# Supplementary material for: Cyanomethylative cyclization of unactivated alkenes with nitriles for the synthesis of cyano-containing ring-fused quinazolin-4(3H)-ones
Source: Royal Society of Chemistry journal article supplement (doi:10.1039/d1nj05001j), 2021-12-06

## Supplementary Information

### Cyanomethylative cyclization of unactivated alkenes with acetonitrile for the synthesis of cyano-containing ring-fused quinazolinones

Han Liu, Zixian Yang, Gao Huang, Jin-Tao Yu\* and Changduo Pan\*

*Email: [yujintao@cczu.edu.cn](mailto:yujintao@cczu.edu.cn); [panchangduo@jsut.edu.cn](mailto:panchangduo@jsut.edu.cn)*

#### Table of Contents

|                                                                          |            |
|--------------------------------------------------------------------------|------------|
| <b>1. General Considerations</b>                                         | <b>S2</b>  |
| <b>2. General Synthetic Procedures</b>                                   | <b>S2</b>  |
| <b>3. Mechanism Studies</b>                                              | <b>S4</b>  |
| <b>4. Characterization Data for the Products</b>                         | <b>S6</b>  |
| <b>5. References</b>                                                     | <b>S19</b> |
| <b>6. Copies of the <sup>1</sup>H NMR and <sup>13</sup>C NMR Spectra</b> | <b>S20</b> |

## 1. General Considerations

**General Information:** Unless otherwise noted, all chemicals were purchased and used without further purification.  $^1\text{H}$  NMR and  $^{13}\text{C}$  NMR spectra were recorded at ambient temperature on a 300 or 400 MHz NMR spectrometer (75 or 100 MHz for  $^{13}\text{C}$ ). NMR experiments are reported in  $\delta$  units, parts per million (ppm), and were referenced to  $\text{CDCl}_3$  ( $d$  7.26 or 77.0) as the internal standard. The coupling constants  $J$  are given in Hz. Column chromatography was performed using EM Silica gel 60 (300-400 mesh).

## 2. General Synthetic Procedures

All quinazolinone derivatives **1** and **4** were prepared according to the previous reports.<sup>1</sup>

**General procedure for the synthesis of ring-fused quinazolinones (3 or 5):**

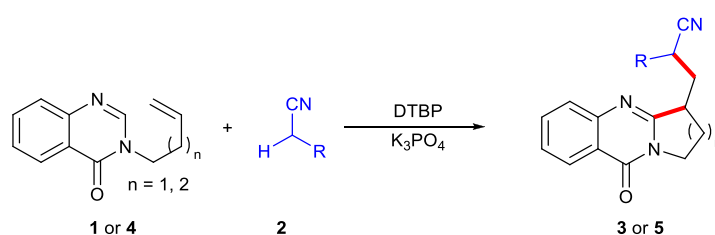

Under air, the mixture of **1** or **4** (0.2 mmol), DTBP (3 equiv.),  $\text{K}_3\text{PO}_4$  (2 equiv.) and alkyl nitrile **2** (2 mL) were added into a Schlenk tube and sealed. The mixture was stirred at  $140\text{ }^\circ\text{C}$  for 16 hours. Then, the solvent was evaporated under reduced pressure, and the residue was purified by silica gel flash column chromatography to obtain product **3** or **5**.

### Derivatization of the cyanomethylated ring-fused quinazolinone products

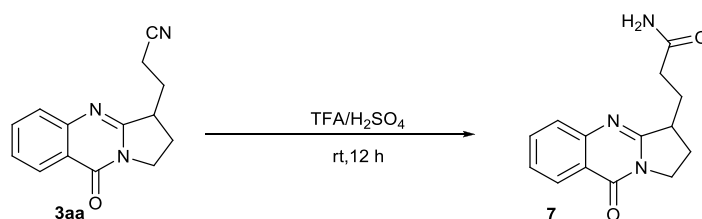

A mixture of **3aa** (48 mg, 0.2 mmol) in 2.0 mL of  $\text{TFA}-\text{H}_2\text{SO}_4$  (4:1, v/v) was stirred overnight at room temperature.<sup>2</sup> After completion of the reaction, the mixture

was poured into ice water and neutralized with 1 M NaOH. The mixture was extracted with EtOAc, dried over anhydrous sodium sulfate, evaporated under vacuum and purified by silica gel flash column chromatography to give **7** (43.6 mg, 85% yield) as a white solid.

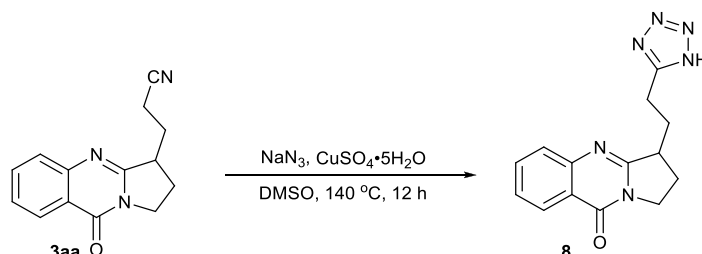

A mixture of **3aa** (48 mg, 0.2 mmol), sodium azide (26 mg, 0.4 mmol), cupric sulfate pentahydrate (2 mol%) in DMSO (2 mL) were stirred at  $140\text{ }^\circ\text{C}$  for 12 h.<sup>3</sup> After completion of the reaction, the mixture was cooled and extracted with EtOAc, dried over anhydrous sodium sulfate, evaporated under vacuum and purified by silica gel flash column chromatography to give compound **8** as colorless oil (28.0 mg 50% yield).

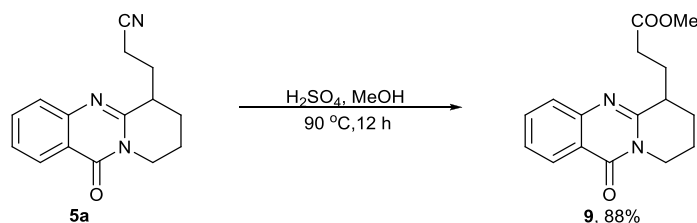

Compound **5a** (51 mg, 0.2 mmol) was treated with 0.4 mL concd  $\text{H}_2\text{SO}_4$  in 4 mL methanol at  $90\text{ }^\circ\text{C}$  for 12 h.<sup>4</sup> After completion, the mixture was neutralized by saturated  $\text{NaHCO}_3$ , extracted with EtOAc, dried over anhydrous sodium sulfate, evaporated under vacuum and purified by silica gel flash column chromatography to give compound **9** (50.4 mg, 88% yield).

## 2. Mechanism Studies

### 2.1 The KIE experiment:

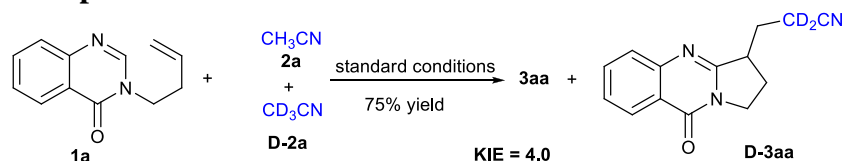

The mixture of **1a** (0.1 mmol), DTBP (3 equiv),  $\text{K}_3\text{PO}_4$  (2 equiv),  $\text{CH}_3\text{CN}$  (0.5 mL) and  $\text{CD}_3\text{CN}$  (0.5 mL) was added to a sealed tube. The mixture was stirred at 140 °C for 16 hours. Then, the solvent was evaporated under reduced pressure, and the residue was purified by silica gel flash column chromatography to obtain product **3aa** and **D-3aa** in 75% yield. A KIE value of 4.0 was observed.

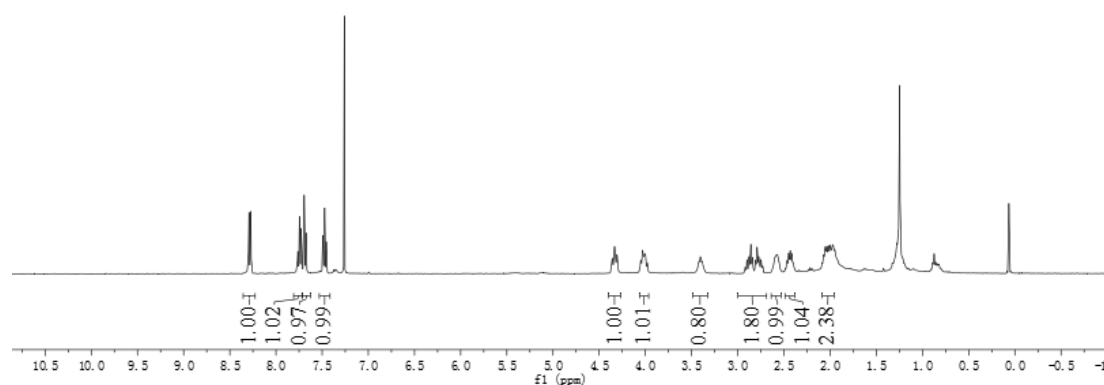

Figure S1  $^1\text{H}$  NMR spectrum of the KIE experiment

### 2.2 Radical inhibiting and trapping experiment

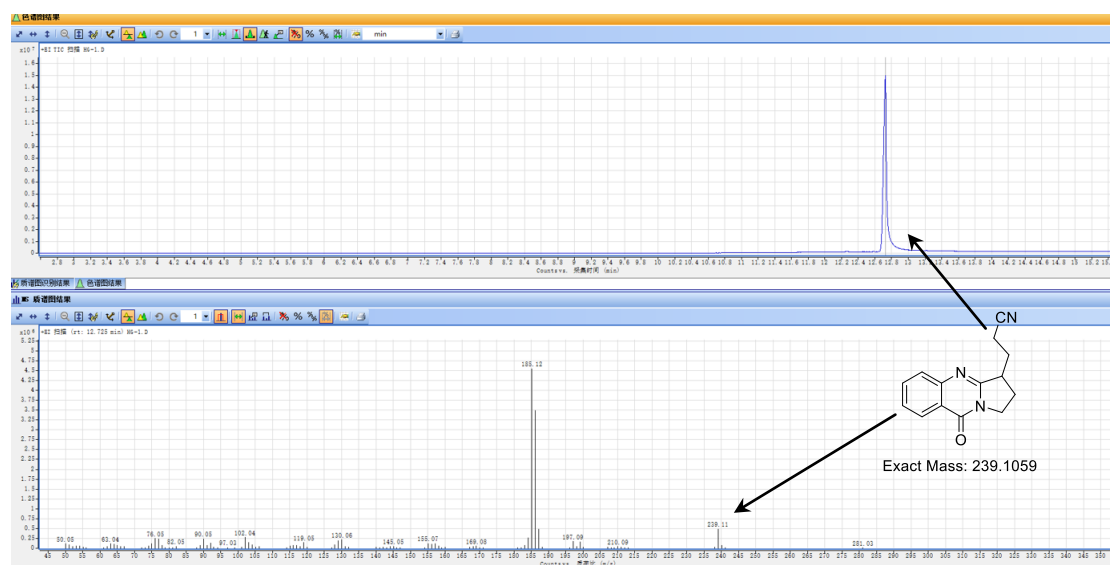

Figure S2 GC-MS spectra of **3aa**.

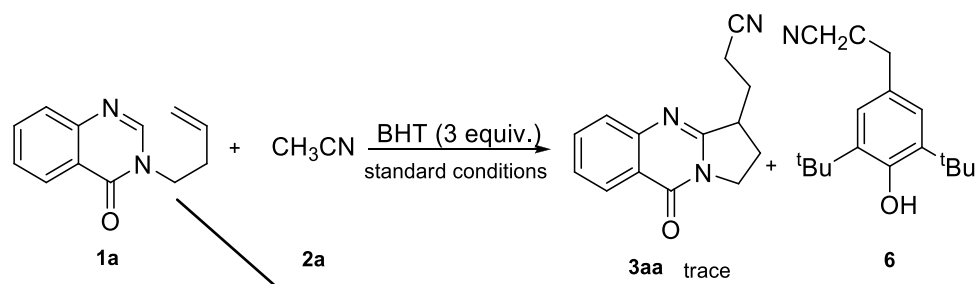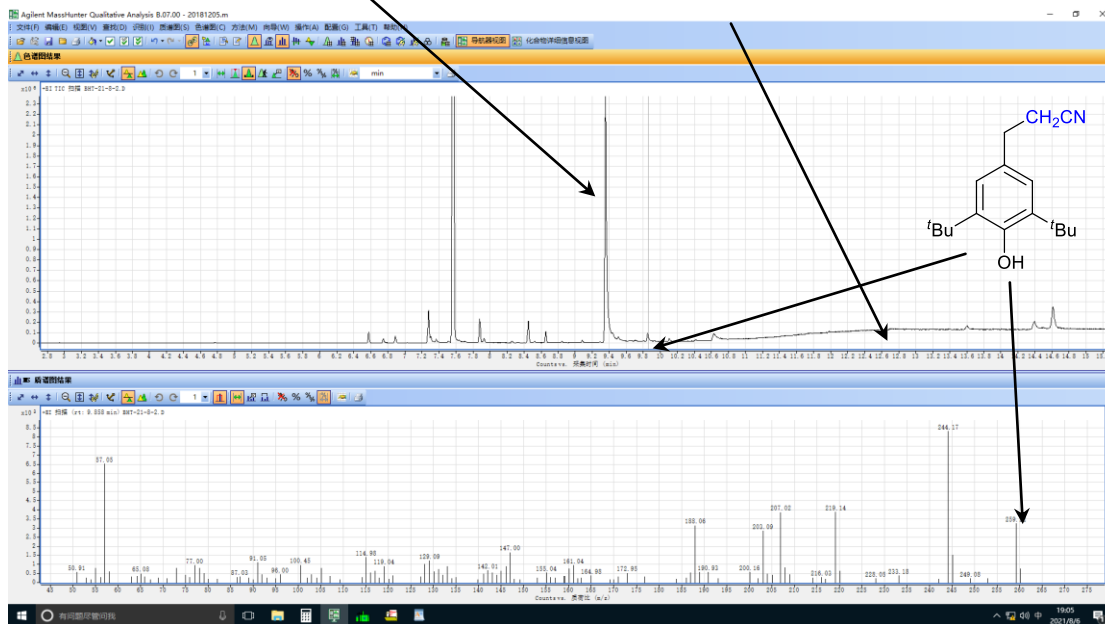

**Figure S3** GC spectrum of the reaction mixture and MS spectrum of adduct 6.

#### 4. Characterization Data for the Products

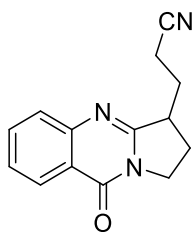

**3-(9-Oxo-1,2,3,9-tetrahydropyrrolo[2,1-*b*]quinazolin-3-yl)propanenitrile (3aa**, 37 mg, 77% yield), yellow oil;  $^1\text{H NMR}$  (400 MHz,  $\text{CDCl}_3$ )  $\delta$  8.20 (dd,  $J = 8.0, 1.6$  Hz, 1H), 7.70-7.66 (m, 1H), 7.59 (dd,  $J = 8.3, 1.2$  Hz, 1H), 7.42-7.38 (m, 1H), 4.29-4.23 (m, 1H), 3.97-3.90 (m, 1H), 3.35-3.27 (m, 1H), 2.86-2.68 (m, 2H), 2.55-2.47 (m, 1H), 2.40-2.31 (m, 1H), 2.02-1.84 (m, 2H);  $^{13}\text{C NMR}$  (101 MHz,  $\text{CDCl}_3$ )  $\delta$  160.5, 160.0, 148.8, 134.0, 127.0, 126.3, 126.1, 120.6, 119.4, 44.5, 42.1, 27.8, 26.4, 15.2; HRMS (ESI-TOF)  $m/z$  calcd for  $\text{C}_{14}\text{H}_{13}\text{N}_3\text{ONa}$   $[\text{M}+\text{Na}]^+$  262.0951, found 262.0948.

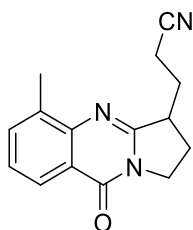

**3-(5-Methyl-9-oxo-1,2,3,9-tetrahydropyrrolo[2,1-*b*]quinazolin-3-yl)propanenitrile (3ba**, 33.2 mg, 65% yield), yellow solid, mp: 149-151  $^\circ\text{C}$ ;  $^1\text{H NMR}$  (300 MHz,  $\text{CDCl}_3$ )  $\delta$  8.08 (dd,  $J = 8.0, 1.5$  Hz, 1H), 7.55 (d,  $J = 7.2$  Hz, 1H), 7.31 (t,  $J = 7.6$  Hz, 1H), 4.32-4.24 (m, 1H), 4.00-3.90 (m, 1H), 3.40-3.29 (m, 1H), 3.02-2.78 (m, 2H), 2.55 (m, 4H), 2.38-2.26 (m, 1H), 2.09-1.83 (m, 2H);  $^{13}\text{C NMR}$  (101 MHz,  $\text{CDCl}_3$ )  $\delta$  161.1, 158.7, 147.3, 135.5, 134.9, 126.1, 124.0, 120.6, 119.5, 44.5, 42.0, 28.3, 26.8, 17.6, 15.3; HRMS (ESI-TOF)  $m/z$  calcd for  $\text{C}_{15}\text{H}_{15}\text{N}_3\text{ONa}$   $[\text{M}+\text{Na}]^+$  276.1107, found 276.1105.

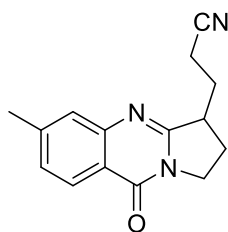

**3-(6-Methyl-9-oxo-1,2,3,9-tetrahydropyrrolo[2,1-*b*]quinazolin-3-yl)propanenitrile (3ca**, 35.6 mg, 70% yield), yellow oil;  $^1\text{H NMR}$  (400 MHz,  $\text{CDCl}_3$ )  $\delta$  8.13 (d,  $J = 8.1$  Hz, 1H), 7.43 (s, 1H), 7.26 (dd,  $J = 8.2, 1.5$  Hz, 1H), 4.31-4.26 (m, 1H), 4.00-3.92 (m, 1H), 3.37-3.29 (m, 1H), 2.89-2.71 (m, 2H), 2.58-2.50 (m, 1H), 2.47 (s, 3H), 2.47-2.33 (m, 1H), 2.05-1.89 (m, 2H);  $^{13}\text{C NMR}$  (101 MHz,  $\text{CDCl}_3$ )  $\delta$  160.7, 159.9, 148.8, 145.3, 128.2, 126.8, 126.2, 119.3, 118.3, 44.6, 42.3, 28.0, 26.6, 21.9, 15.3; HRMS (ESI-TOF)  $m/z$  calcd for  $\text{C}_{15}\text{H}_{15}\text{N}_3\text{ONa}$   $[\text{M}+\text{Na}]^+$  276.1107, found 276.1108.

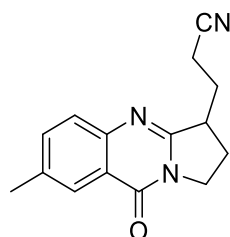

**3-(7-Methyl-9-oxo-1,2,3,9-tetrahydropyrrolo[2,1-*b*]quinazolin-3-yl)propanenitrile (3da)**, 29.5 mg, 58% yield), yellow solid, mp: 158-160 °C;  $^1\text{H}$  NMR (400 MHz,  $\text{CDCl}_3$ )  $\delta$  8.05 (s, 1H), 7.56 (t,  $J = 2.7$  Hz, 2H), 4.34-4.28 (m, 1H), 4.03-3.96 (m, 1H), 3.39-3.33 (m, 1H), 2.90-2.73 (m, 2H), 2.60-2.55 (m, 1H), 2.48 (s, 3H), 2.44-2.38 (m, 1H), 2.05-1.92 (m, 2H);  $^{13}\text{C}$  NMR (101 MHz,  $\text{CDCl}_3$ )  $\delta$  160.8, 159.0, 146.7, 136.8, 135.7, 126.8, 125.8, 120.5, 119.3, 44.6, 42.2, 28.0, 26.7, 21.3, 15.3; HRMS (ESI-TOF)  $m/z$  calcd for  $\text{C}_{15}\text{H}_{15}\text{N}_3\text{ONa}$   $[\text{M}+\text{Na}]^+$  276.1107, found 276.1104.

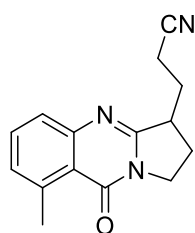

**3-(8-Methyl-9-oxo-1,2,3,9-tetrahydropyrrolo[2,1-*b*]quinazolin-3-yl)propanenitrile (3ea)**, 32.9 mg, 65% yield), yellow oil;  $^1\text{H}$  NMR (300 MHz,  $\text{CDCl}_3$ )  $\delta$  7.53 (t,  $J = 7.7$  Hz, 1H), 7.46 (d,  $J = 8.1$  Hz, 1H), 7.17 (d,  $J = 7.2$  Hz, 1H), 4.26-4.21 (m, 1H), 3.96-3.89 (m, 1H), 3.34-3.30 (m, 1H), 2.84-2.71 (m, 5H), 2.55-2.48 (m, 1H), 2.41-2.32 (m, 1H), 2.03-1.87 (m, 2H);  $^{13}\text{C}$  NMR (101 MHz,  $\text{CDCl}_3$ )  $\delta$  161.5, 159.4, 150.5, 141.0, 133.3, 129.2, 125.3, 119.3, 119.2, 44.6, 42.2, 28.0, 26.5, 23.0, 15.3; HRMS (ESI-TOF)  $m/z$  calcd for  $\text{C}_{15}\text{H}_{15}\text{N}_3\text{ONa}$   $[\text{M}+\text{Na}]^+$  276.1107, found 276.1110.

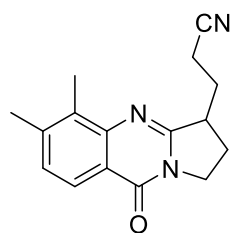

**3-(5,6-Dimethyl-9-oxo-1,2,3,9-tetrahydropyrrolo[2,1-*b*]quinazolin-3-yl)propanenitrile (3fa)**, 35.2 mg, 66% yield), yellow solid, mp: 175-176 °C;  $^1\text{H}$  NMR (400 MHz,  $\text{CDCl}_3$ )  $\delta$  7.98 (d,  $J = 8.1$  Hz, 1H), 7.22 (d,  $J = 8.1$  Hz, 1H), 4.30-4.24 (m, 1H), 3.97-3.90 (m, 1H), 3.37-3.29 (m, 1H), 2.99-2.79 (m, 2H), 2.56-2.50 (m, 1H), 2.48 (s, 3H), 2.40 (s, 3H), 2.36-2.29 (m, 1H), 2.07-1.98 (m, 1H), 1.94-1.84 (m, 1H);  $^{13}\text{C}$  NMR (101 MHz,  $\text{CDCl}_3$ )  $\delta$  161.2, 158.4, 147.2, 143.2, 133.4, 128.4, 123.1, 119.5, 118.6, 44.4, 42.1, 28.3, 26.8, 21.0, 15.3, 13.3; HRMS (ESI-TOF)  $m/z$  calcd for  $\text{C}_{16}\text{H}_{17}\text{N}_3\text{ONa}$   $[\text{M}+\text{Na}]^+$  290.1264, found 290.1268.

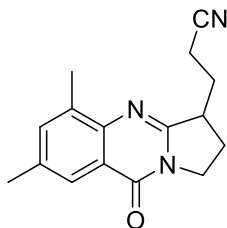

**3-(5,7-Dimethyl-9-oxo-1,2,3,9-tetrahydropyrrolo[2,1-*b*]quinazolin-3-yl)propanenitrile (3ga)**, 33.8 mg, 63% yield), yellow solid, mp: 180-182 °C;  $^1\text{H}$  NMR (400 MHz,  $\text{CDCl}_3$ )  $\delta$  7.88-7.87 (m, 1H), 7.38-7.37 (m, 1H), 4.31-4.25 (m, 1H), 3.98-3.91 (m, 1H), 3.37-3.29 (m, 1H), 3.00-2.80 (m, 2H), 2.56-2.49 (m, 4H), 2.41 (s, 3H), 2.36-2.27 (m, 1H), 2.07-1.98 (m, 1H), 1.95-1.85 (m, 1H);  $^{13}\text{C}$  NMR (101 MHz,  $\text{CDCl}_3$ )  $\delta$  161.1, 157.8, 145.5, 136.4, 136.1, 135.2, 123.4, 120.4, 119.5, 44.4, 41.9, 28.3, 26.9, 21.2, 17.4, 15.3; HRMS (ESI-TOF)  $m/z$  calcd for  $\text{C}_{16}\text{H}_{17}\text{N}_3\text{ONa}$   $[\text{M}+\text{Na}]^+$  290.1264, found 290.1265.

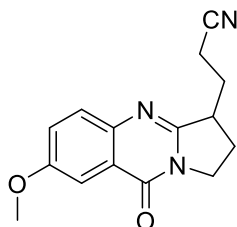

**3-(7-Methoxy-9-oxo-1,2,3,9-tetrahydropyrrolo[2,1-*b*]quinazolin-3-yl)propanenitrile (3ha)**, 33.1 mg, 62% yield), yellow oil;  $^1\text{H}$  NMR (400 MHz,  $\text{CDCl}_3$ )  $\delta$  7.57 (d,  $J = 3.0$  Hz, 1H), 7.53 (d,  $J = 8.9$  Hz, 1H), 7.29-7.26 (m, 1H), 4.30-4.24 (m, 1H), 3.99-3.92 (m, 1H), 3.87 (s, 3H), 3.35-3.27 (m, 1H), 2.86-2.68 (m, 2H), 2.56-2.48 (m, 1H), 2.40-2.30 (m, 1H), 2.02-1.85 (m, 2H);  $^{13}\text{C}$  NMR (101 MHz,  $\text{CDCl}_3$ )  $\delta$  160.5, 158.2, 157.7, 143.2, 128.4, 124.4, 121.5, 119.3, 105.9, 55.8, 44.7, 42.0, 28.0, 26.7, 15.3; HRMS (ESI-TOF)  $m/z$  calcd for  $\text{C}_{15}\text{H}_{15}\text{N}_3\text{O}_2\text{Na}$   $[\text{M}+\text{Na}]^+$  292.1056, found 292.1061.

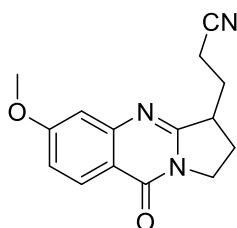

**3-(6-Methoxy-9-oxo-1,2,3,9-tetrahydropyrrolo[2,1-*b*]quinazolin-3-yl)propanenitrile (3ia)**, 34.8 mg, 65% yield), yellow oil;  $^1\text{H}$  NMR (400 MHz,  $\text{CDCl}_3$ )  $\delta$  8.15-8.13 (m, 1H), 7.02-6.99 (m, 2H), 4.31-4.25 (m, 1H), 4.00-3.92 (m, 1H), 3.90 (s, 3H), 3.38-3.30 (m, 1H), 2.88-2.70 (m, 2H), 2.58-2.50 (m, 1H), 2.43-2.35 (m, 1H), 2.05-1.87 (m, 2H);  $^{13}\text{C}$  NMR (101 MHz,  $\text{CDCl}_3$ )  $\delta$  164.5, 160.6, 160.3, 151.1, 127.8, 119.2, 116.6, 114.2, 107.9, 55.7, 44.6, 42.4, 28.0, 26.6, 15.4; HRMS (ESI-TOF)  $m/z$  calcd for  $\text{C}_{15}\text{H}_{15}\text{N}_3\text{O}_2\text{Na}$   $[\text{M}+\text{Na}]^+$  292.1056, found 292.1060.



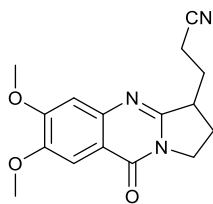

**3-(6,7-Dimethoxy-9-oxo-1,2,3,9-tetrahydropyrrolo[2,1-*b*]quinazolin-3-yl)propane nitrile (3ja)**, 33.5 mg, 56% yield), yellow oil;  $^1\text{H}$  NMR (400 MHz,  $\text{CDCl}_3$ )  $\delta$  7.56 (s, 1H), 7.04 (s, 1H), 4.33-4.27 (m, 1H), 4.01-3.94 (m, 7H), 3.38-3.30 (m, 1H), 2.87-2.70 (m, 2H), 2.58-2.51 (m, 1H), 2.42-2.34 (m, 1H), 2.05-1.88 (m, 2H);  $^{13}\text{C}$  NMR (101 MHz,  $\text{CDCl}_3$ )  $\delta$  160.1, 158.6, 154.7, 148.8, 145.1, 119.2, 114.0, 107.5, 105.3, 56.3, 56.3, 44.7, 42.2, 28.1, 26.7, 15.3; HRMS (ESI-TOF)  $m/z$  calcd for  $\text{C}_{16}\text{H}_{17}\text{N}_3\text{O}_3\text{Na}$   $[\text{M}+\text{Na}]^+$  322.1162, found 322.1159.

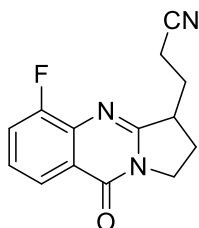

**3-(5-Fluoro-9-oxo-1,2,3,9-tetrahydropyrrolo[2,1-*b*]quinazolin-3-yl)propanenitrile (3ka)**, 37.5 mg, 73% yield), yellow oil;  $^1\text{H}$  NMR (400 MHz,  $\text{CDCl}_3$ )  $\delta$  7.97 (d,  $J = 7.8$  Hz, 1H), 7.43-7.32 (m, 2H), 4.32-4.26 (m, 1H), 4.01-3.94 (m, 1H), 3.42-3.34 (m, 1H), 2.89-2.70 (m, 2H), 2.61-2.53 (m, 1H), 2.46-2.38 (m, 1H), 2.04-1.90 (m, 2H);  $^{13}\text{C}$  NMR (101 MHz,  $\text{CDCl}_3$ )  $\delta$  160.6, 159.8, 156.8 (d,  $J_{\text{C-F}} = 256.0$  Hz), 138.3 (d,  $J_{\text{C-F}} = 11.8$  Hz), 126.6 (d,  $J_{\text{C-F}} = 8.0$  Hz), 122.7, 121.8 (d,  $J_{\text{C-F}} = 4.2$  Hz), 119.7 (d,  $J_{\text{C-F}} = 19.8$  Hz), 119.2, 44.8, 42.5, 28.0, 26.6, 15.3; HRMS (ESI-TOF)  $m/z$  calcd for  $\text{C}_{14}\text{H}_{12}\text{FN}_3\text{ONa}$   $[\text{M}+\text{Na}]^+$  280.0857, found 280.0855.

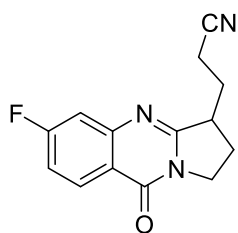

**3-(6-Fluoro-9-oxo-1,2,3,9-tetrahydropyrrolo[2,1-*b*]quinazolin-3-yl)propanenitrile (3la)**, 37.6 mg, 73% yield), yellow oil;  $^1\text{H}$  NMR (400 MHz,  $\text{CDCl}_3$ )  $\delta$  8.23 (dd,  $J = 8.8, 6.1$  Hz, 1H), 7.26 (dd,  $J = 9.8, 2.5$  Hz, 1H), 7.16-7.11 (m, 1H), 4.31-4.25 (m, 1H), 3.99-3.92 (m, 1H), 3.39-3.31 (m, 1H), 2.89-2.69 (m, 2H), 2.59-2.52 (m, 1H), 2.42-2.33 (m, 1H), 2.04-1.88 (m, 2H);  $^{13}\text{C}$  NMR (75 MHz,  $\text{CDCl}_3$ )  $\delta$  166.4 (d,  $J_{\text{C-F}} = 252.4$  Hz), 161.3, 160.00, 151.0 (d,  $J_{\text{C-F}} = 13.0$  Hz), 129.0 (d,  $J_{\text{C-F}} = 10.6$  Hz), 119.2, 117.5 (d,  $J_{\text{C-F}} = 2.0$  Hz), 115.3 (d,  $J_{\text{C-F}} = 23.4$  Hz), 112.5 (d,  $J_{\text{C-F}} = 21.9$  Hz), 44.6, 42.3, 27.9, 26.6, 15.3; HRMS (ESI-TOF)  $m/z$  calcd for  $\text{C}_{14}\text{H}_{12}\text{FN}_3\text{ONa}$   $[\text{M}+\text{Na}]^+$  280.0857, found 280.0854.

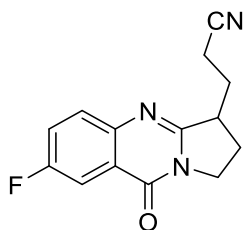

**3-(7-Fluoro-9-oxo-1,2,3,9-tetrahydropyrrolo[2,1-*b*]quinazolin-3-yl)propanenitrile (3ma)**, 35.4 mg, 69% yield), yellow oil;  $^1\text{H}$  NMR (400 MHz,  $\text{CDCl}_3$ )  $\delta$  7.87 (dd,  $J = 8.5, 3.0$  Hz, 1H), 7.64 (dd,  $J = 8.9, 4.8$  Hz, 1H), 7.46-7.41 (m, 1H), 4.33-3.27 (m, 1H), 4.01-3.94 (m, 1H), 3.39-3.31 (m, 1H), 2.90-2.71 (m, 2H), 2.61-2.53 (m, 1H), 2.43-2.30 (m, 1H), 2.06-1.89 (m, 2H);  $^{13}\text{C}$  NMR (101 MHz,  $\text{CDCl}_3$ )  $\delta$  160.7 (d,  $J_{\text{C-F}} = 248.9$  Hz), 160.0 (d,  $J_{\text{C-F}} = 3.5$  Hz), 159.3 (d,  $J_{\text{C-F}} = 2.2$  Hz), 145.4 (d,  $J_{\text{C-F}} = 2.0$  Hz), 129.4 (d,  $J_{\text{C-F}} = 8.3$  Hz), 122.7 (d,  $J_{\text{C-F}} = 24.2$  Hz), 122.0 (d,  $J_{\text{C-F}} = 8.6$  Hz), 119.2, 111.3 (d,  $J_{\text{C-F}} = 23.6$  Hz), 44.7, 42.1, 27.9, 26.7, 15.3; HRMS (ESI-TOF)  $m/z$  calcd for  $\text{C}_{14}\text{H}_{12}\text{FN}_3\text{ONa}$   $[\text{M}+\text{Na}]^+$  280.0857, found 280.0856.

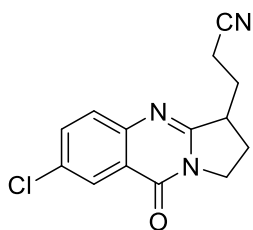

**3-(7-Chloro-9-oxo-1,2,3,9-tetrahydropyrrolo[2,1-*b*]quinazolin-3-yl)propanenitrile (3na)**, 16.9 mg, 31% yield), yellow oil;  $^1\text{H}$  NMR (400 MHz,  $\text{CDCl}_3$ )  $\delta$  8.22, (d,  $J = 2.2$  Hz, 1H), 7.68-7.62 (m, 2H), 4.36-4.30 (m, 1H), 4.05-3.98 (m, 1H), 3.46-3.38 (m, 1H), 2.91-2.72 (m, 2H), 2.63-2.56 (m, 1H), 2.50-2.39 (m, 1H), 2.08-1.93 (m, 2H);  $^{13}\text{C}$  NMR (101 MHz,  $\text{CDCl}_3$ )  $\delta$  160.2, 159.7, 147.4, 134.6, 132.4, 128.7, 125.7, 121.9, 119.2, 44.8, 42.2, 27.9, 26.7, 15.4; HRMS (ESI-TOF)  $m/z$  calcd for  $\text{C}_{14}\text{H}_{12}\text{ClN}_3\text{ONa}$   $[\text{M}+\text{Na}]^+$  296.0561, found 296.0559.

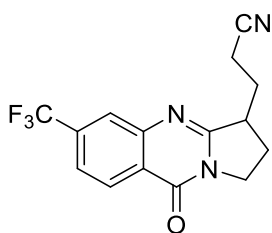

**3-(9-Oxo-6-(trifluoromethyl)-1,2,3,9-tetrahydropyrrolo[2,1-*b*]quinazolin-3-yl)propanenitrile (3oa)**, 38.4 mg, 62% yield), yellow solid, mp: 158-159  $^{\circ}\text{C}$ ;  $^1\text{H}$  NMR (300 MHz,  $\text{CDCl}_3$ )  $\delta$  8.33 (d,  $J = 8.3$  Hz, 1H), 7.90 (d,  $J = 1.6$  Hz, 1H), 7.62 (dd,  $J = 8.4, 1.7$  Hz, 1H), 4.36-4.27 (m, 1H), 4.04-3.94 (m, 1H), 3.44-3.33 (m, 1H), 2.94-2.68 (m, 2H), 2.64-2.53 (m, 1H), 2.44-2.32 (m, 1H), 2.08-1.89 (m, 2H);  $^{13}\text{C}$  NMR (75 MHz,  $\text{CDCl}_3$ )  $\delta$  161.4, 159.9, 148.9, 135.7 (q,  $J_{\text{C-F}} = 32.6$  Hz), 127.5, 124.7 (q,  $J_{\text{C-F}} = 4.0$  Hz), 123.4 (q,  $J_{\text{C-F}} = 271.4$  Hz), 123.1, 122.5 (q,  $J_{\text{C-F}} = 3.4$  Hz), 119.1, 44.8, 42.3, 27.8, 26.6, 15.3; HRMS (ESI-TOF)  $m/z$  calcd for  $\text{C}_{15}\text{H}_{12}\text{F}_3\text{N}_3\text{ONa}$   $[\text{M}+\text{Na}]^+$  330.0825, found 330.0823.

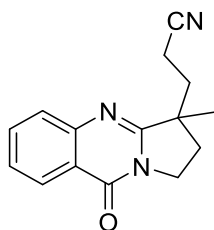

**3-(3-Methyl-9-oxo-1,2,3,9-tetrahydropyrrolo[2,1-*b*]quinazolin-3-yl)propanenitrile (3pa)**, 39.1 mg, 77% yield), colorless oil;  $^1\text{H}$  NMR (400 MHz,  $\text{CDCl}_3$ )  $\delta$  8.25 (dt,  $J = 8.0, 1.8$  Hz, 1H), 7.73-7.64 (m, 2H), 7.45-7.41 (m, 1H), 4.21-4.15 (m, 1H), 4.10-4.03 (m, 1H), 2.70-2.62 (m, 1H), 2.57-2.49 (m, 1H), 2.24-2.08 (m, 4H), 1.42 (s, 3H);  $^{13}\text{C}$  NMR (101 MHz,  $\text{CDCl}_3$ )  $\delta$  162.3, 160.9, 149.0, 134.2, 127.2, 126.6, 126.4, 120.8, 119.6, 45.8, 43.1, 33.9, 33.2, 23.6, 12.7; HRMS (ESI-TOF)  $m/z$  calcd for  $\text{C}_{15}\text{H}_{15}\text{N}_3\text{ONa}$   $[\text{M}+\text{Na}]^+$  276.1107, found 276.1104.

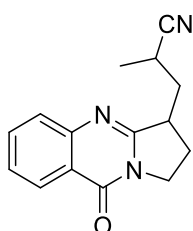

**2-Methyl-3-(9-oxo-1,2,3,9-tetrahydropyrrolo[2,1-*b*]quinazolin-3-yl)propanenitrile (3ab)**, 41.6 mg, 82% yield), yellow oil;  $^1\text{H}$  NMR (300 MHz,  $\text{CDCl}_3$ )  $\delta$  8.19-8.15 (m, 1H), 7.65-7.54 (m, 2H), 7.39-7.34 (m, 1H), 4.30-4.18 (m, 1H), 3.94-3.84 (m, 1H), 3.45-3.28 (m, 1.45H), 2.97-2.89 (m, 0.45H), 2.59-2.44 (m, 1.55H), 2.20-2.12 (m, 0.55H), 1.96-1.66 (m, 2H), 1.37 (dd,  $J = 10.8, 6.9$  Hz, 3H);  $^{13}\text{C}$  NMR (75 MHz,  $\text{CDCl}_3$ )  $\delta$  160.8, 160.2, 159.9, 149.0, 148.9, 134.2, 134.1, 127.1, 127.0, 126.5, 126.5, 126.3, 126.3, 122.9, 122.1, 120.8, 44.6, 41.8, 41.3, 37.0, 36.0, 27.4, 26.6, 24.2, 23.3, 18.6, 18.1; HRMS (ESI-TOF)  $m/z$  calcd for  $\text{C}_{15}\text{H}_{15}\text{N}_3\text{ONa}$   $[\text{M}+\text{Na}]^+$  276.1107, found 276.1109.

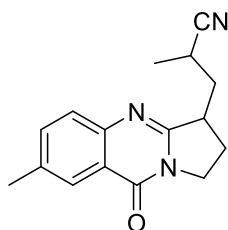

**2-Methyl-3-(7-methyl-9-oxo-1,2,3,9-tetrahydropyrrolo[2,1-*b*]quinazolin-3-yl)propanenitrile (3db)**, 39.1 mg, 73% yield), yellow oil;  $^1\text{H}$  NMR (400 MHz,  $\text{CDCl}_3$ )  $\delta$  8.02 (s, 1H), 7.52 (t,  $J = 2.7$  Hz, 2H), 4.34-4.25 (m, 1H), 3.99-3.90 (m, 1H), 3.50-3.34 (m, 1.50H), 3.03-2.94 (m, 0.50H), 2.64-2.50 (m, 1.52H), 2.45 (s, 3H), 2.25-2.18 (m, 0.48H), 2.00-1.84 (m, 1.48H), 1.80-1.73 (m, 0.52H), 1.46-1.40 (m, 3H);  $^{13}\text{C}$  NMR (75 MHz,  $\text{CDCl}_3$ )  $\delta$  160.7, 160.7, 159.4, 159.1, 146.8, 146.7, 136.7, 135.7, 135.6, 126.8, 126.7, 125.8, 125.8, 122.9, 122.1, 120.4, 44.7, 44.6, 41.7, 41.2, 37.1, 36.0, 27.4, 26.6, 24.2, 23.3, 21.2, 18.6, 18.1; HRMS (ESI-TOF)  $m/z$  calcd for  $\text{C}_{16}\text{H}_{17}\text{N}_3\text{ONa}$   $[\text{M}+\text{Na}]^+$  290.1264, found 290.1261.

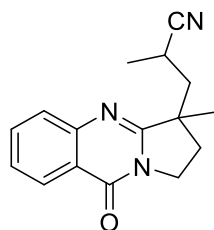

**2-Methyl-3-(3-methyl-9-oxo-1,2,3,9-tetrahydropyrrolo[2,1-*b*]quinazolin-3-yl)propanenitrile (3pb)**, 50.2 mg, 94% yield), yellow oil;  $^1\text{H NMR}$  (400 MHz,  $\text{CDCl}_3$ )  $\delta$  8.27 (d,  $J = 8.0$  Hz, 1H), 7.73-7.65 (m, 2H), 7.46-7.42 (m, 1H), 4.29-4.19 (m, 1H), 4.10-4.01 (m, 1H), 3.11-3.02 (m, 0.59H), 2.75-2.66 (m, 0.41H), 2.49-2.23 (m, 2H), 2.18-2.01 (m, 2H), 1.47 (d,  $J = 7.1$  Hz, 3H), 1.39 (dd,  $J = 7.1, 3.7$  Hz, 3H);  $^{13}\text{C NMR}$  (75 MHz,  $\text{CDCl}_3$ )  $\delta$  163.3, 162.6, 160.9, 160.9, 149.2, 149.1, 134.2, 134.2, 127.2, 126.5, 126.5, 126.4, 126.4, 123.3, 123.1, 120.9, 120.8, 77.5, 77.1, 76.7, 46.6, 46.0, 43.4, 43.2, 42.6, 42.1, 33.8, 32.0, 25.5, 23.1, 21.5, 21.0, 20.1, 19.8; HRMS (ESI-TOF)  $m/z$  calcd for  $\text{C}_{16}\text{H}_{17}\text{N}_3\text{ONa}$   $[\text{M}+\text{Na}]^+$  290.1264, found 290.1267.

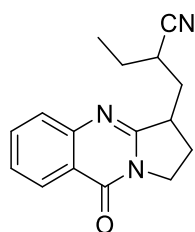

**2-((9-Oxo-1,2,3,9-tetrahydropyrrolo[2,1-*b*]quinazolin-3-yl)methyl)butanenitrile (3ac)**, 34.5 mg, 65% yield), yellow oil;  $^1\text{H NMR}$  (400 MHz,  $\text{CDCl}_3$ )  $\delta$  8.26-8.22 (m, 1H), 7.70-7.62 (m, 2H), 7.44-7.41 (m, 1H), 4.35-4.25 (m, 1H), 4.00-3.91 (m, 1H), 3.50-3.29 (m, 1.47H), 2.80-2.74 (m, 0.50H), 2.64-2.52 (m, 1.53H), 2.27-2.20 (m, 0.58H), 2.01-1.83 (m, 1.60H), 1.80-1.67 (m, 2.41H), 1.16-1.12 (m, 3H);  $^{13}\text{C NMR}$  (75 MHz,  $\text{CDCl}_3$ )  $\delta$  160.8, 160.3, 159.9, 148.9, 148.8, 134.2, 134.1, 127.1, 127.0, 126.5, 126.4, 126.3, 122.1, 121.2, 120.8, 44.7, 41.9, 41.5, 35.0, 34.0, 31.8, 31.0, 27.5, 26.6, 26.1, 25.7, 11.6, 11.5; HRMS (ESI-TOF)  $m/z$  calcd for  $\text{C}_{16}\text{H}_{17}\text{N}_3\text{ONa}$   $[\text{M}+\text{Na}]^+$  290.1264, found 290.1265.

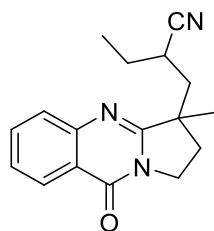

**2-((3-Methyl-9-oxo-1,2,3,9-tetrahydropyrrolo[2,1-*b*]quinazolin-3-yl)methyl)butanenitrile (3pc)**, 45.0 mg, 80% yield), yellow oil;  $^1\text{H NMR}$  (400 MHz,  $\text{CDCl}_3$ )  $\delta$  8.27 (d,  $J = 8.0$  Hz, 1H), 7.74-7.65 (m, 2H), 7.46-7.42 (m, 1H), 4.29-4.19 (m, 1H), 4.10-4.02 (m, 1H), 2.97-2.90 (m, 0.61H), 2.56-2.01 (m, 4.39H), 1.72-1.64 (m, 2H), 1.47 (d,  $J = 5.0$  Hz, 3H), 1.12-1.06 (m, 3H);  $^{13}\text{C NMR}$  (75 MHz,  $\text{CDCl}_3$ )  $\delta$  163.4, 162.6, 160.9, 149.1, 149.0, 134.2, 127.1, 127.1, 126.5, 126.4, 122.5, 122.3, 120.9, 120.8, 46.6, 45.9, 43.4, 43.2, 40.6, 40.1, 33.8, 32.0, 28.9, 28.4, 27.3, 27.2, 25.6, 23.0, 11.4, 11.3; HRMS (ESI-TOF)  $m/z$  calcd for  $\text{C}_{17}\text{H}_{19}\text{N}_3\text{ONa}$   $[\text{M}+\text{Na}]^+$  304.1420, found 304.1423.

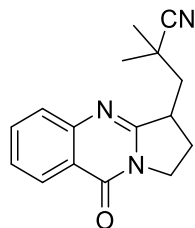

**2,2-Dimethyl-3-(9-oxo-1,2,3,9-tetrahydropyrrolo[2,1-*b*]quinazolin-3-yl)propanenitrile (3ad)**, 17.6 mg, 33% yield), colourless oil;  $^1\text{H}$  NMR (400 MHz,  $\text{CDCl}_3$ )  $\delta$  8.31 (d,  $J = 7.8$  Hz, 1H), 7.78-7.72 (m, 2H), 7.51-7.47 (m, 1H), 4.44-4.38 (m, 1H), 4.03-3.95 (m, 1H), 3.51-3.43 (m, 1H), 2.88-2.80 (m, 1H), 2.67 (dd,  $J = 14.2, 2.6$  Hz, 1H), 2.20-2.10 (m, 1H), 1.95-1.82 (m, 1H), 1.55 (d,  $J = 5.4$  Hz, 6H);  $^{13}\text{C}$  NMR (75 MHz,  $\text{CDCl}_3$ )  $\delta$  160.8, 160.4, 148.8, 134.2, 126.9, 126.6, 126.5, 124.9, 120.8, 44.9, 42.9, 41.1, 31.2, 28.5, 28.2, 26.0; HRMS (ESI-TOF)  $m/z$  calcd for  $\text{C}_{16}\text{H}_{17}\text{N}_3\text{ONa}$   $[\text{M}+\text{Na}]^+$  290.1264, found 290.1267.

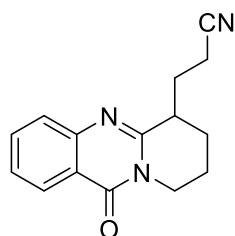

**3-(11-Oxo-6,8,9,11-tetrahydro-7H-pyrido[2,1-*b*]quinazolin-6-yl)propanenitrile (5a)**, 31.7 mg, 63% yield), yellow oil;  $^1\text{H}$  NMR (400 MHz,  $\text{CDCl}_3$ )  $\delta$  8.23 (dd,  $J = 8.1, 1.5$  Hz, 1H), 7.72-7.68 (m, 1H), 7.59 (dd,  $J = 8.4, 1.2$  Hz, 1H), 7.44-7.40 (m, 1H), 4.41-4.35 (m, 1H), 3.87-3.80 (m, 1H), 2.99-2.92 (m, 1H), 2.86-2.67 (m, 2H), 2.52-2.43 (m, 1H), 2.20-2.12 (m, 1H), 2.06-1.93 (m, 3H), 1.66-1.56 (m, 1H);  $^{13}\text{C}$  NMR (101 MHz,  $\text{CDCl}_3$ )  $\delta$  161.8, 155.9, 146.9, 134.2, 126.9, 126.7, 126.5, 120.3, 119.8, 41.0, 38.7, 28.6, 25.4, 20.5, 15.7; HRMS (ESI-TOF)  $m/z$  calcd for  $\text{C}_{15}\text{H}_{15}\text{N}_3\text{ONa}$   $[\text{M}+\text{Na}]^+$  276.1107, found 276.1105.

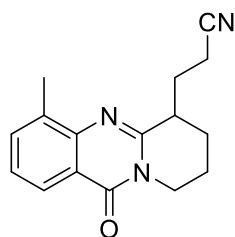

**3-(4-Methyl-11-oxo-6,8,9,11-tetrahydro-7H-pyrido[2,1-*b*]quinazolin-6-yl)propane nitrile (5b)**, 30.7 mg, 57% yield), colorless oil;  $^1\text{H}$  NMR (400 MHz,  $\text{CDCl}_3$ )  $\delta$  8.08 (dd,  $J = 8.0, 1.5$  Hz, 1H), 7.56-7.54 (m, 1H), 7.31 (t,  $J = 7.6$  Hz, 1H), 4.42-4.35 (m, 1H), 3.87-3.80 (m, 1H), 3.01-2.87 (m, 2H), 2.81-2.73 (m, 1H), 2.56 (s, 3H), 2.52-2.43 (m, 1H), 2.22-2.13 (m, 1H), 2.07-1.95 (m, 3H), 1.65-1.56 (m, 1H);  $^{13}\text{C}$  NMR (101 MHz,  $\text{CDCl}_3$ )  $\delta$  162.2, 154.7, 145.4, 135.3, 134.7, 126.1, 124.3, 120.2, 119.9, 40.9, 38.8, 28.8, 25.8, 20.7, 17.4, 15.8; HRMS (ESI-TOF)  $m/z$  calcd for  $\text{C}_{16}\text{H}_{17}\text{N}_3\text{ONa}$   $[\text{M}+\text{Na}]^+$  290.1264, found 290.1267.

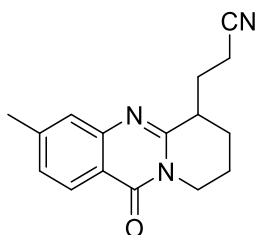

**3-(3-Methyl-11-oxo-6,8,9,11-tetrahydro-7H-pyrido[2,1-*b*]quinazolin-6-yl)propane nitrile (5c)**, 30.7 mg, 57% yield), colorless oil;  $^1\text{H}$  NMR (400 MHz,  $\text{CDCl}_3$ )  $\delta$  8.10 (d,  $J = 8.1$  Hz, 1H), 7.39 (s, 1H), 7.24 (d,  $J = 8.1$  Hz, 1H), 4.40-4.33 (m, 1H), 3.85-3.78 (m, 1H), 2.97-2.90 (m, 1H), 2.86-2.67 (m, 2H), 2.50-2.41 (m, 4H), 2.19-2.11 (m, 1H), 2.05-1.92 (m, 3H), 1.65-1.55 (m, 1H);  $^{13}\text{C}$  NMR (101 MHz,  $\text{CDCl}_3$ )  $\delta$  161.7, 156.0, 146.9, 145.2, 128.2, 126.5, 126.5, 119.8, 117.9, 40.9, 38.7, 28.7, 25.4, 21.9, 20.5, 15.7; HRMS (ESI-TOF)  $m/z$  calcd for  $\text{C}_{16}\text{H}_{17}\text{N}_3\text{ONa}$   $[\text{M}+\text{Na}]^+$  290.1264, found 290.1262.

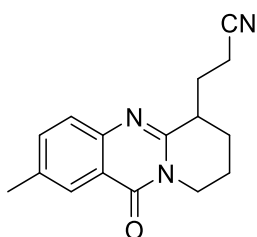

**3-(2-Methyl-11-oxo-6,8,9,11-tetrahydro-7H-pyrido[2,1-*b*]quinazolin-6-yl)propane nitrile (5d)**, 32.0 mg, 60% yield), colorless oil;  $^1\text{H}$  NMR (400 MHz,  $\text{CDCl}_3$ )  $\delta$  8.01 (t,  $J = 1.4$  Hz, 1H), 7.53-7.48 (m, 2H), 4.41-4.34 (m, 1H), 3.86-3.79 (m, 1H), 2.98-2.90 (m, 1H), 2.85-2.66 (m, 2H), 2.51-2.42 (m, 4H), 2.20-2.11 (m, 1H), 2.06-1.94 (m, 3H), 1.63-1.57 (m, 1H);  $^{13}\text{C}$  NMR (101 MHz,  $\text{CDCl}_3$ )  $\delta$  161.8, 155.0, 144.9, 136.7, 135.7, 126.7, 126.0, 120.0, 119.9, 41.0, 38.7, 28.6, 25.4, 21.3, 20.5, 15.7; HRMS (ESI-TOF)  $m/z$  calcd for  $\text{C}_{16}\text{H}_{17}\text{N}_3\text{ONa}$   $[\text{M}+\text{Na}]^+$  290.1264, found 290.1261.

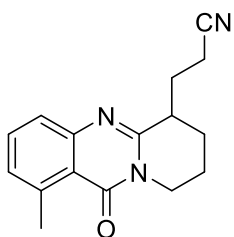

**3-(1-Methyl-11-oxo-6,8,9,11-tetrahydro-7H-pyrido[2,1-*b*]quinazolin-6-yl)propane nitrile (5e)**, 32.2 mg, 60% yield), yellow oil;  $^1\text{H}$  NMR (400 MHz,  $\text{CDCl}_3$ )  $\delta$  7.54-7.51 (m, 1H), 7.42 (dd,  $J = 8.2, 1.4$  Hz, 1H), 7.17-7.15 (m, 1H), 4.30-4.23 (m, 1H), 3.84-3.77 (m, 1H), 2.96-2.89 (m, 1H), 2.85-2.77 (m, 4H), 2.73-2.66 (m, 1H), 2.50-2.41 (m, 1H), 2.18-2.10 (m, 1H), 2.04-1.95 (m, 3H), 1.65-1.55 (m, 1H);  $^{13}\text{C}$  NMR (101 MHz,  $\text{CDCl}_3$ )  $\delta$  162.4, 155.5, 148.4, 140.9, 133.3, 129.1, 125.1, 119.9, 118.9, 40.9, 38.7, 28.7, 25.4, 23.2, 20.6, 15.7; HRMS (ESI-TOF)  $m/z$  calcd for  $\text{C}_{16}\text{H}_{17}\text{N}_3\text{ONa}$   $[\text{M}+\text{Na}]^+$  290.1264, found 290.1265.

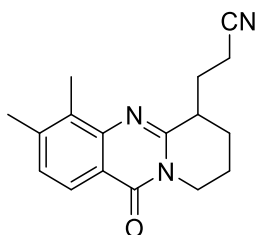

**3-(3,4-Dimethyl-11-oxo-6,8,9,11-tetrahydro-7H-pyrido[2,1-*b*]quinazolin-6-yl)propanenitrile (5f)**, 28.0 mg, 50% yield), colorless oil;  $^1\text{H}$  NMR (400 MHz,  $\text{CDCl}_3$ )  $\delta$  7.99 (d,  $J = 8.1$  Hz, 1H), 7.23 (d,  $J = 8.1$  Hz, 1H), 4.41-4.35 (m, 1H), 3.85-3.78 (m, 1H), 3.02-2.94 (m, 1H), 2.91-2.72 (m, 2H), 2.53-2.44 (m, 4H), 2.41 (s, 3H), 2.21-2.13 (m, 1H), 2.08-1.95 (m, 3H), 1.65-1.56 (m, 1H);  $^{13}\text{C}$  NMR (101 MHz,  $\text{CDCl}_3$ )  $\delta$  162.2, 154.4, 145.1, 143.1, 133.1, 128.6, 123.5, 119.9, 118.2, 40.8, 38.8, 28.7, 25.7, 21.0, 20.6, 15.7, 13.0; HRMS (ESI-TOF)  $m/z$  calcd for  $\text{C}_{17}\text{H}_{19}\text{N}_3\text{ONa}$   $[\text{M}+\text{Na}]^+$  304.1420, found 304.1417.

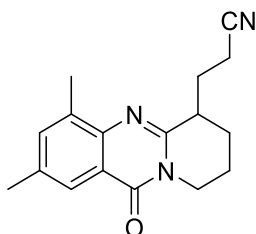

**3-(2,4-Dimethyl-11-oxo-6,8,9,11-tetrahydro-7H-pyrido[2,1-*b*]quinazolin-6-yl)propanenitrile (5g)**, 27.0 mg, 48% yield), colorless oil;  $^1\text{H}$  NMR (400 MHz,  $\text{CDCl}_3$ )  $\delta$  7.88 (s, 1H), 7.39 (s, 1H), 4.42-4.35 (m, 1H), 3.87-3.80 (m, 1H), 2.99-2.87 (m, 2H), 2.81-2.73 (m, 1H), 2.53 (s, 3H), 2.49-2.43 (m, 1H), 2.42 (s, 3H), 2.21-2.13 (m, 1H), 2.06-1.93 (m, 3H), 1.65-1.55 (m, 1H);  $^{13}\text{C}$  NMR (101 MHz,  $\text{CDCl}_3$ )  $\delta$  162.1, 153.7, 143.5, 136.3, 136.1, 135.0, 123.7, 120.0, 119.9, 40.9, 38.7, 28.8, 25.8, 21.3, 20.7, 17.3, 15.8 HRMS (ESI-TOF)  $m/z$  calcd for  $\text{C}_{17}\text{H}_{19}\text{N}_3\text{ONa}$   $[\text{M}+\text{Na}]^+$  304.1420, found 304.1421.

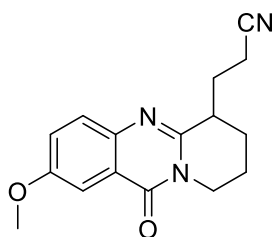

**3-(2-Methoxy-11-oxo-6,8,9,11-tetrahydro-7H-pyrido[2,1-*b*]quinazolin-6-yl)propanenitrile (5h)**, 27.4 mg, 48% yield), yellow oil;  $^1\text{H}$  NMR (400 MHz,  $\text{CDCl}_3$ )  $\delta$  7.58 (t,  $J = 2.4$  Hz, 1H), 7.53 (dd,  $J = 8.9, 1.6$  Hz, 1H), 7.31-7.28 (m, 1H), 4.41-4.34 (m, 1H), 3.91-3.81 (m, 4H), 2.98-2.91 (m, 1H), 2.85-2.66 (m, 2H), 2.50-2.41 (m, 1H), 2.20-2.12 (m, 1H), 2.04-1.95 (m, 3H), 1.65-1.56 (m, 1H);  $^{13}\text{C}$  NMR (101 MHz,  $\text{CDCl}_3$ )  $\delta$  161.7, 158.2, 153.6, 141.6, 128.5, 124.6, 121.0, 119.8, 105.8, 55.8, 41.1, 38.6, 28.7, 25.5, 20.6, 15.7. HRMS (ESI-TOF)  $m/z$  calcd for  $\text{C}_{16}\text{H}_{17}\text{N}_3\text{O}_2\text{Na}$   $[\text{M}+\text{Na}]^+$  306.1213, found 306.1210.

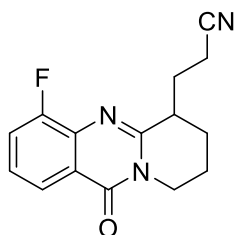

**3-(4-Fluoro-11-oxo-6,8,9,11-tetrahydro-7H-pyrido[2,1-*b*]quinazolin-6-yl)propane nitrile (5i)**, 35.3 mg, 65% yield), yellow solid, mp: 152-154 °C; <sup>1</sup>H NMR (400 MHz, CDCl<sub>3</sub>) δ 7.97 (dd, *J* = 7.8, 3.0 Hz, 1H), 7.42-7.31 (m, 2H), 4.37-4.29 (m, 1H), 3.89-3.82 (m, 1H), 3.02-2.87 (m, 2H), 2.78-2.70 (m, 1H), 2.52-2.43 (m, 1H), 2.22-2.14 (m, 1H), 2.07-1.95 (m, 3H), 1.67-1.57 (m, 1H); <sup>13</sup>C NMR (101 MHz, CDCl<sub>3</sub>) δ 160.9 (d, *J*<sub>C-F</sub> = 3.2 Hz), 156.7 (d, *J*<sub>C-F</sub> = 256.5 Hz), 156.7, 136.5 (d, *J*<sub>C-F</sub> = 11.8 Hz), 126.4 (d, *J*<sub>C-F</sub> = 7.6 Hz), 122.2, 122.1 (d, *J*<sub>C-F</sub> = 4.4 Hz), 119.8, 119.4 (d, *J*<sub>C-F</sub> = 18.8 Hz), 41.3, 39.0, 28.7, 25.4, 20.5, 15.8; HRMS (ESI-TOF) *m/z* calcd for C<sub>15</sub>H<sub>14</sub>FN<sub>3</sub>ONa [M+Na]<sup>+</sup> 294.1013, found 294.1011.

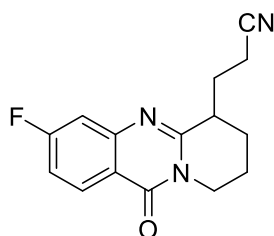

**3-(3-Fluoro-11-oxo-6,8,9,11-tetrahydro-7H-pyrido[2,1-*b*]quinazolin-6-yl)propane nitrile (5j)**, 34.2 mg, 63% yield), yellow oil; <sup>1</sup>H NMR (300 MHz, CDCl<sub>3</sub>) δ 8.19 (dd, *J* = 8.9, 6.1 Hz, 1H), 7.19 (dd, *J* = 9.3, 2.9 Hz, 1H), 7.12-7.05 (m, 1H), 4.36-4.27 (m, 1H), 3.82-3.73 (m, 1H), 2.96-2.86 (m, 1H), 2.82-2.58 (m, 2H), 2.47-2.36 (m, 1H), 2.18-2.06 (m, 1H), 2.02-1.89 (m, 3H), 1.63-1.50 (m, 1H); <sup>13</sup>C NMR (75 MHz, CDCl<sub>3</sub>) δ 166.4 (d, *J*<sub>C-F</sub> = 252.5 Hz), 161.1, 157.5, 148.9 (d, *J*<sub>C-F</sub> = 13.1 Hz), 129.5 (d, *J*<sub>C-F</sub> = 10.6 Hz), 119.7, 117.0 (d, *J*<sub>C-F</sub> = 2.0 Hz), 115.5 (d, *J*<sub>C-F</sub> = 23.5 Hz), 112.0 (d, *J*<sub>C-F</sub> = 21.5 Hz), 41.0, 38.8, 28.5, 25.3, 20.4, 15.7; HRMS (ESI-TOF) *m/z* calcd for C<sub>15</sub>H<sub>14</sub>FN<sub>3</sub>ONa [M+Na]<sup>+</sup> 294.1013, found 294.1015.

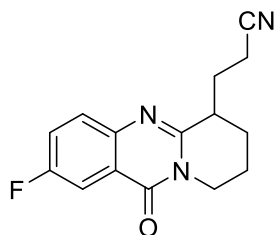

**3-(2-Fluoro-11-oxo-6,8,9,11-tetrahydro-7H-pyrido[2,1-*b*]quinazolin-6-yl)propane nitrile (5k)**, 32.4 mg, 60% yield), yellow solid; mp: 148-149 °C <sup>1</sup>H NMR (400 MHz, CDCl<sub>3</sub>) δ 7.86-7.82 (m, 1H), 7.64-7.60 (m, 1H), 7.45-7.40 (m, 1H), 4.41-4.34 (m, 1H), 3.88-3.81 (m, 1H), 3.01-2.94 (m, 1H), 2.85-2.66 (m, 2H), 2.52-2.43 (m, 1H), 2.22-2.13 (m, 1H), 2.08-1.94 (m, 3H), 1.67-1.58 (m, 1H); <sup>13</sup>C NMR (101 MHz, CDCl<sub>3</sub>) δ 161.1 (d, *J*<sub>C-F</sub> = 3.4 Hz), 160.7 (d, *J*<sub>C-F</sub> = 248.5 Hz), 155.4, 143.4, 129.2 (d, *J*<sub>C-F</sub> = 8.1 Hz), 122.9 (d, *J*<sub>C-F</sub> = 24.2 Hz), 121.4 (d, *J*<sub>C-F</sub> = 8.8 Hz), 119.7, 111.4 (d, *J*<sub>C-F</sub> = 23.5 Hz), 41.2, 38.6, 28.6, 25.3, 20.4, 15.7; HRMS (ESI-TOF) *m/z* calcd for



C<sub>15</sub>H<sub>14</sub>FN<sub>3</sub>ONa [M+Na]<sup>+</sup> 294.1013, found 294.1010.

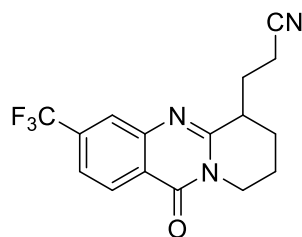

**3-(11-Oxo-3-(trifluoromethyl)-6,8,9,11-tetrahydro-7H-pyrido[2,1-*b*]quinazolin-6-yl)propanenitrile (51)**, 33.8 mg, 53% yield), colourless oil; <sup>1</sup>H NMR (400 MHz, CDCl<sub>3</sub>) δ 8.32 (d, *J* = 8.4 Hz, 1H), 7.87 (s, 1H), 7.60 (dd, *J* = 8.3, 1.8 Hz, 1H), 4.43-4.36 (m, 1H), 3.88-3.81 (m, 1H), 3.02-2.94 (m, 1H), 2.88-2.80 (m, 1H), 2.74-2.66 (m, 1H), 2.53-2.44 (m, 1H), 2.24-2.16 (m, 1H), 2.10-1.95 (m, 3H), 1.67-1.58 (m, 1H); <sup>13</sup>C NMR (75 MHz, CDCl<sub>3</sub>) δ 161.0, 157.6, 146.8, 135.7 (q, *J*<sub>C-F</sub> = 32.6 Hz), 127.9, 124.5 (q, *J*<sub>C-F</sub> = 4.0 Hz), 123.4 (q, *J*<sub>C-F</sub> = 271.4 Hz), 122.5, 122.4 (q, *J*<sub>C-F</sub> = 3.4 Hz), 119.6, 41.2, 38.8, 28.4, 25.3, 20.4, 15.7; HRMS (ESI-TOF) *m/z* calcd for C<sub>16</sub>H<sub>14</sub>F<sub>3</sub>N<sub>3</sub>ONa [M+Na]<sup>+</sup> 344.0981, found 344.0982.

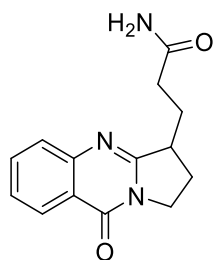

**3-(9-Oxo-1,2,3,9-tetrahydropyrrolo[2,1-*b*]quinazolin-3-yl)propanamide (7)**, 43.6 mg, 85% yield), white solid, mp: 233-235 °C; <sup>1</sup>H NMR (400 MHz, DMSO-*d*<sub>6</sub>) δ 8.26 (dd, *J* = 8.0, 1.5 Hz, 1H), 7.95-7.91 (m, 1H), 7.79 (d, *J* = 7.8 Hz, 1H), 7.64-7.60 (m, 1H), 7.50 (s, 1H), 6.95 (s, 1H), 4.30-4.24 (m, 1H), 4.07-4.00 (m, 1H), 3.42-3.35 (m, 1H), 2.56-2.48 (m, 1H), 2.44-2.38 (m, 3H), 2.03-1.93 (m, 1H), 1.89-1.81 (m, 1H); <sup>13</sup>C NMR (75 MHz, DMSO-*d*<sub>6</sub>) δ 174.4, 162.5, 160.4, 149.5, 134.5, 127.3, 126.5, 126.1, 120.8, 45.1, 43.1, 32.9, 27.8, 26.2; HRMS (ESI-TOF) *m/z* calcd for C<sub>14</sub>H<sub>15</sub>N<sub>3</sub>O<sub>2</sub>Na [M+Na]<sup>+</sup> 280.1056, found 280.1053.

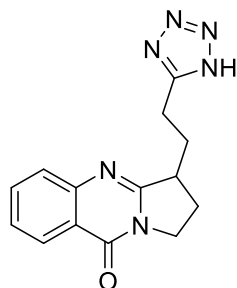

**3-(2-(2H-Tetrazol-5-yl)ethyl)-2,3-dihydropyrrolo[2,1-*b*]quinazolin-9(1H)-one (8)**, 28.0 mg, 50% yield), colorless oil; <sup>1</sup>H NMR (400 MHz, CDCl<sub>3</sub>) δ 8.23 (dd, *J* = 8.0, 1.5 Hz, 1H), 7.76-7.71 (m, 1H), 7.65 (dd, *J* = 8.2, 1.2 Hz, 1H), 7.50-7.46 (m, 1H), 4.27-4.20 (m, 1H), 4.13-4.07 (m, 1H), 3.70 (s, 1H), 2.83-2.67 (m, 2H), 2.52-2.33 (m, 3H), 2.23-2.15 (m, 2H); <sup>13</sup>C NMR (75 MHz, CDCl<sub>3</sub>) δ 166.0, 165.1, 154.1, 139.5,

132.5, 131.8, 131.0, 126.1, 83.0, 48.0, 38.5, 37.7, 16.4; HRMS (ESI-TOF)  $m/z$  calcd for  $C_{14}H_{14}N_6ONa$   $[M+Na]^+$  305.1121, found 305.1124.

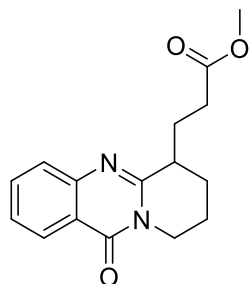

**Methyl 3-(11-oxo-6,8,9,11-tetrahydro-7H-pyrido[2,1-*b*]quinazolin-6-yl)propanoate (9)**, 50.4 mg, 88% yield), colourless oil;  $^1H$  NMR (400 MHz,  $CDCl_3$ )  $\delta$  8.22 (d,  $J = 8.1$  Hz, 1H), 7.70-7.66 (m, 1H), 7.60 (d,  $J = 8.3$  Hz, 1H), 7.42-7.37 (m, 1H), 4.30-4.23 (m, 1H), 3.92-3.85 (m, 1H), 3.62 (s, 3H), 2.95-2.88 (m, 1H), 2.61-2.56 (m, 2H), 2.47-2.38 (m, 1H), 2.15-2.07 (m, 1H), 2.05-1.93 (m, 3H), 1.67-1.58 (m, 1H);  $^{13}C$  NMR (101 MHz,  $CDCl_3$ )  $\delta$  173.9, 162.1, 156.9, 147.1, 134.0, 126.9, 126.6, 126.2, 120.2, 51.6, 41.5, 39.5, 31.8, 28.3, 25.1, 20.2; HRMS (ESI-TOF)  $m/z$  calcd for  $C_{16}H_{18}N_2O_3Na$   $[M+Na]^+$  309.1210, found 309.1213.

## 5. References

1. (a) J. Yang, B. Sun, H. Ding, P.-Y. Huang, X.-L. Tang, R.-C. Shi, Z.-Y. Yan, C.-M. Yu and C. Jin, *Green Chem.*, 2021, **23**, 575. (b) B. Sun, P. Huang, Z. Yan, X. Shi, X. Tang, J. Yang and C. Jin, *Org. Lett.*, 2021, **23**, 1026.
2. J. N. Moorthy and N. Singhal, *J. Org. Chem.*, 2005, **70**, 1926.
3. B. Akhlaghinia and S. Rezazadeh, *J. Braz. Chem. Soc.*, 2012, **23**, 2197.
4. Y. Yu, Z. Cai, W. Yuan, P. Liu and P. Sun, *J. Org. Chem.*, 2017, **82**, 8148.

## 6. Copies of the $^1\text{H}$ NMR and $^{13}\text{C}$ NMR Spectra

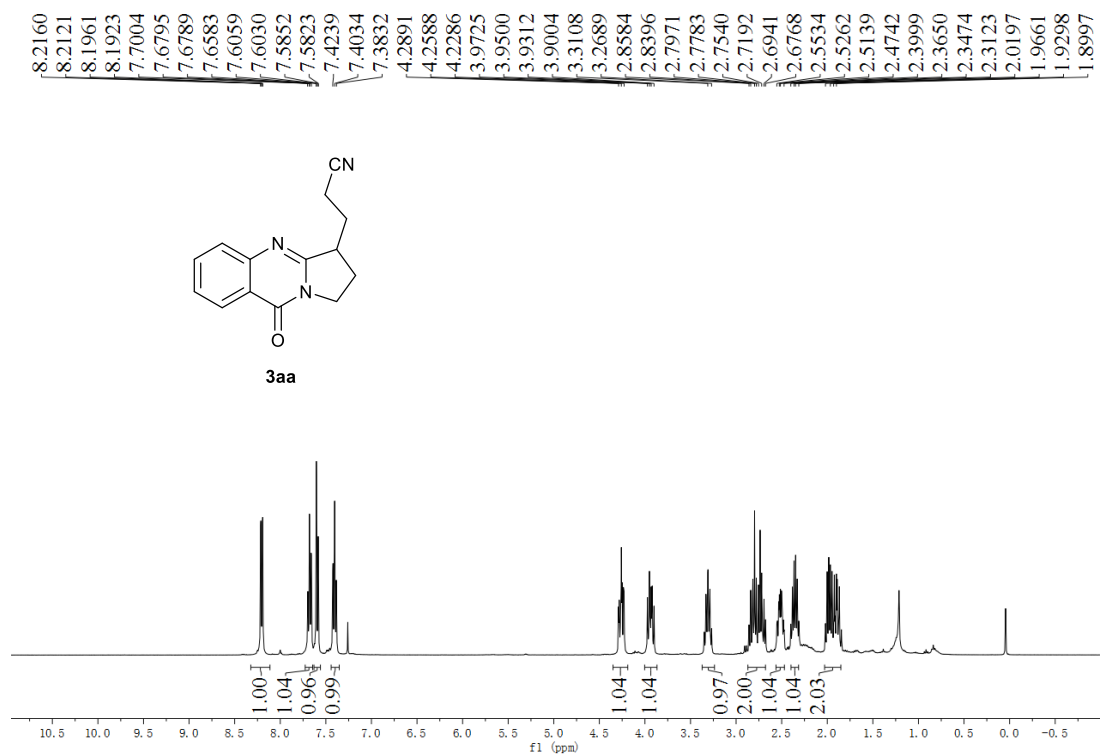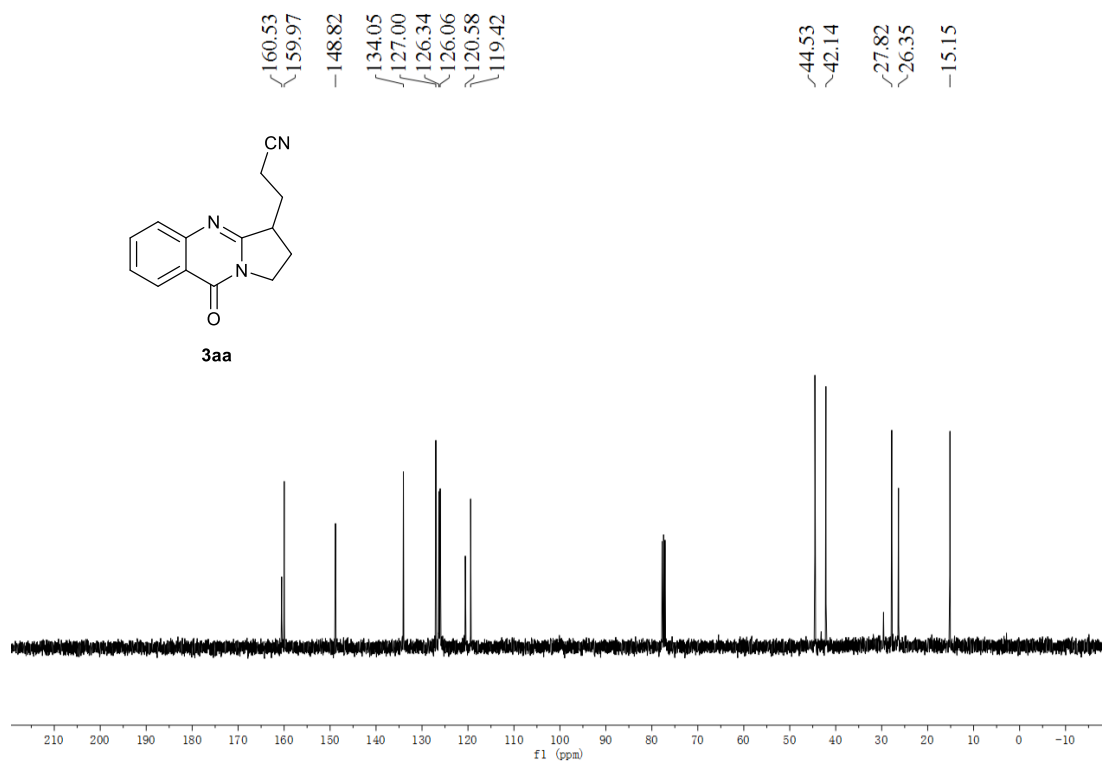

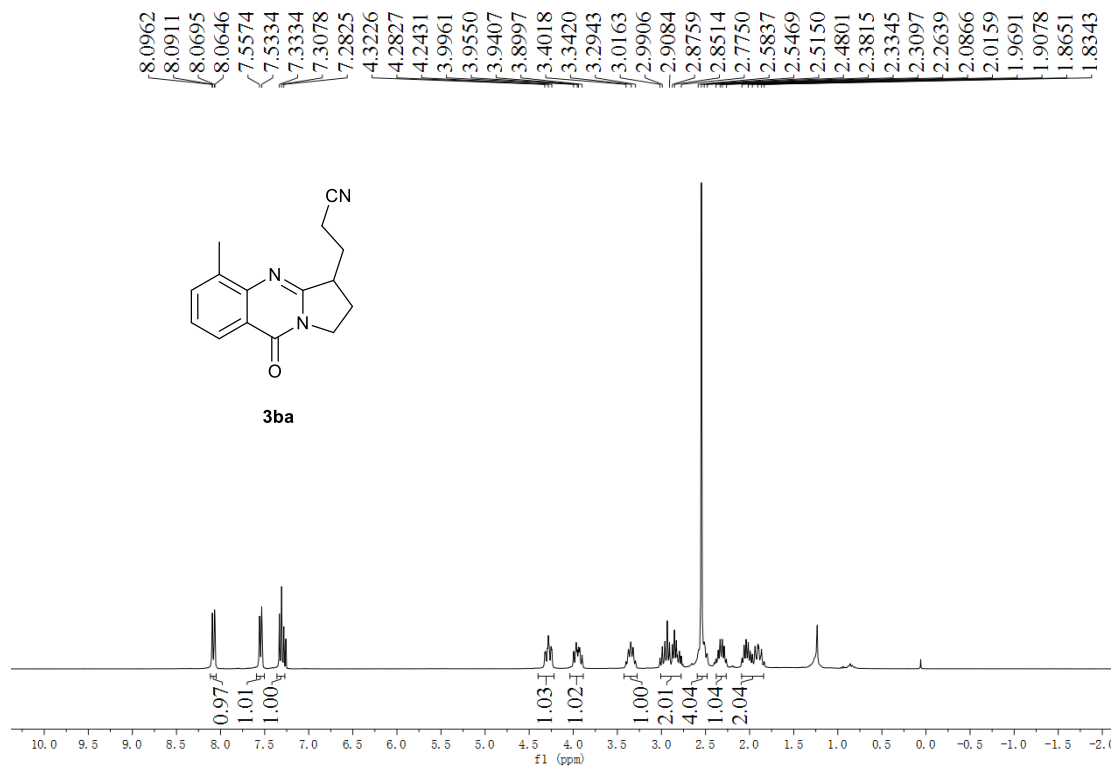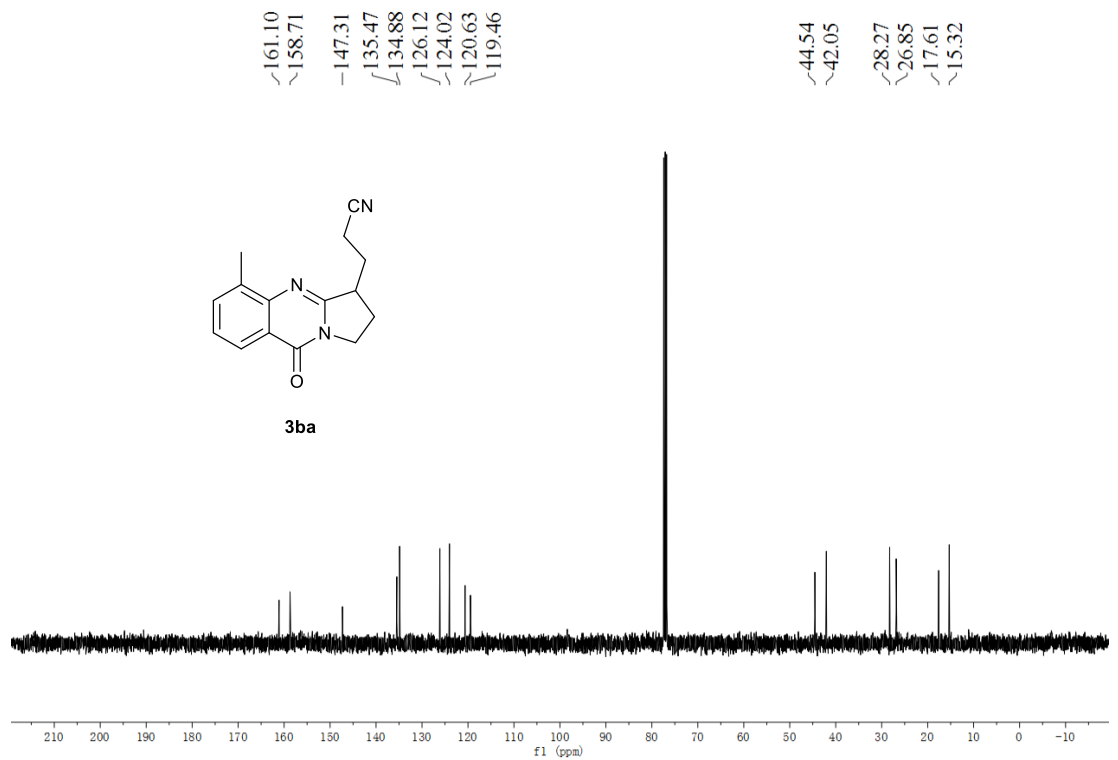

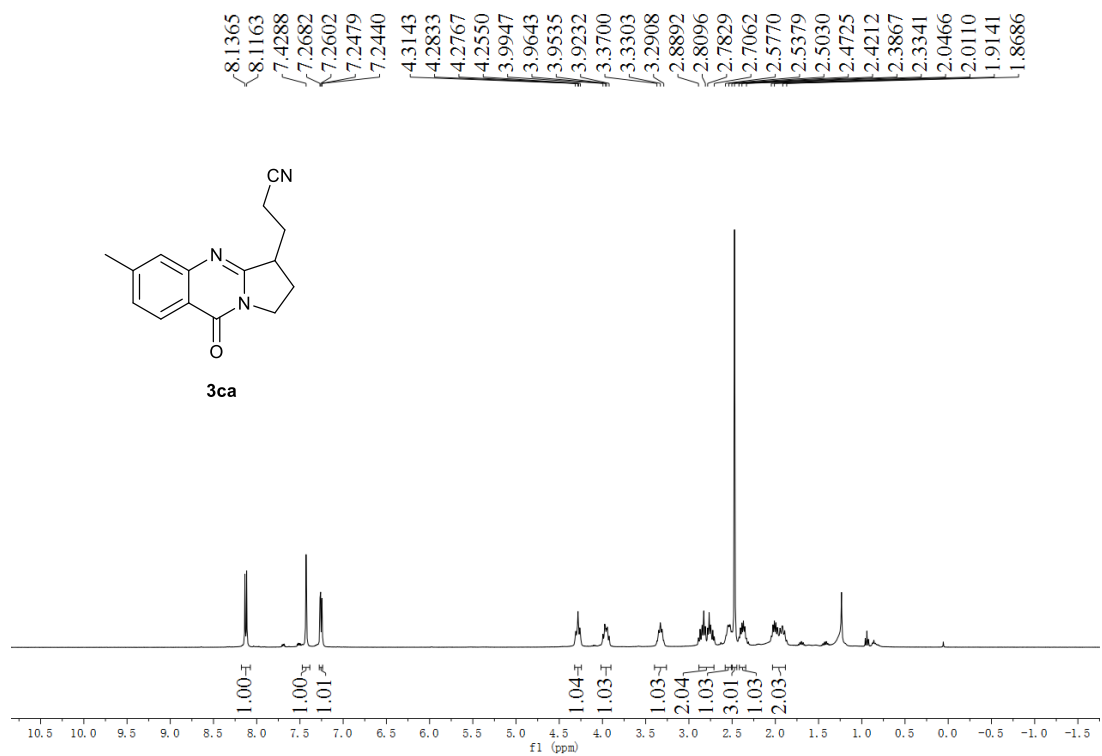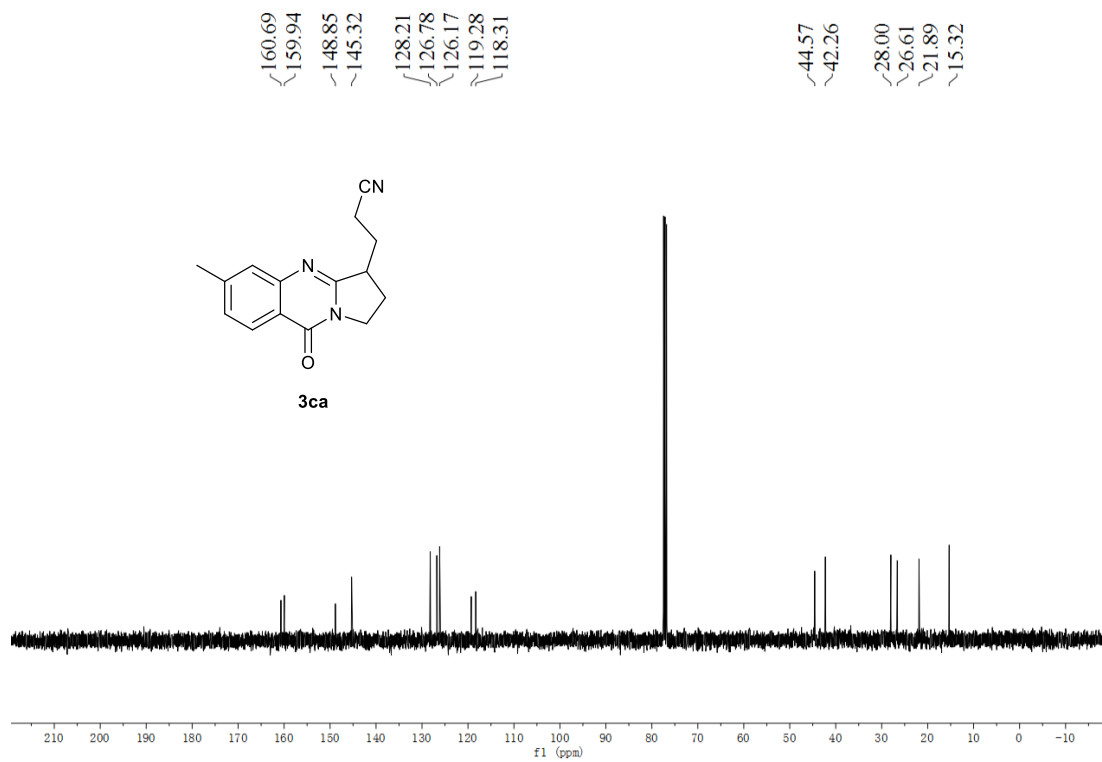

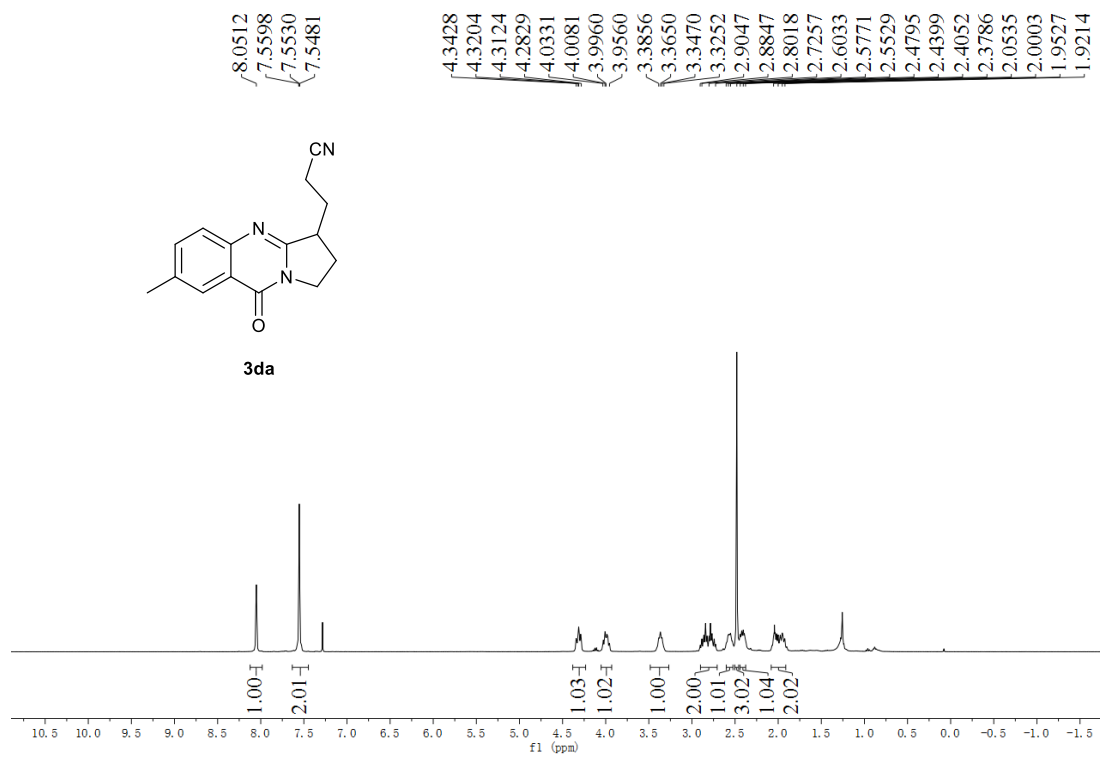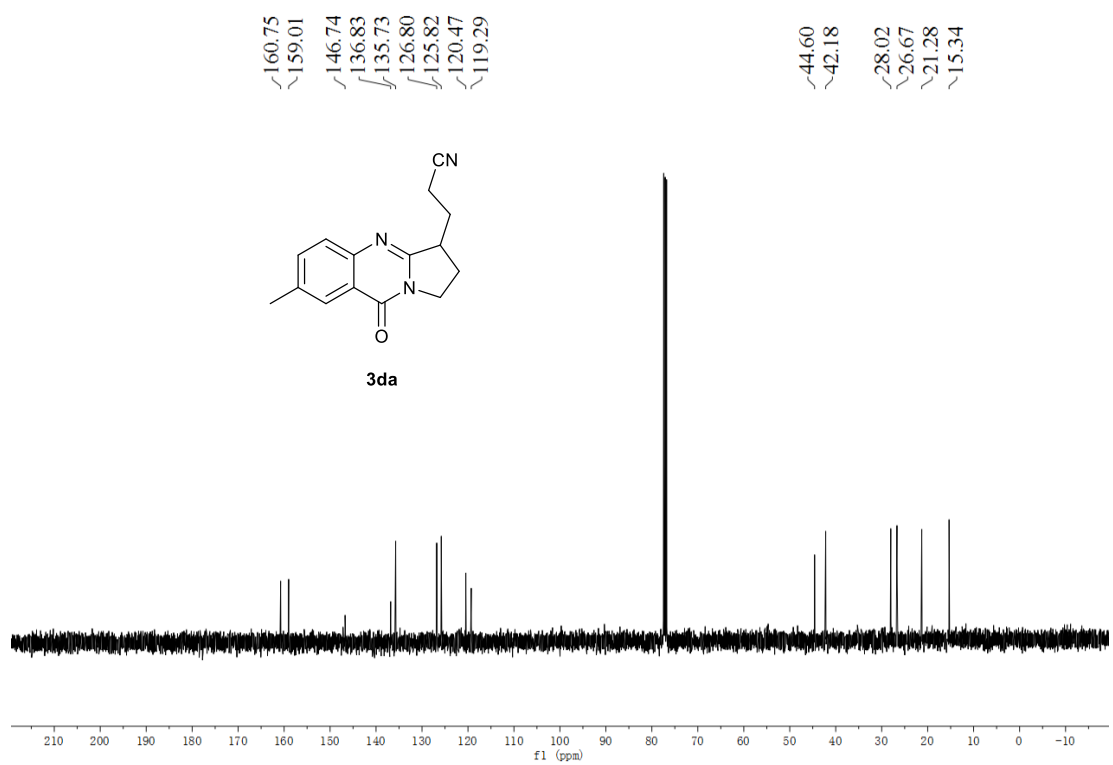

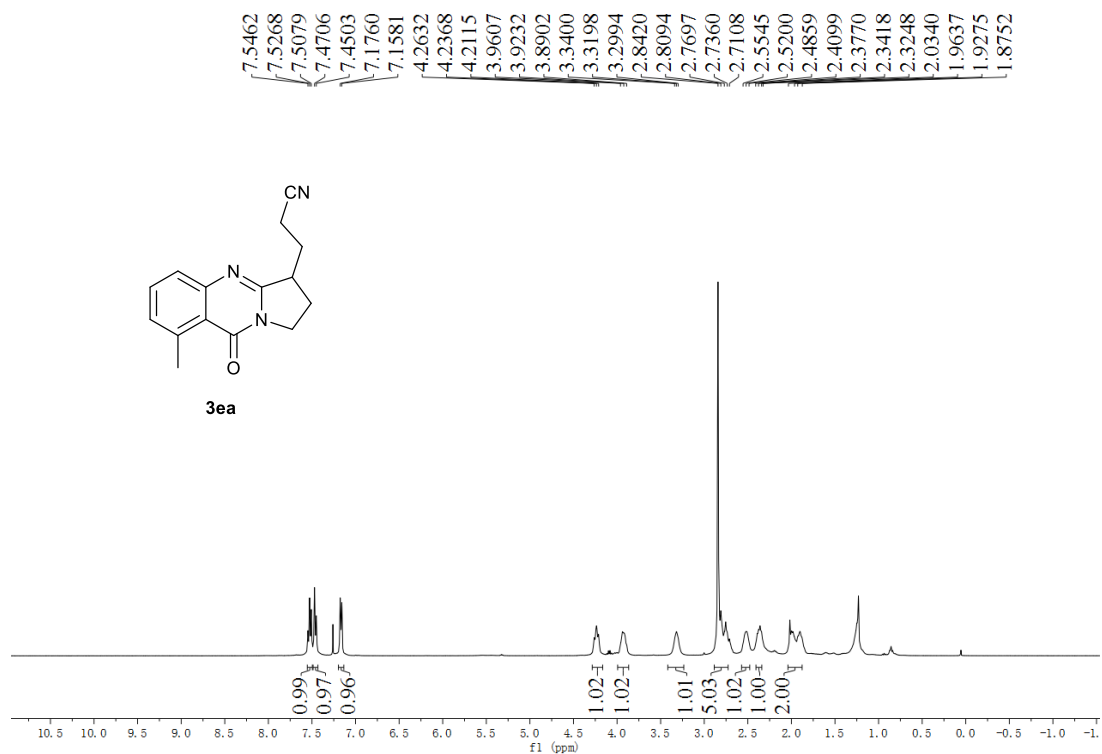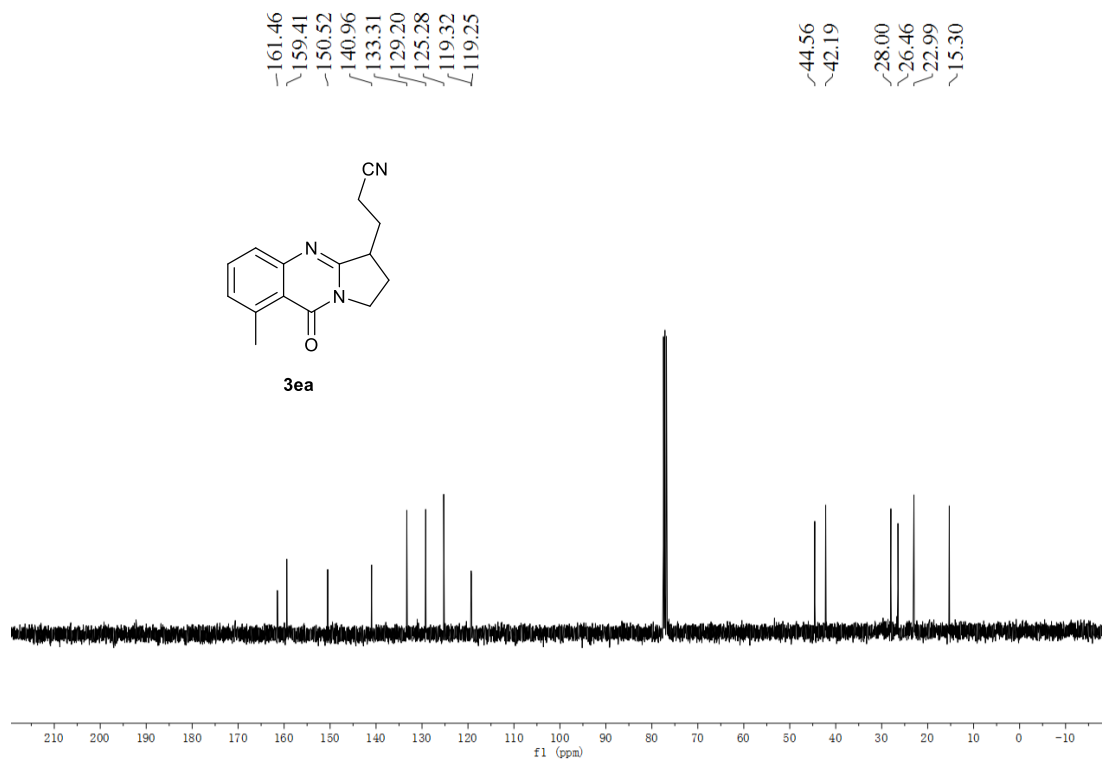



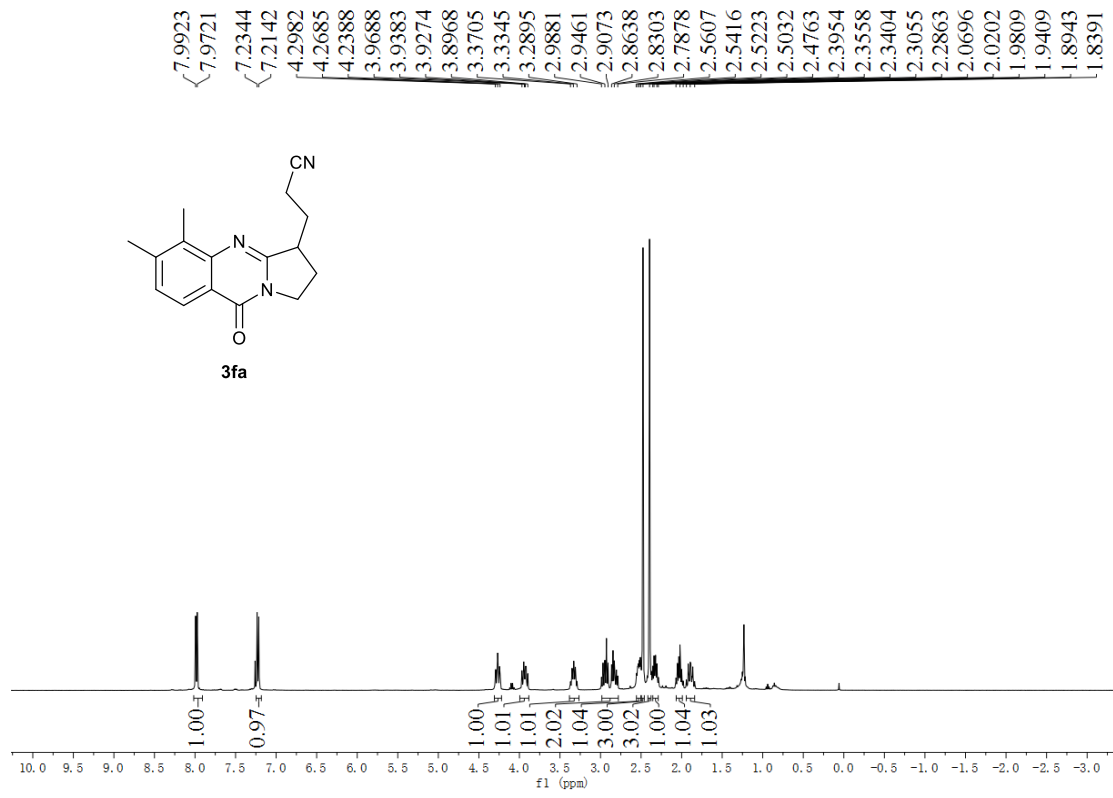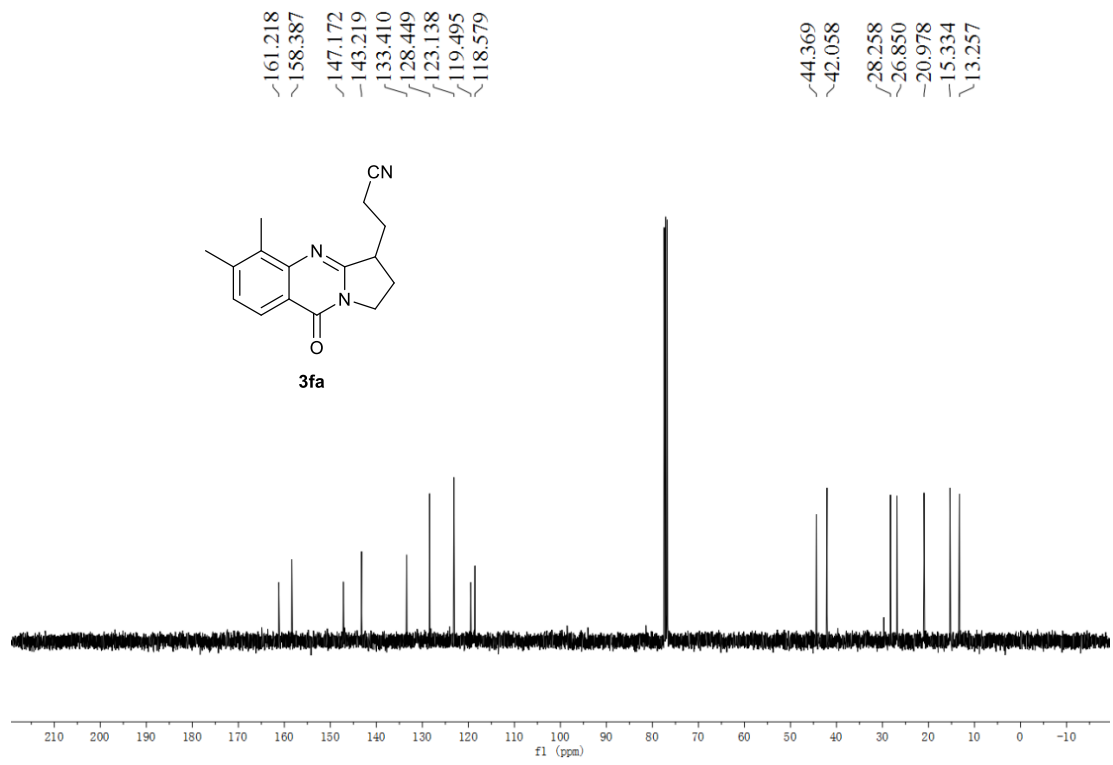

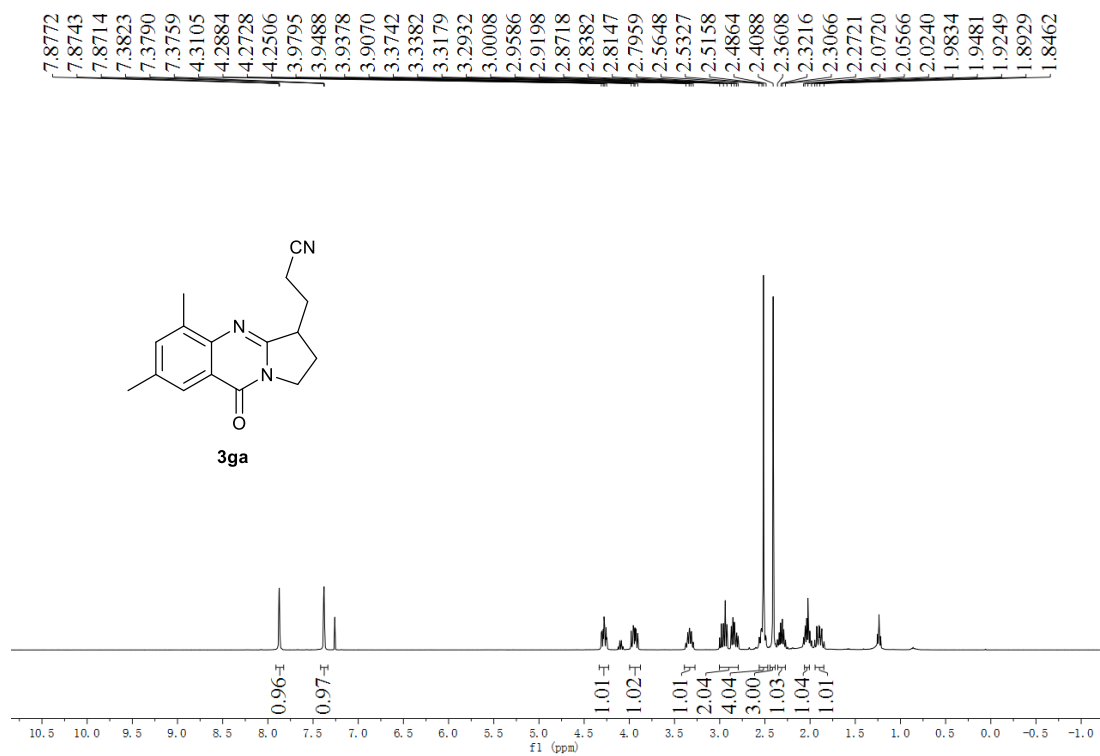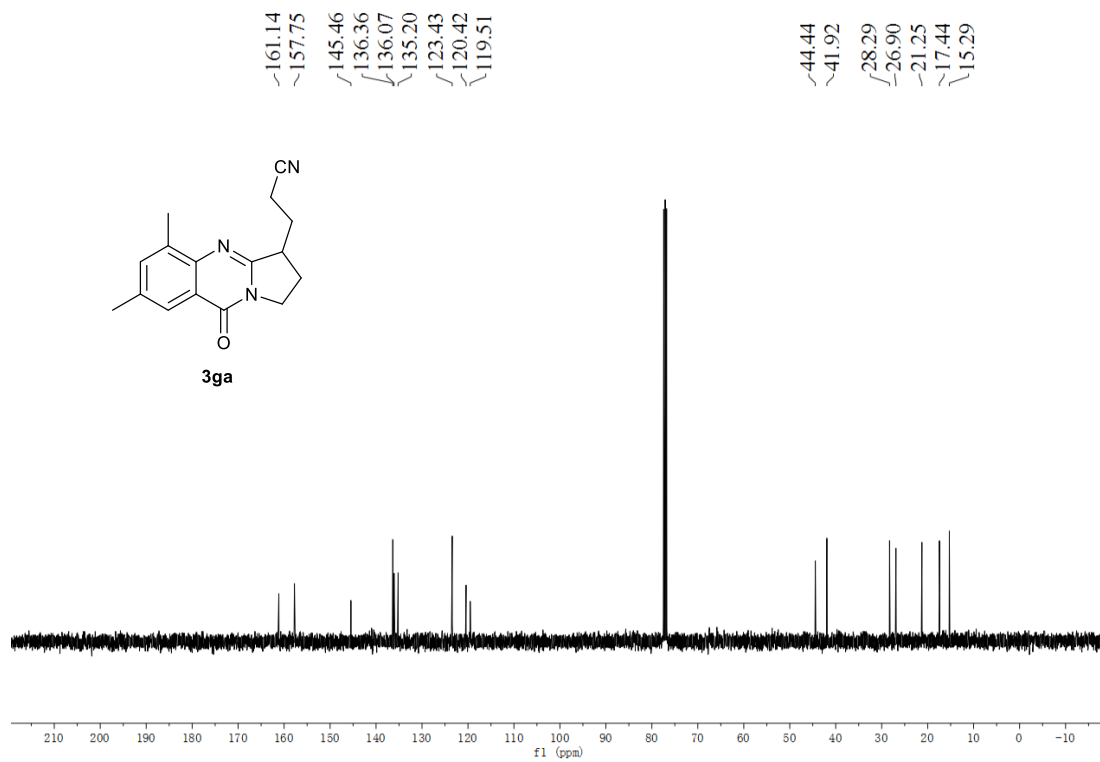

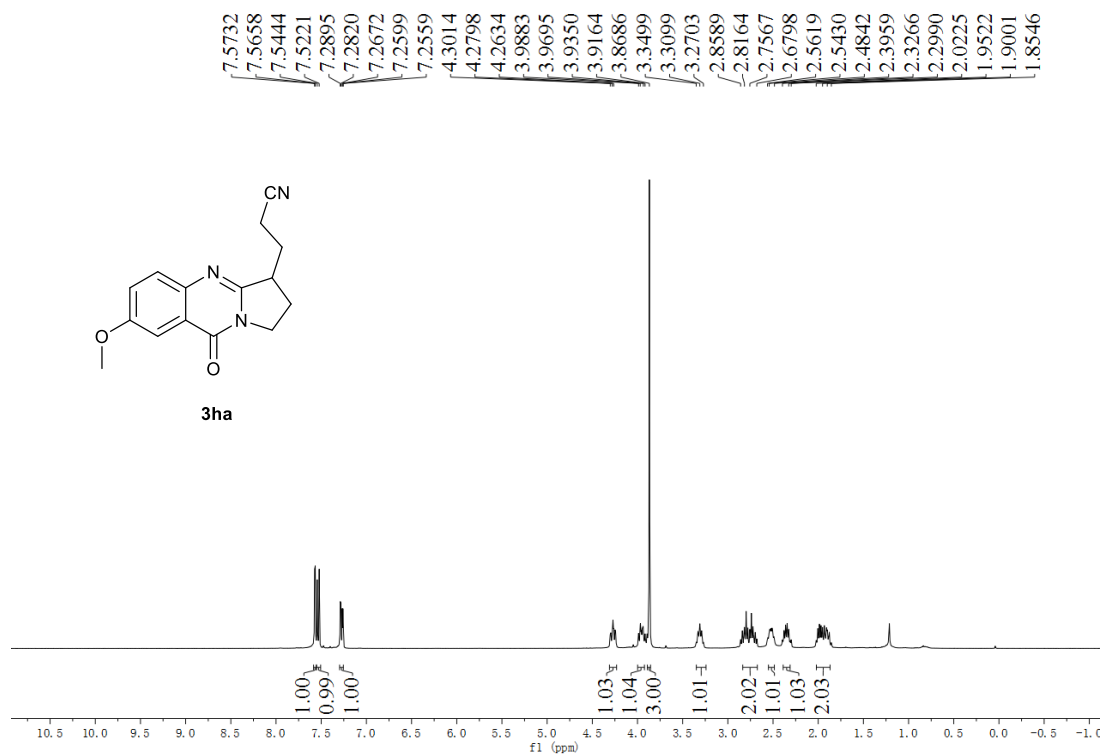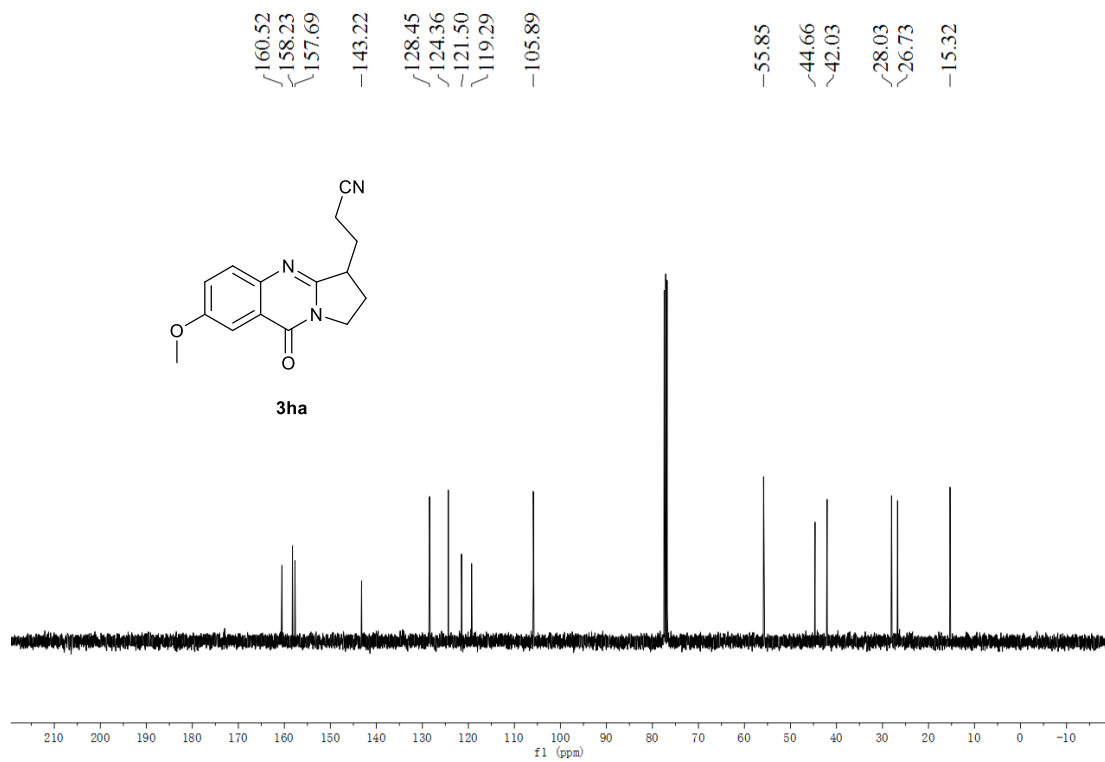

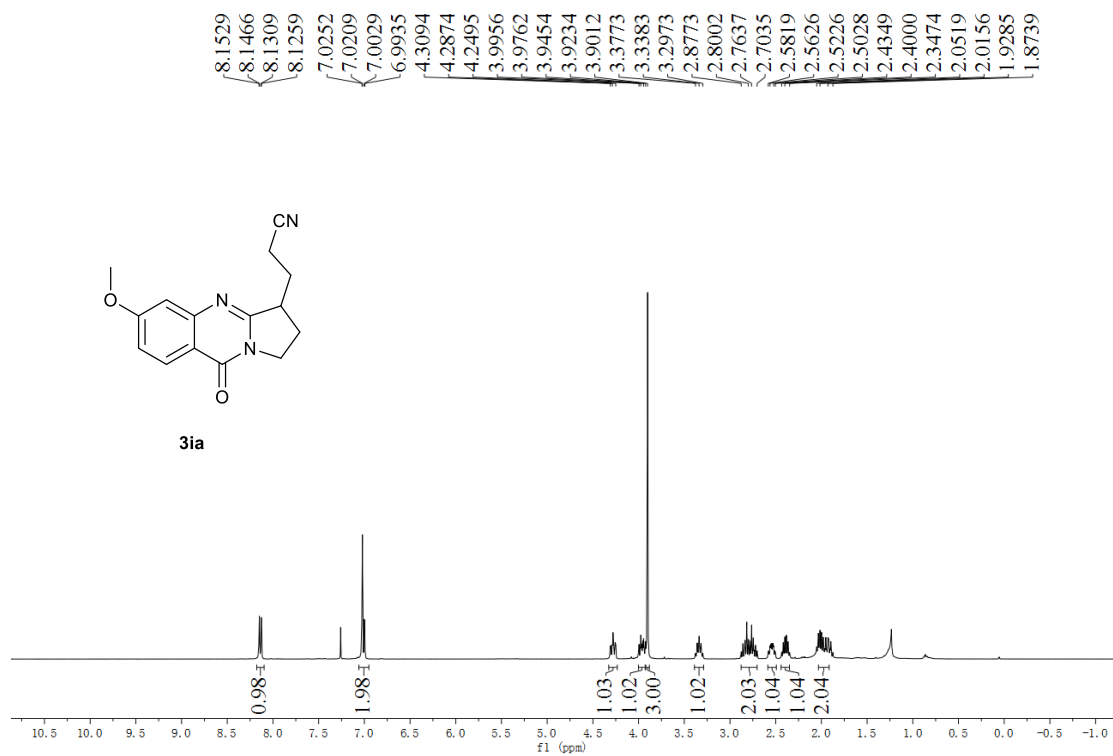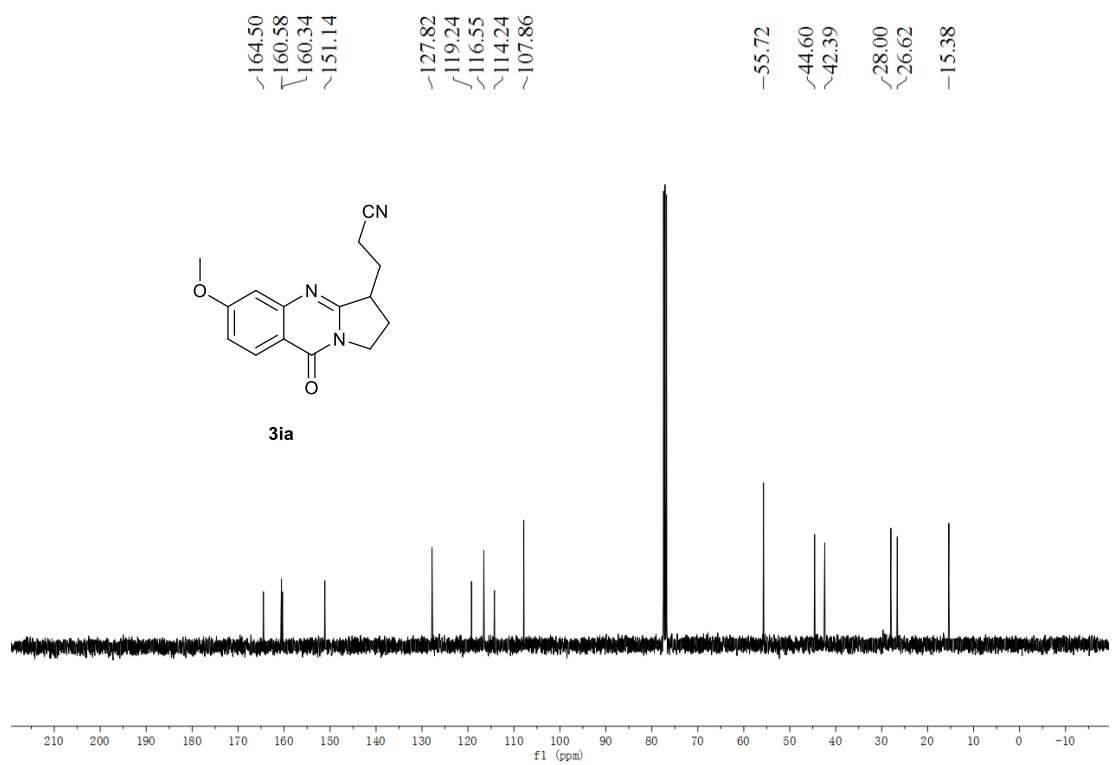

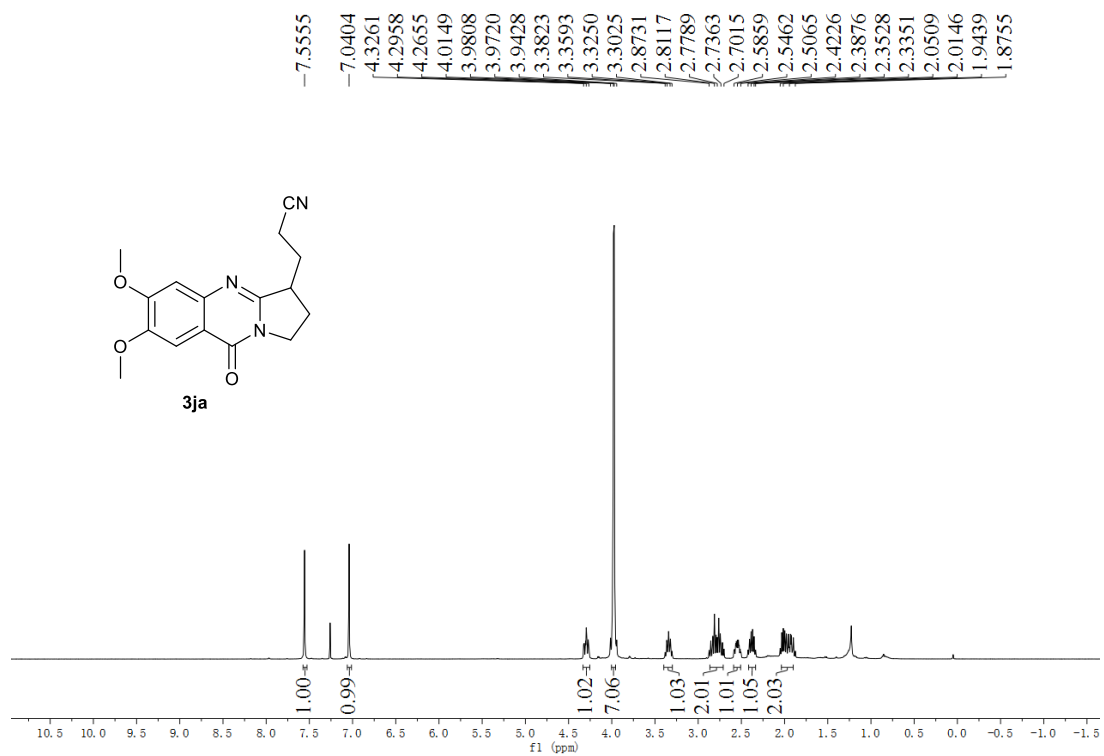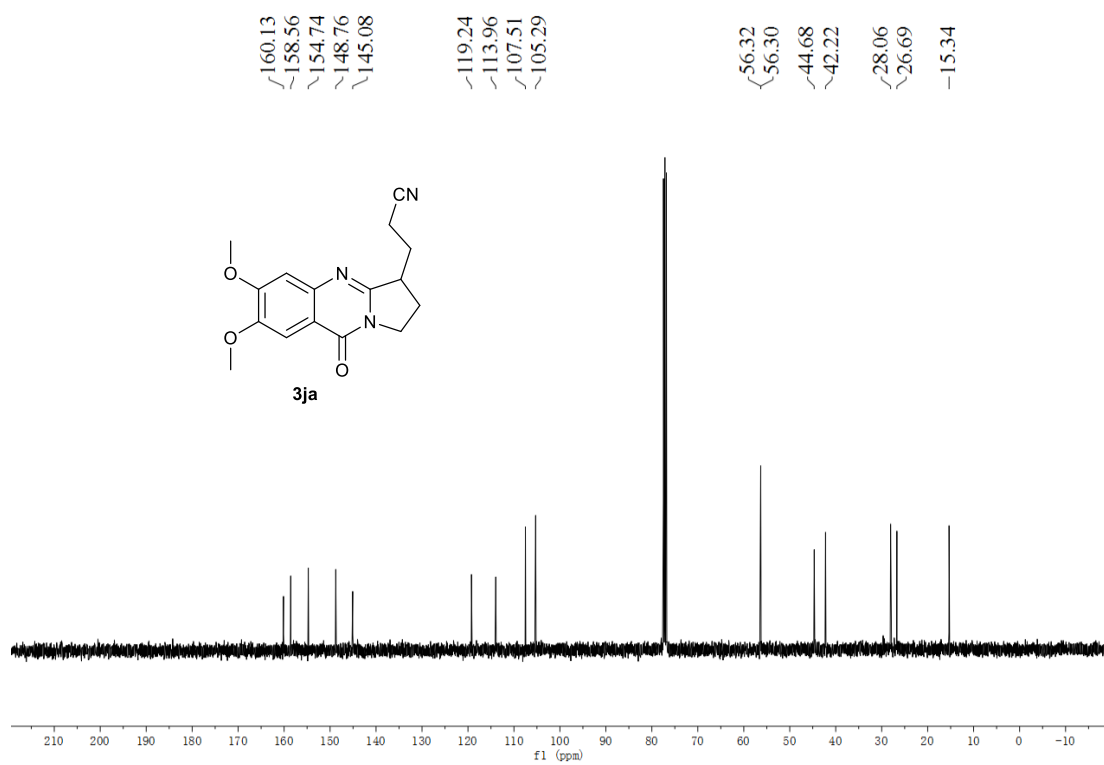

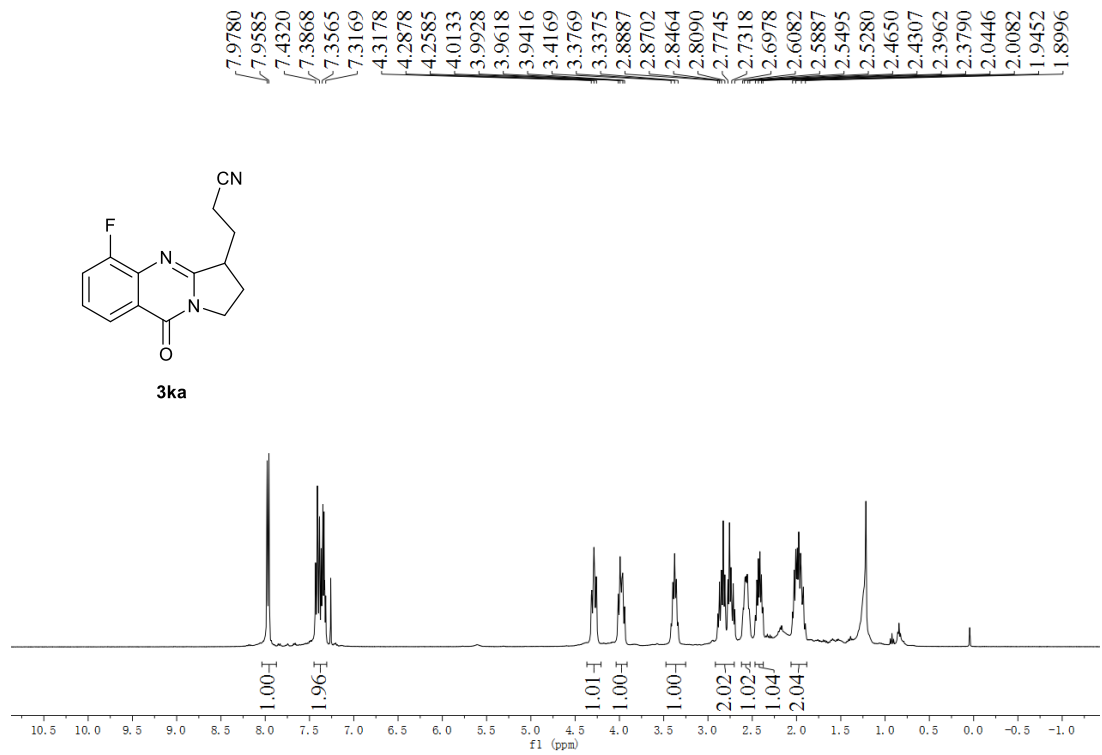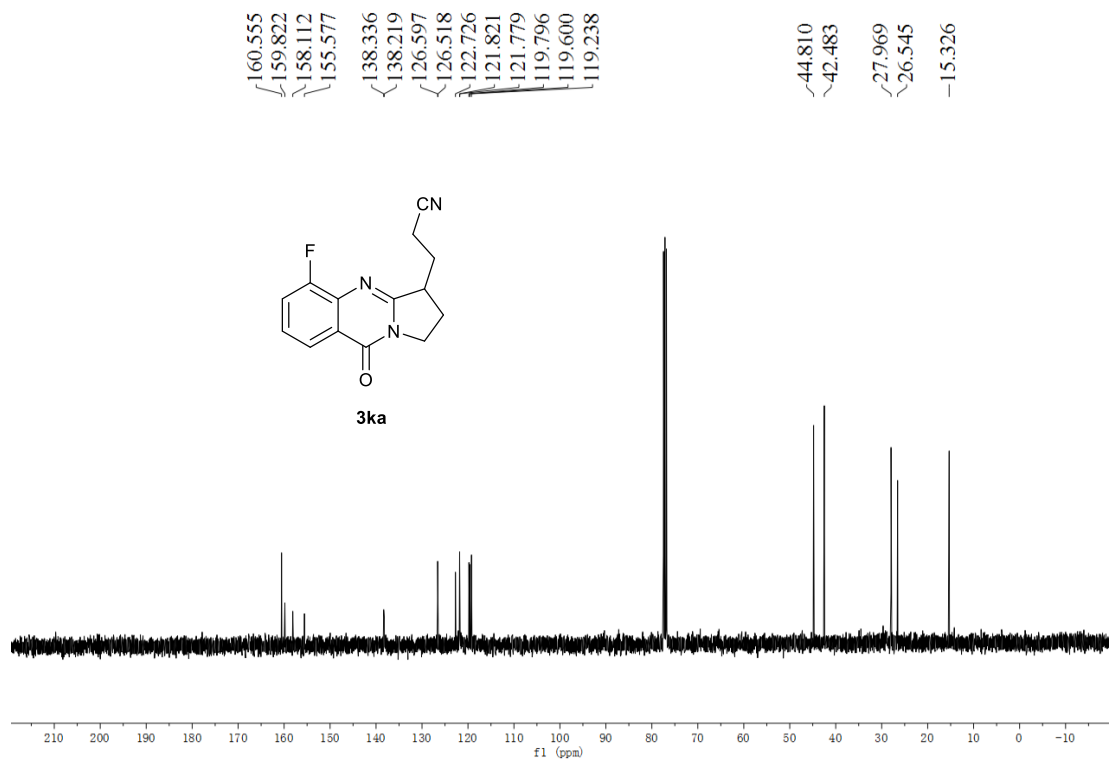

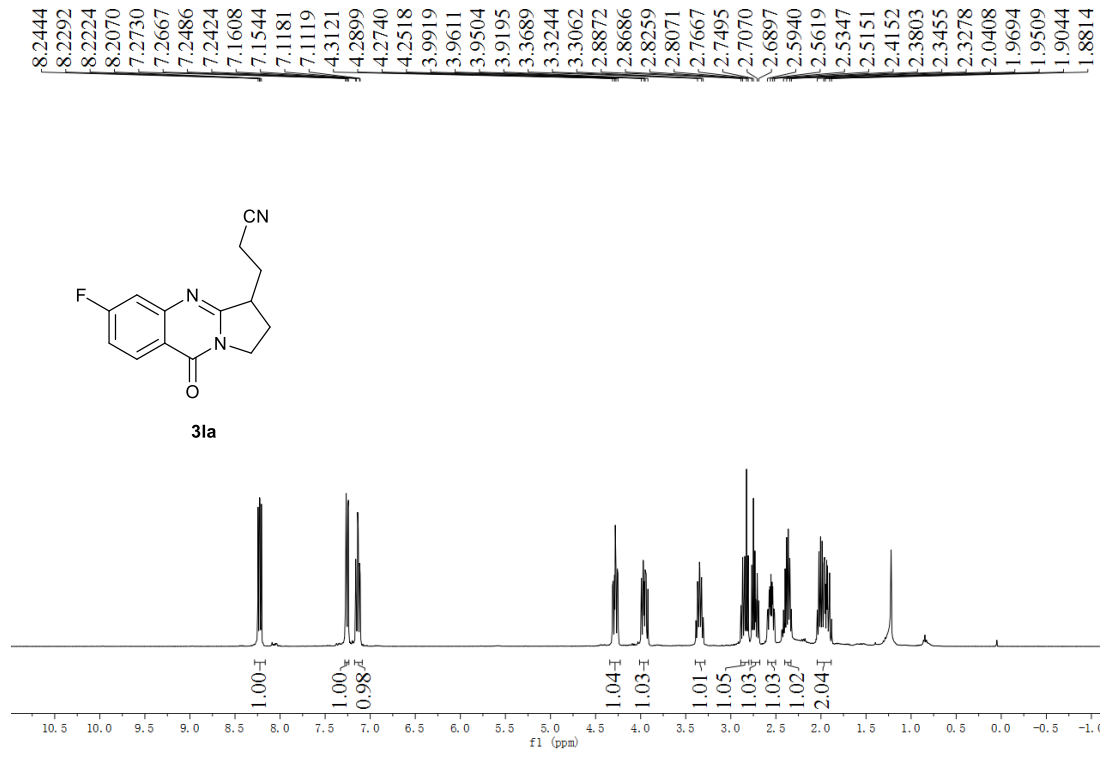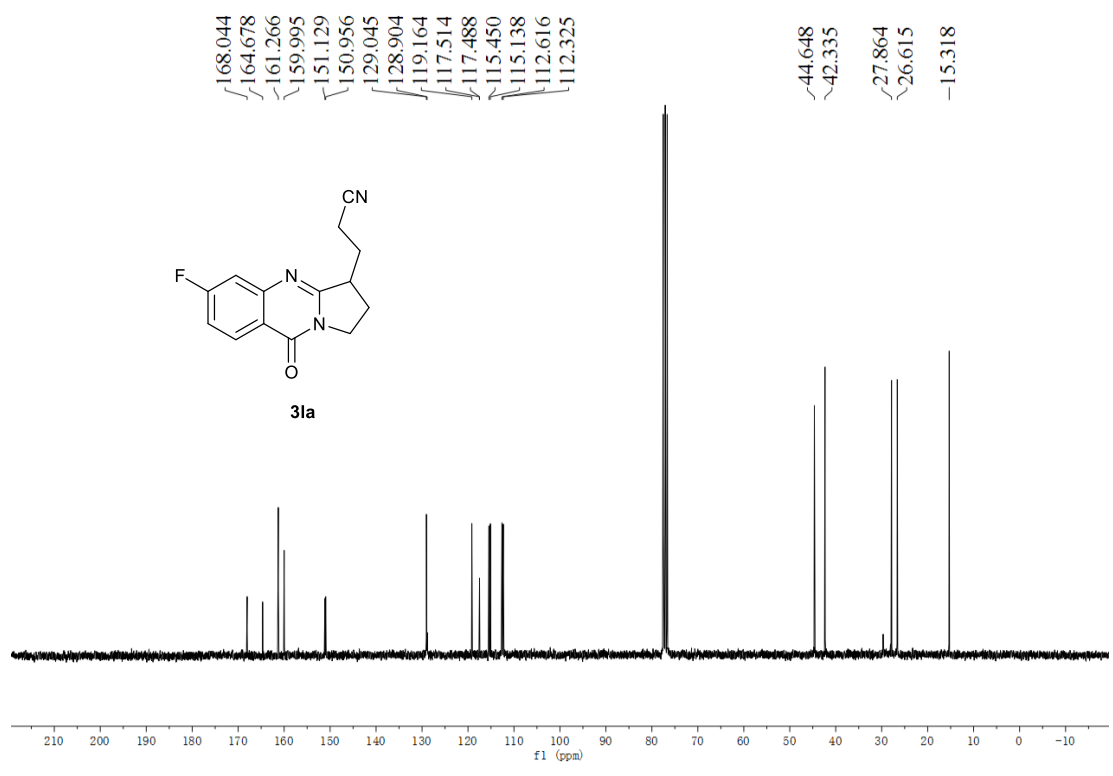

7.8814  
7.8740  
7.8602  
7.8528  
7.6595  
7.6474  
7.6372  
7.6251  
7.4574  
7.4290  
7.4075  
4.3339  
4.3037  
4.2737  
4.0141  
3.9832  
3.9632  
3.9418  
3.3946  
3.3545  
3.3145  
2.8992  
2.8805  
2.8193  
2.7835  
2.7663  
2.7067  
2.6067  
2.5799  
2.5558  
2.5283  
2.4271  
2.3925  
2.3749  
2.3400  
2.0567  
1.9857  
1.9168  
1.8938

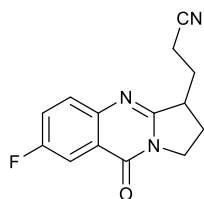

3ma

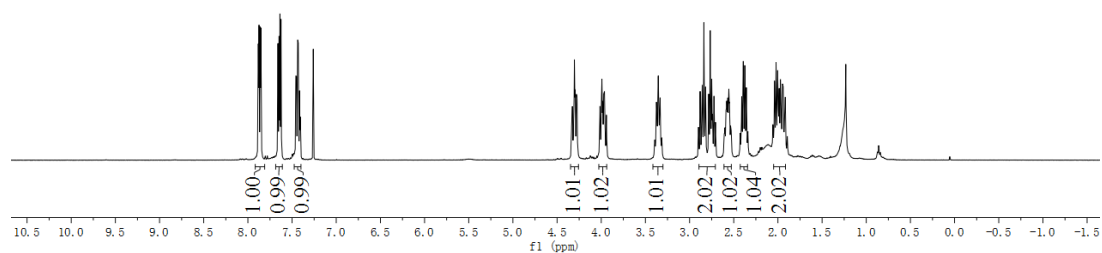

161.934  
160.002  
159.967  
159.469  
159.346  
159.324  
145.398  
145.378  
129.400  
129.318  
122.868  
122.629  
122.061  
121.976  
119.209  
111.396  
111.162

44.693  
42.120  
27.921  
26.672  
15.321

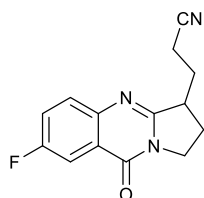

3ma

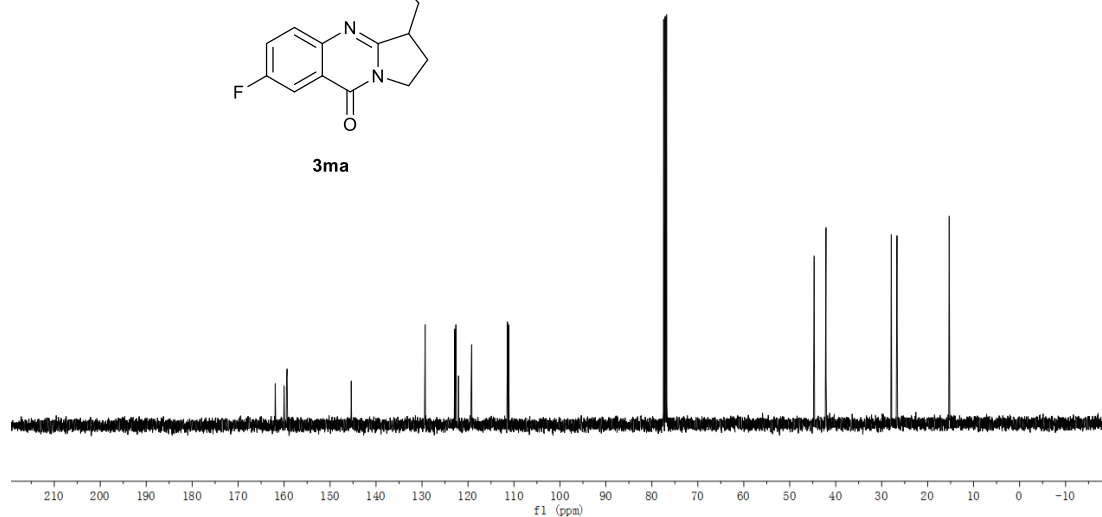



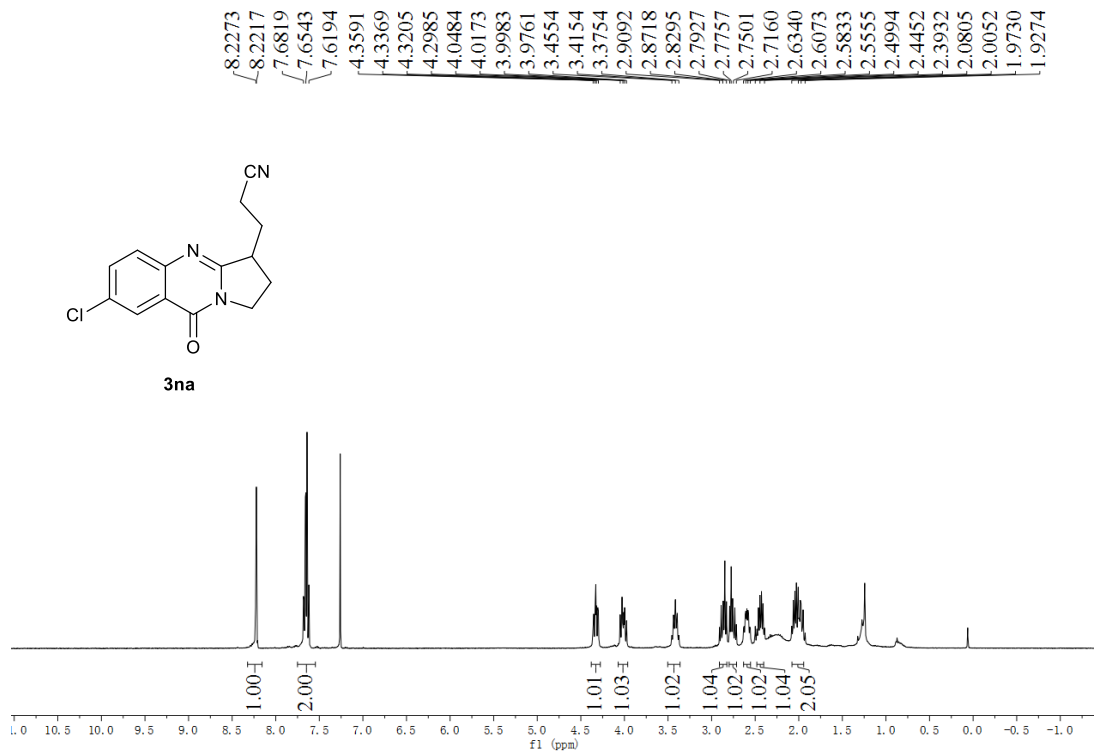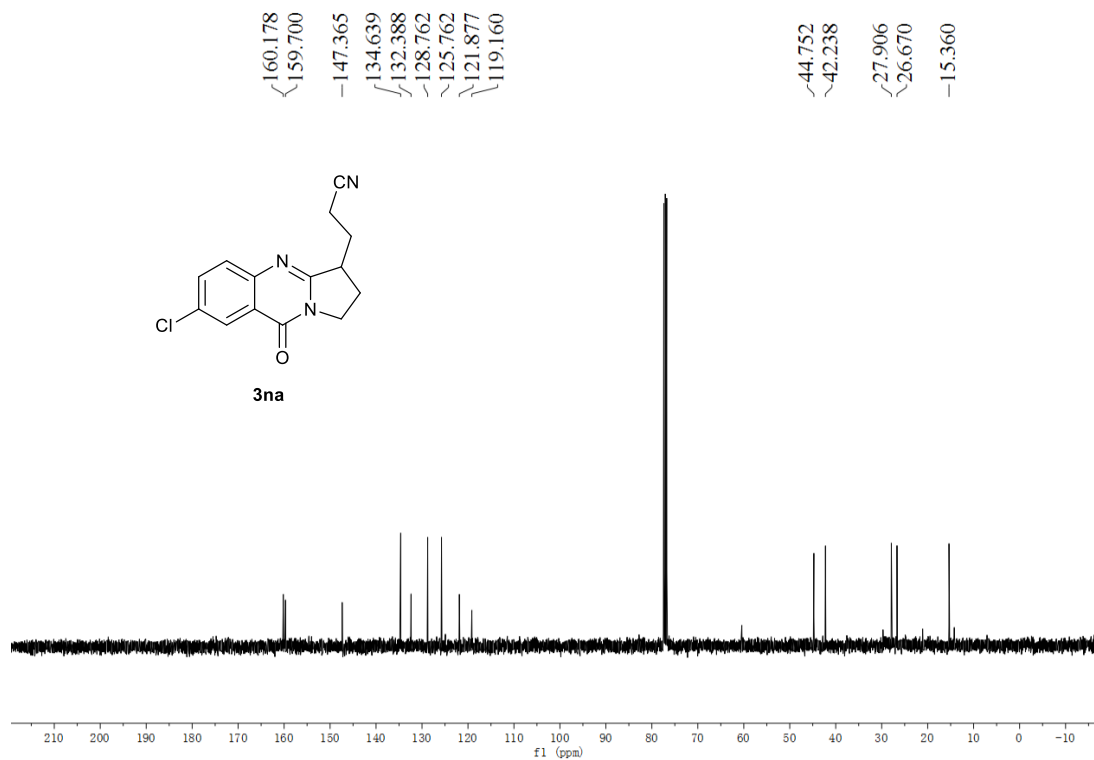

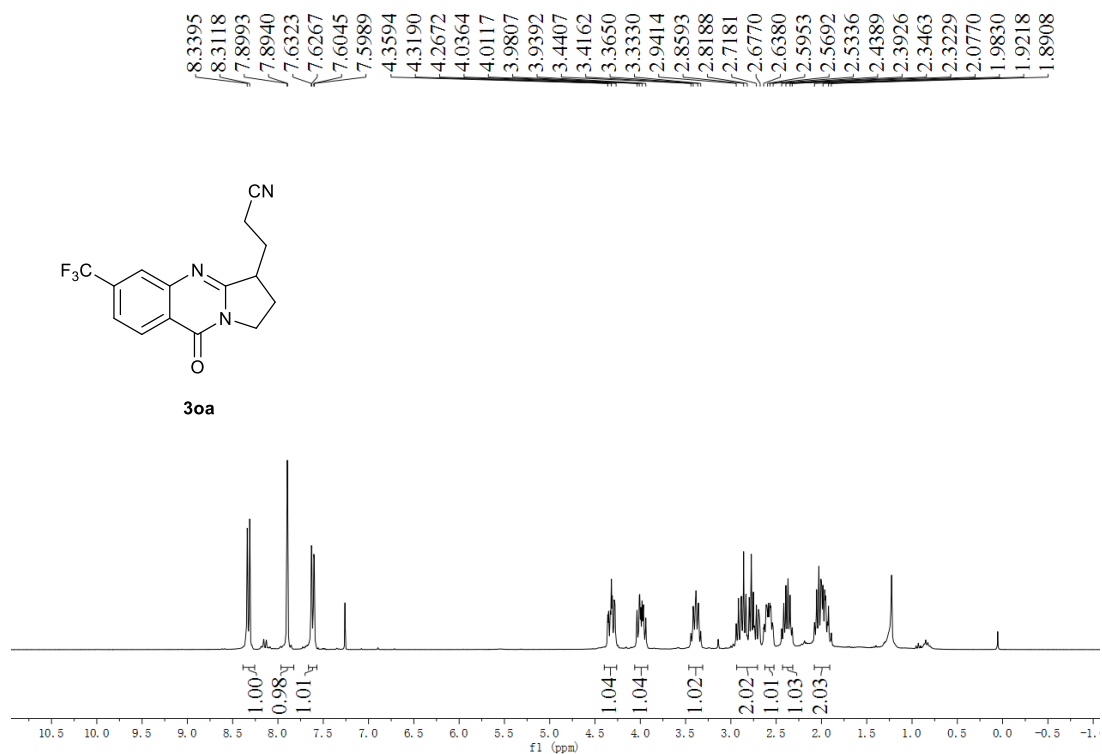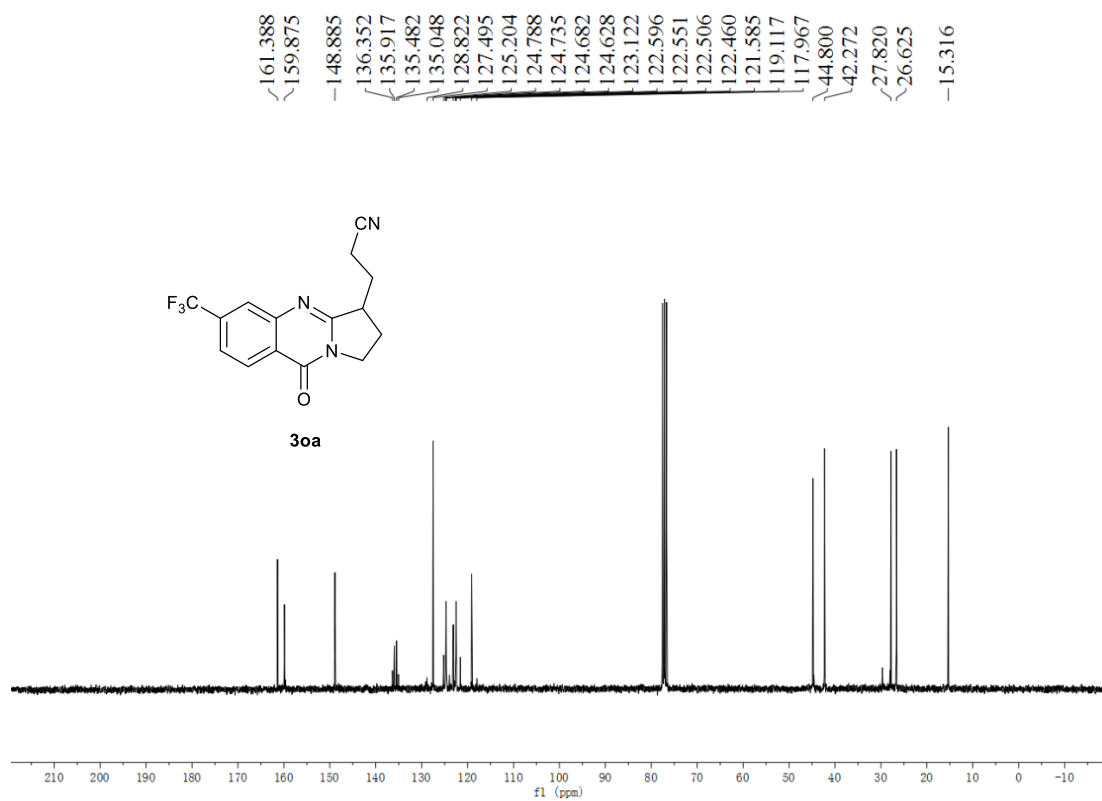

8.2605  
8.2565  
8.2519  
8.2408  
8.2366  
8.2318  
7.7340  
7.6887  
7.6643  
7.6438  
7.4548  
7.4376  
7.4103  
4.2126  
4.1696  
4.1487  
4.1011  
4.0707  
4.0510  
4.0324  
2.7002  
2.6632  
2.6589  
2.6199  
2.5709  
2.5303  
2.5122  
2.4890  
2.2425  
2.2107  
2.1375  
2.0931  
2.0812  
1.4209

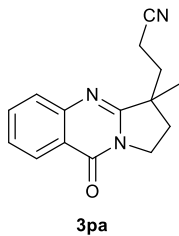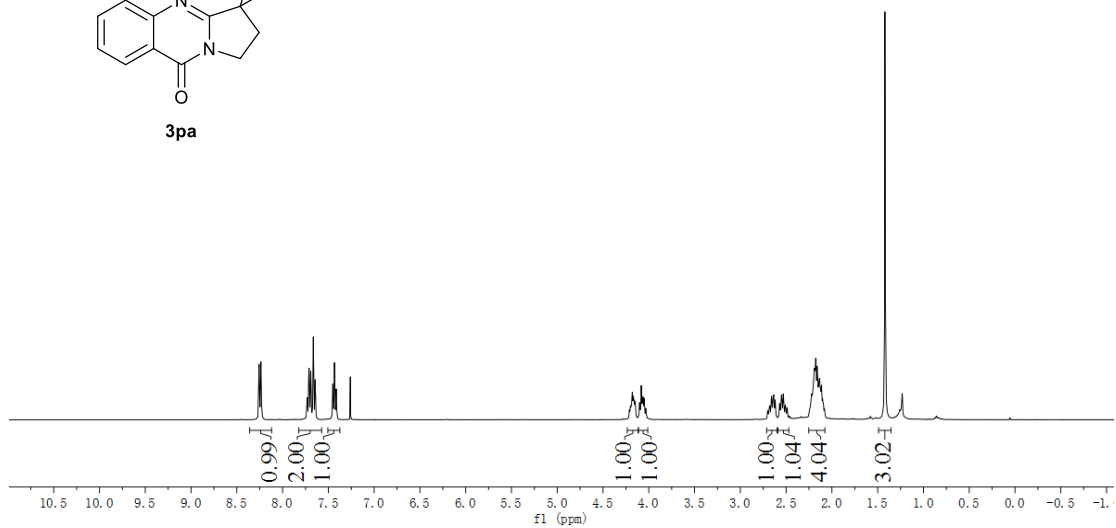

162.31  
160.87  
-149.02  
134.25  
127.25  
126.58  
126.37  
120.83  
119.61  
45.85  
43.10  
33.95  
33.17  
23.58  
12.72

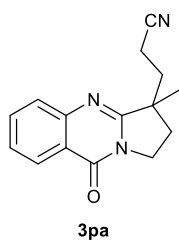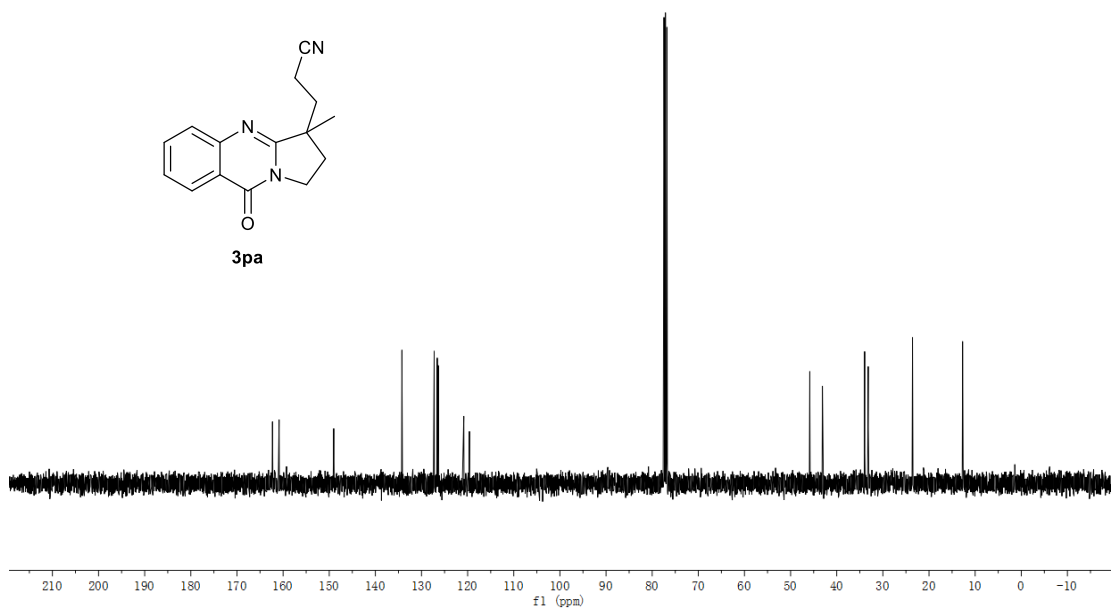

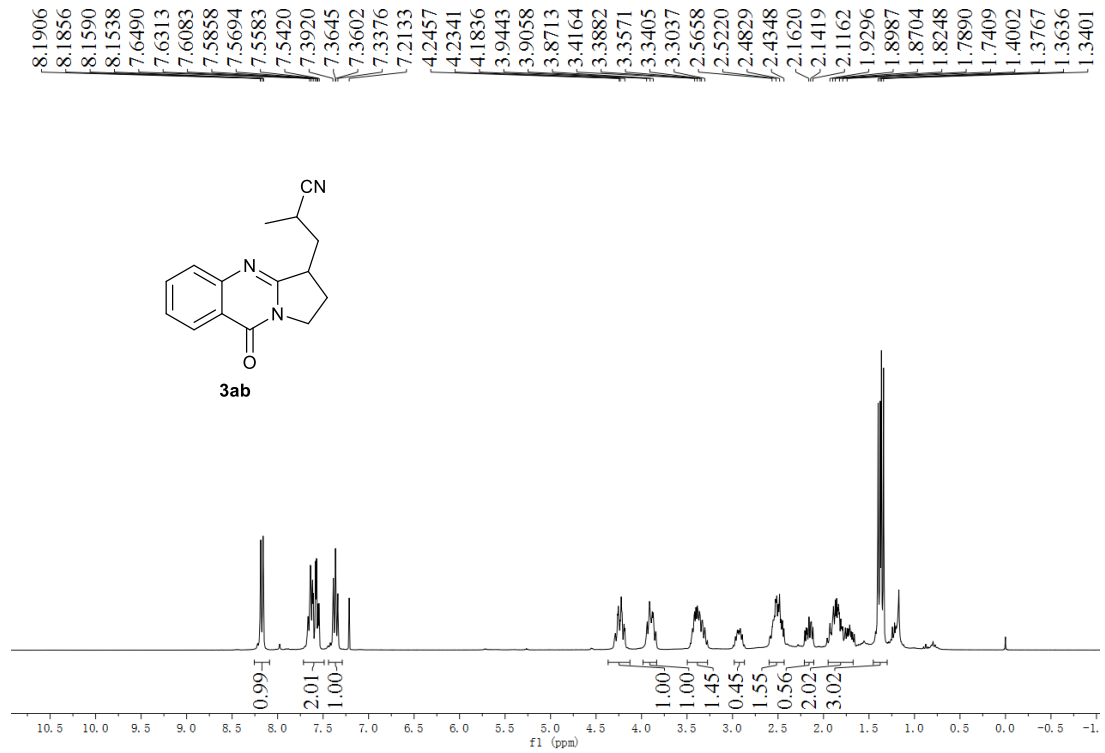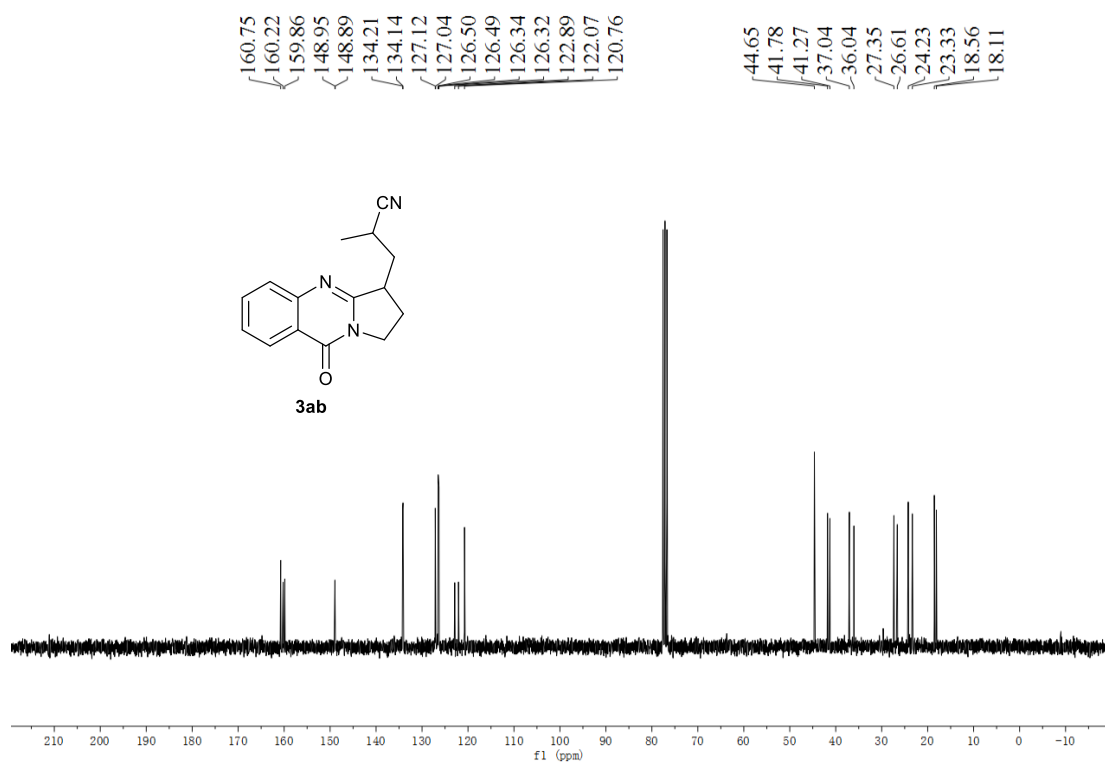

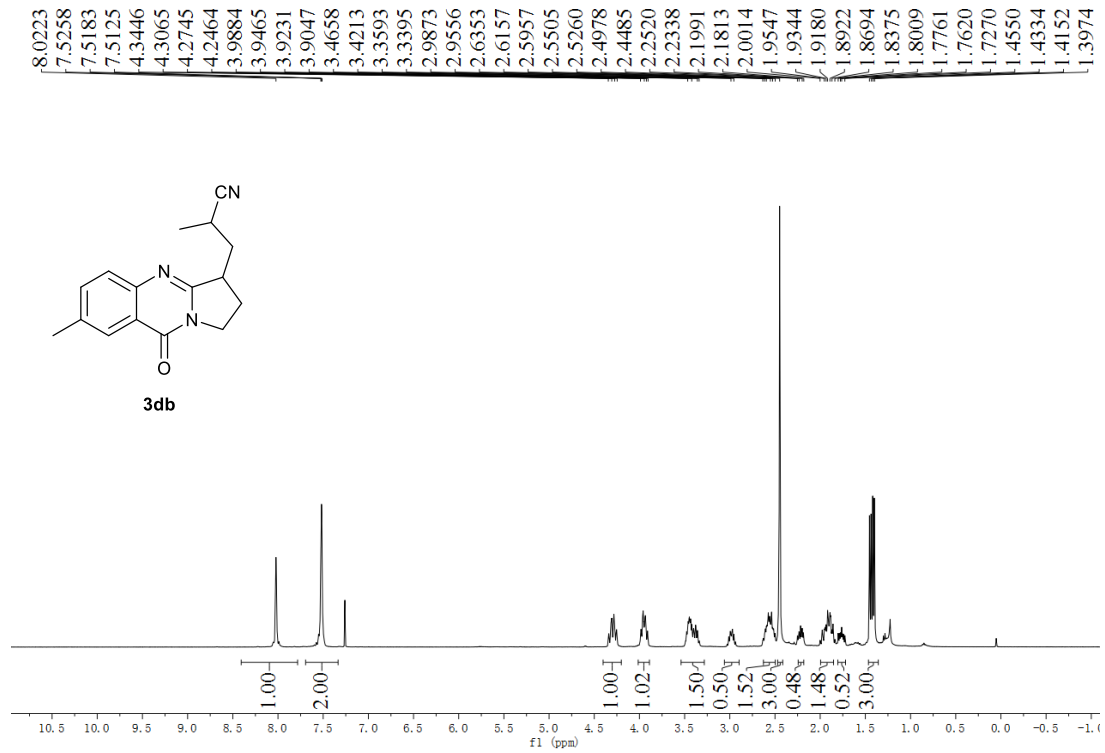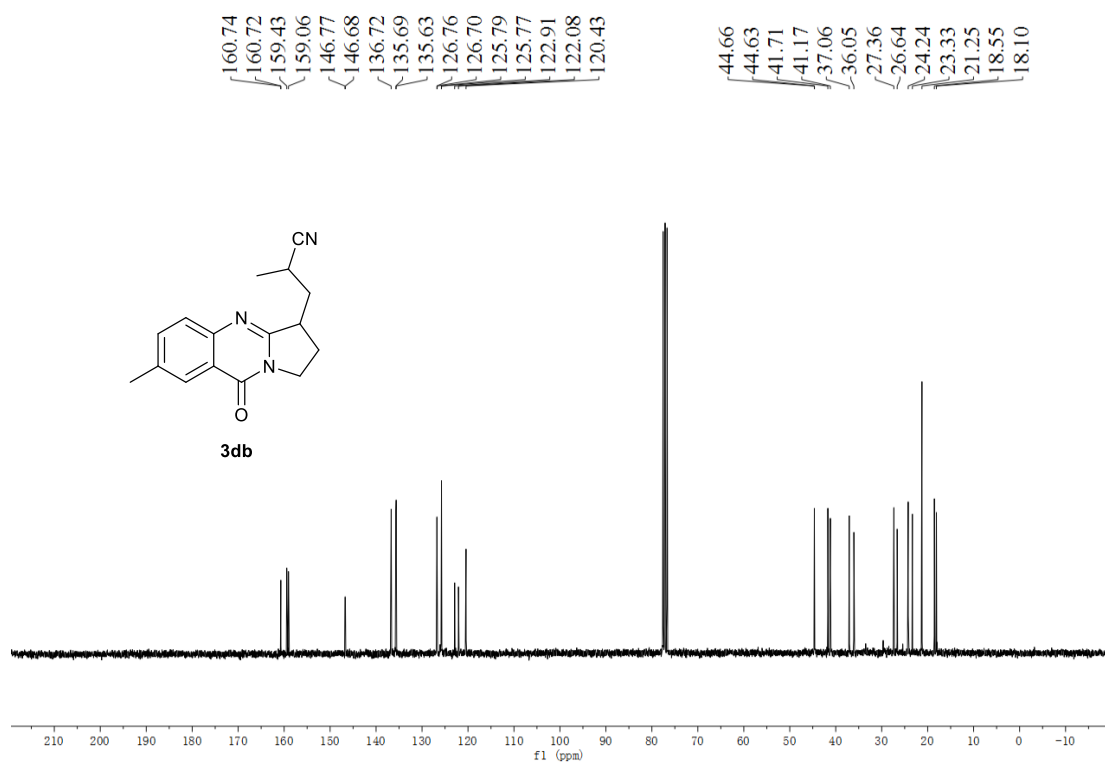

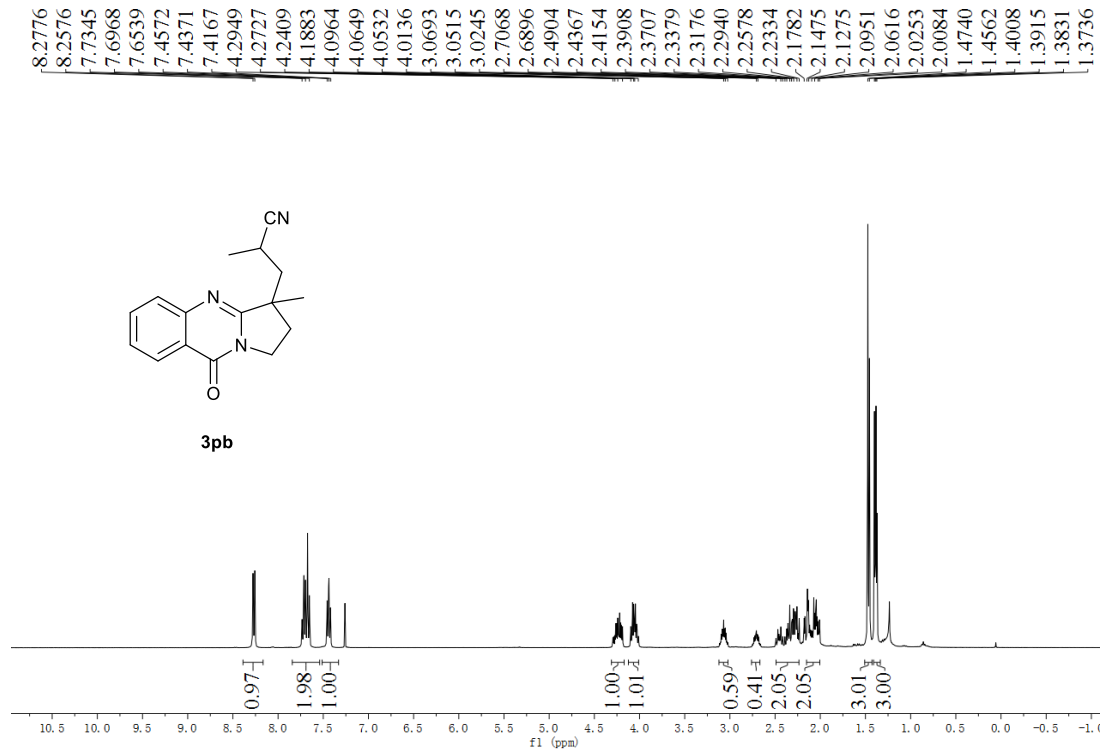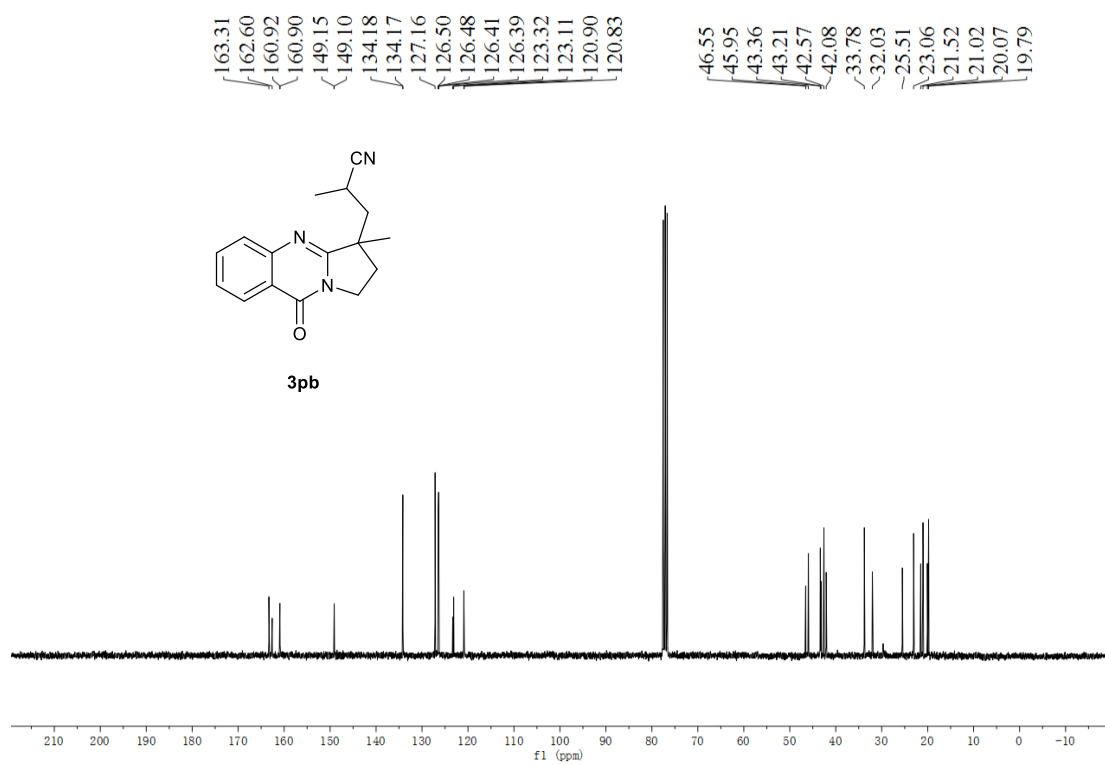

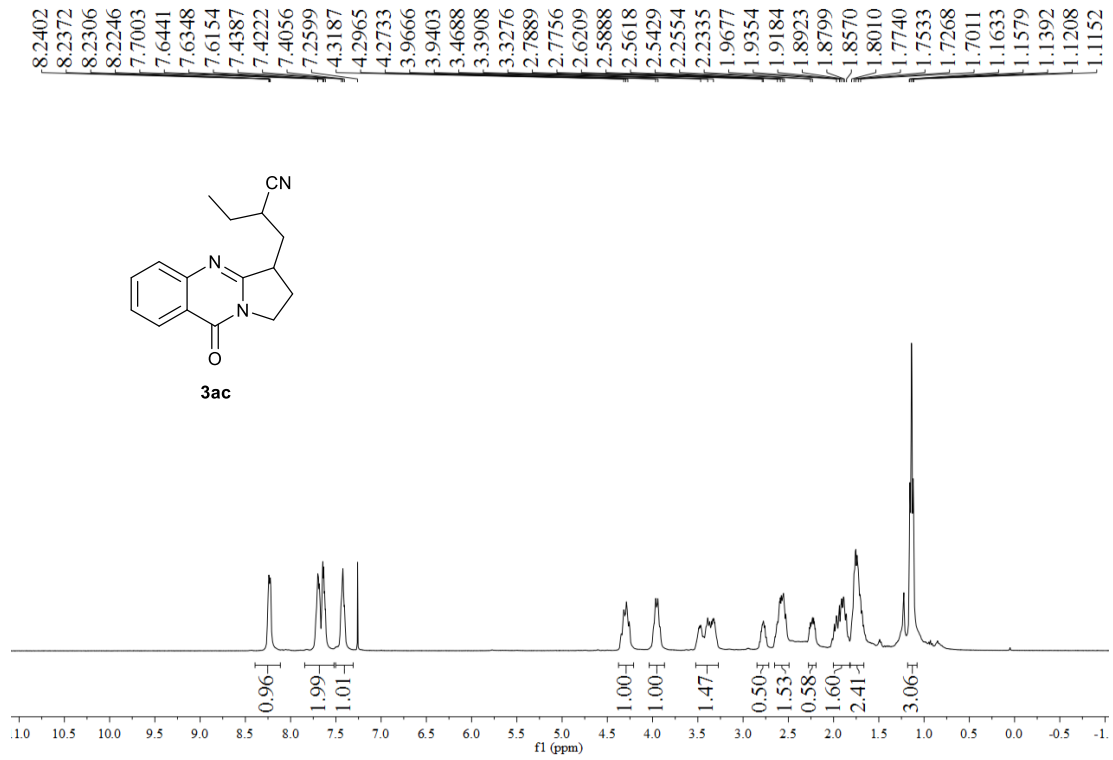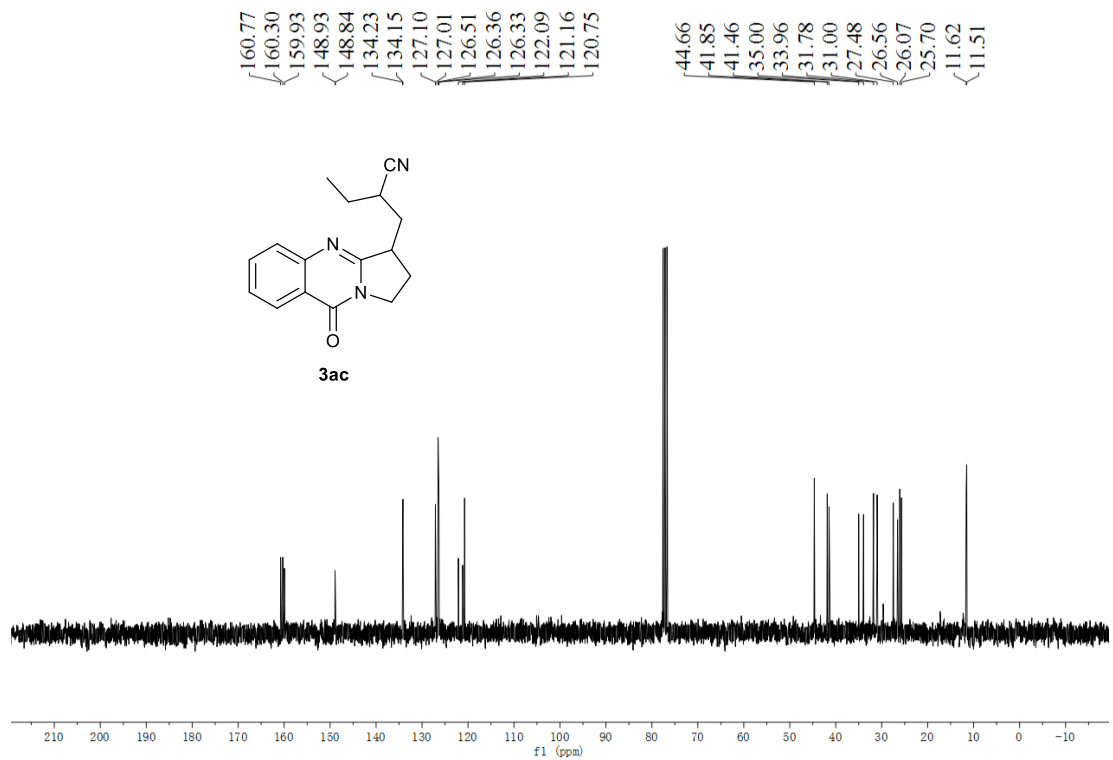

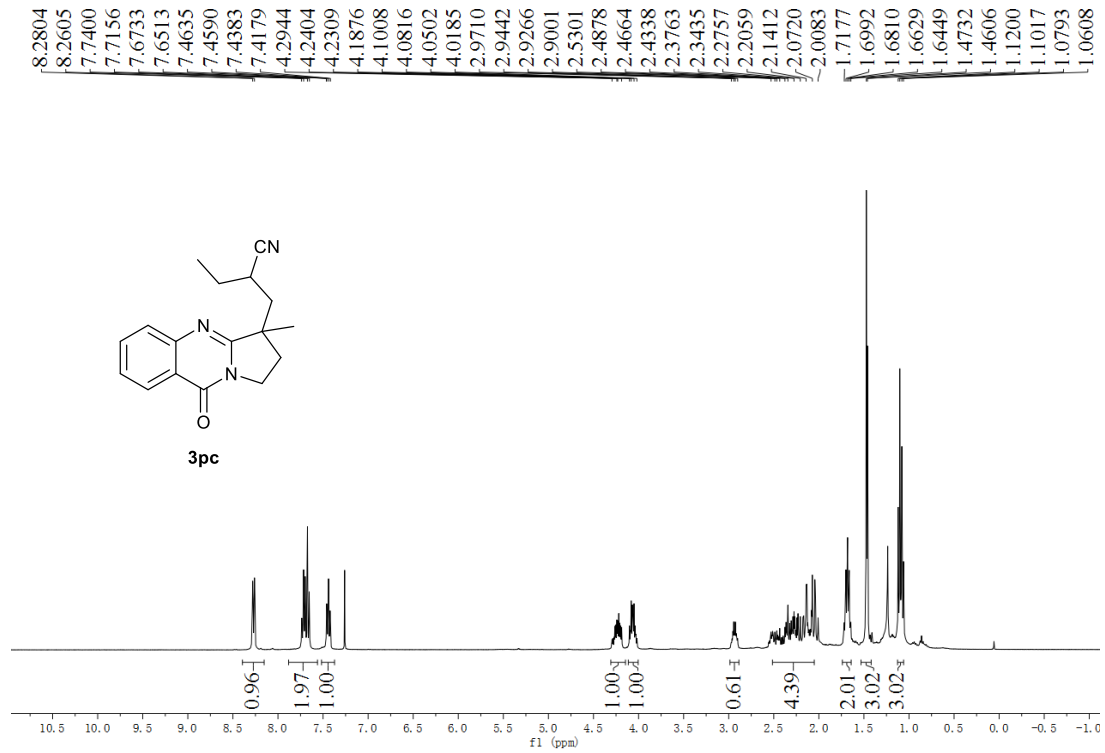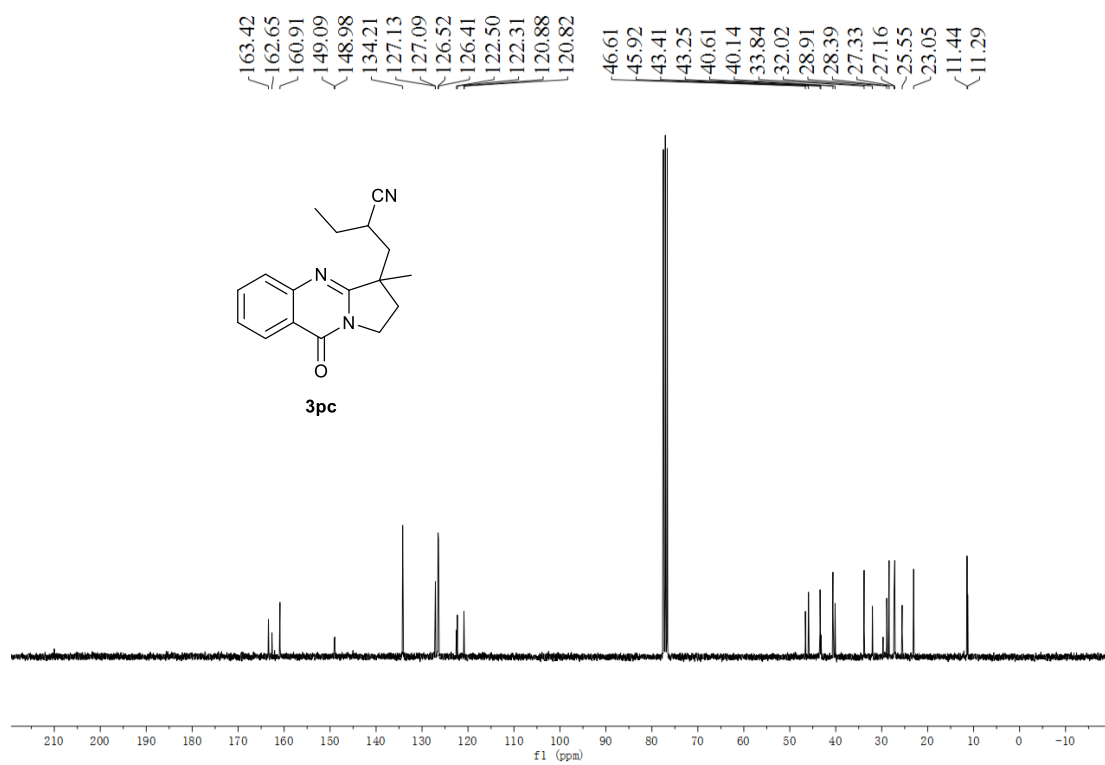



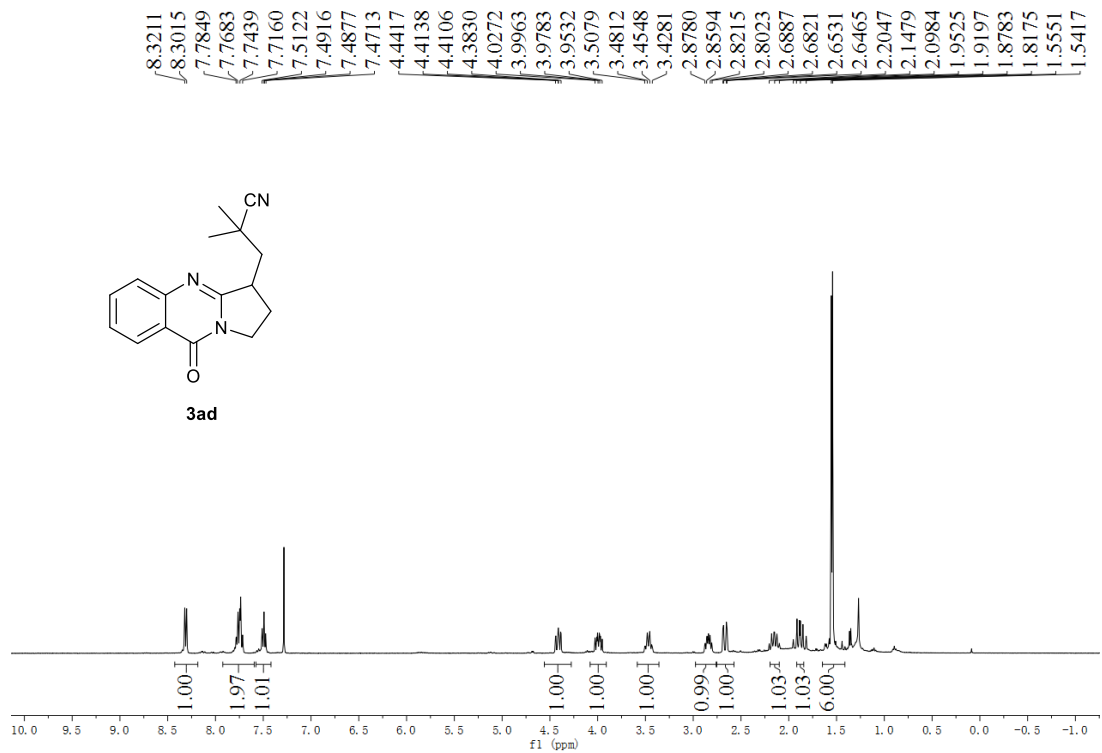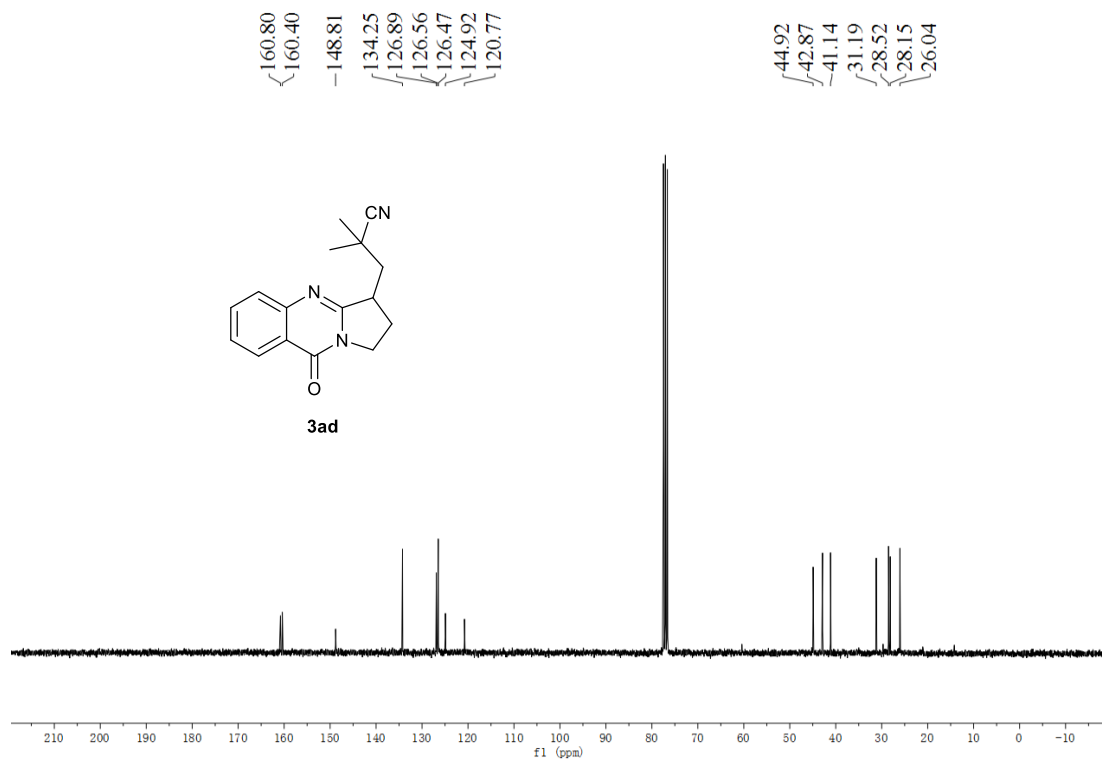

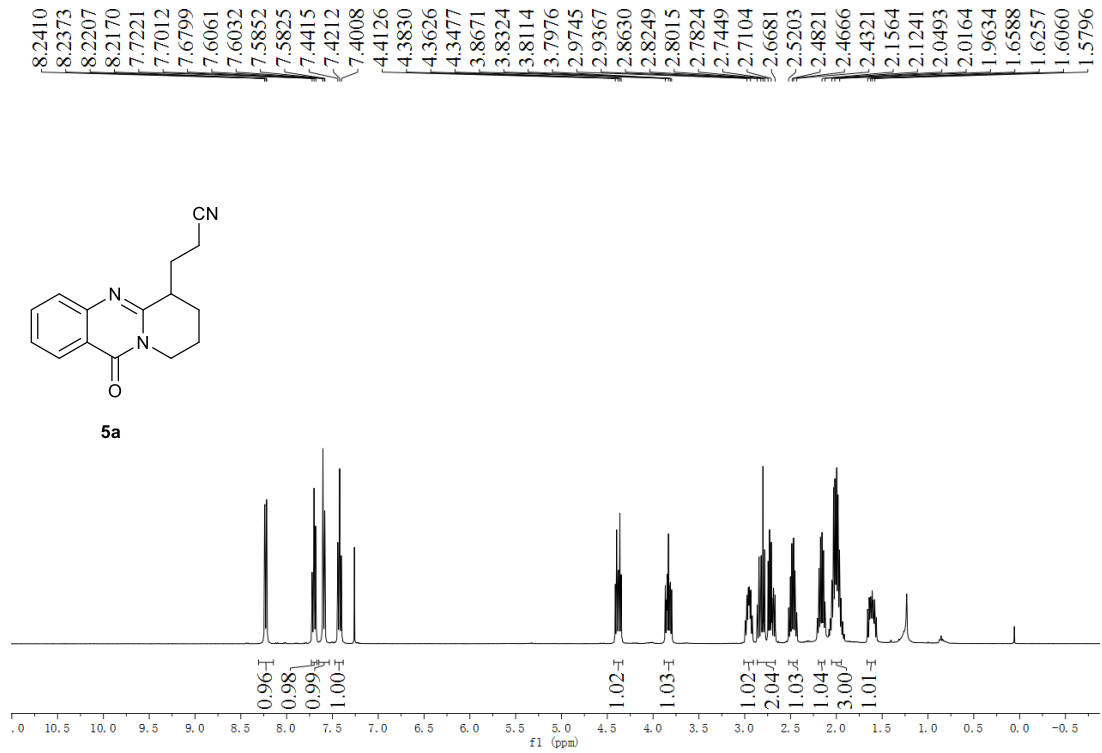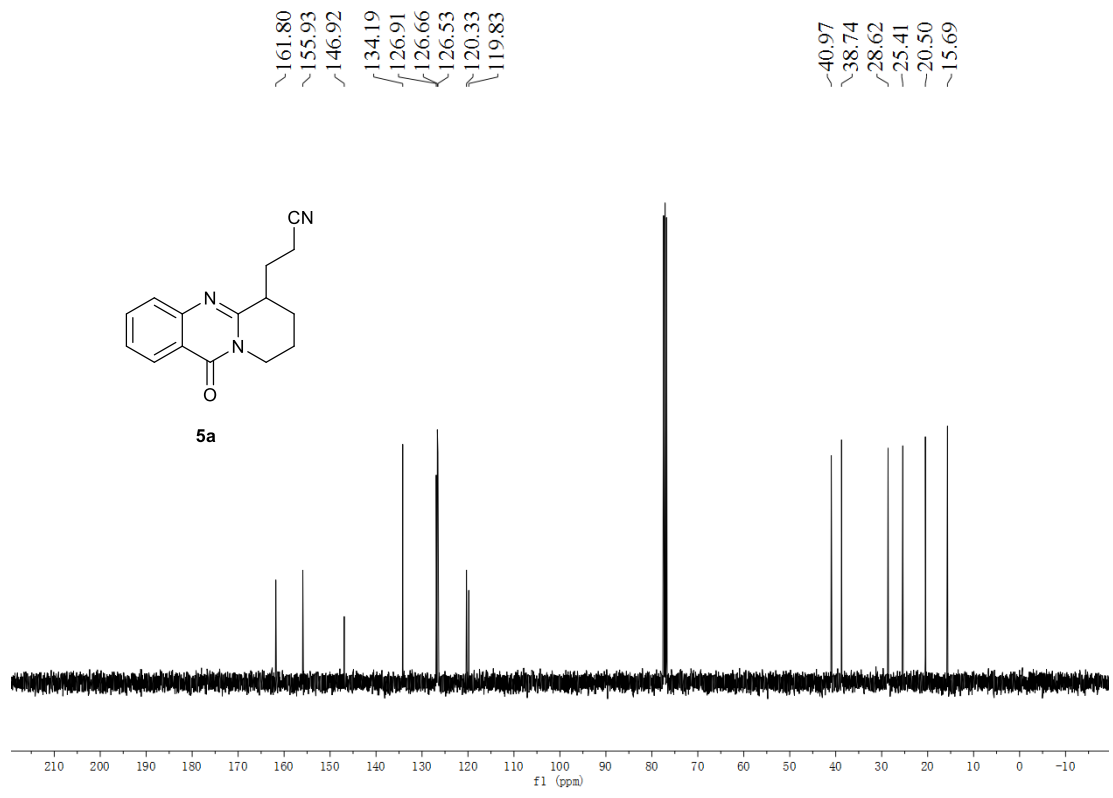

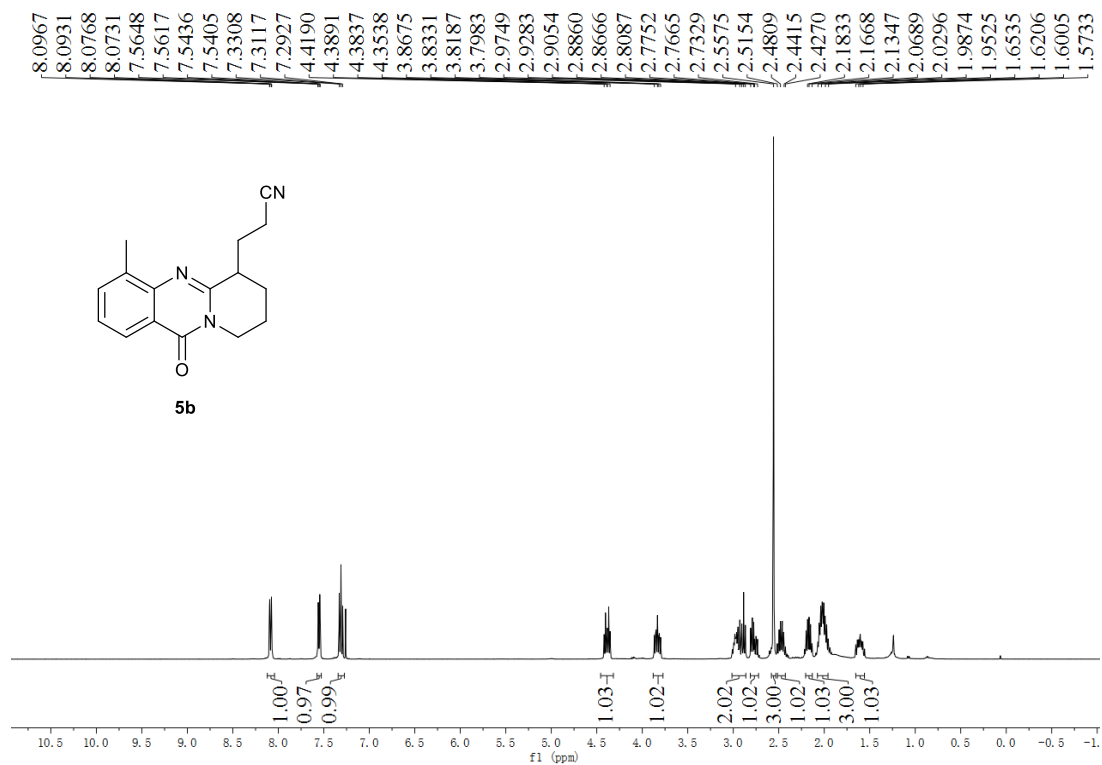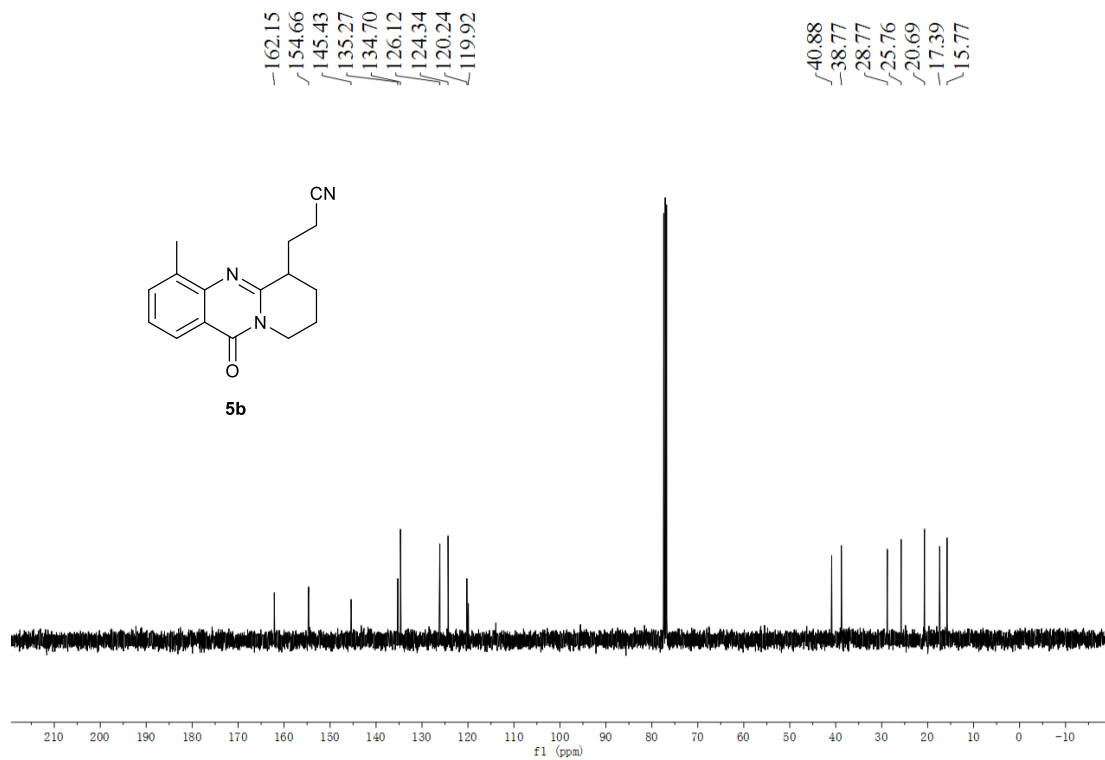

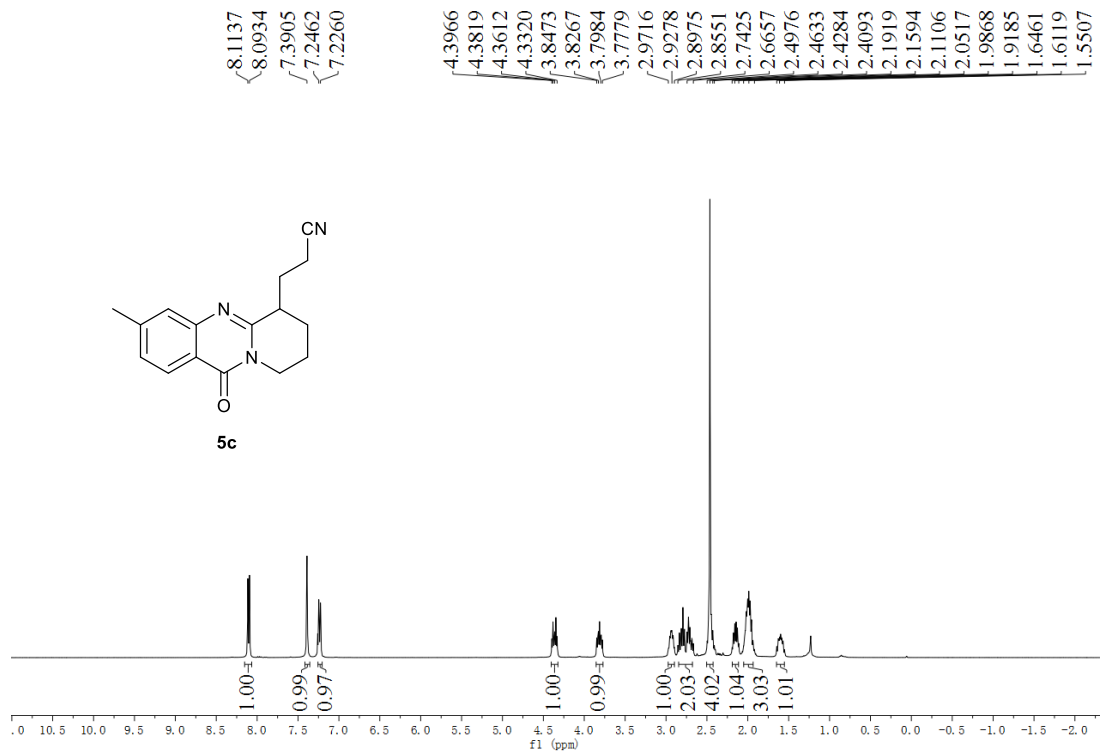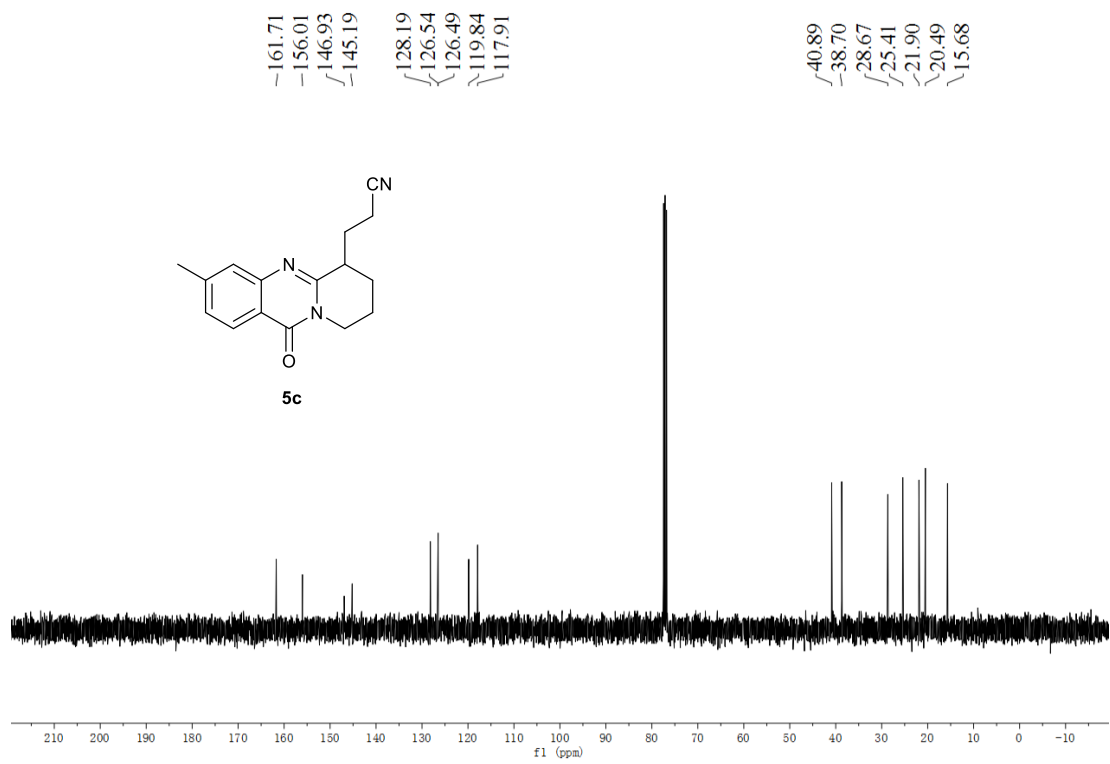

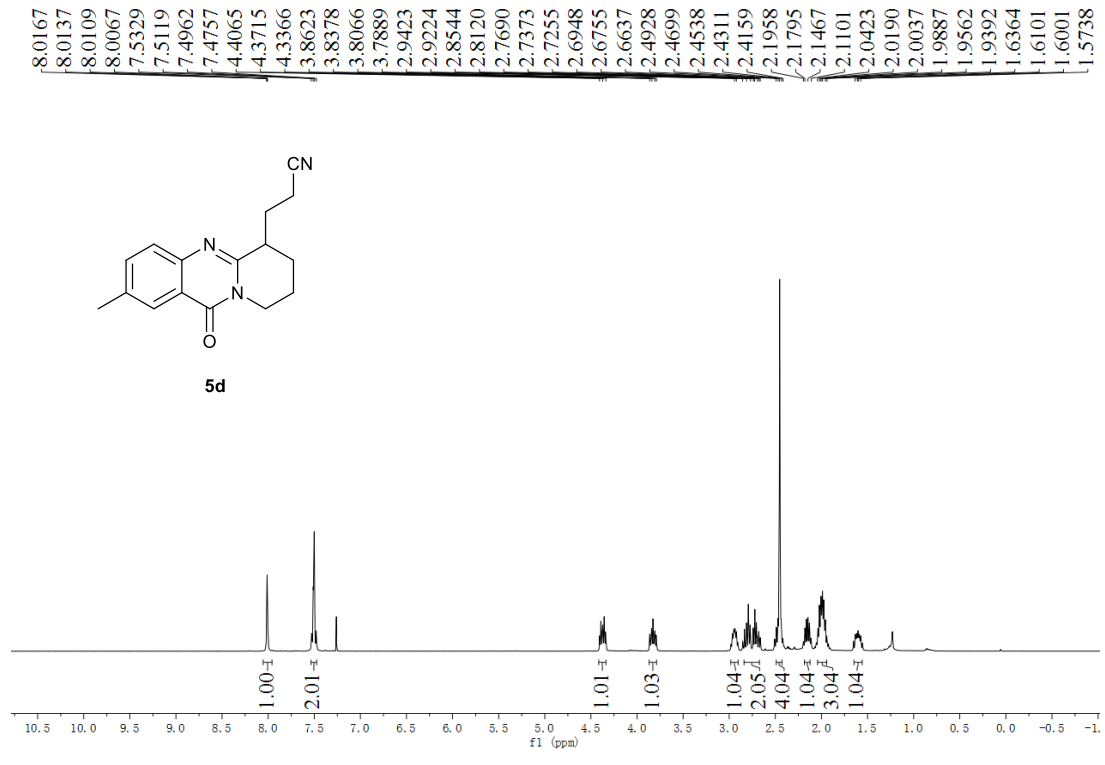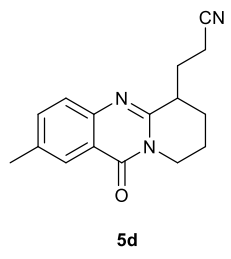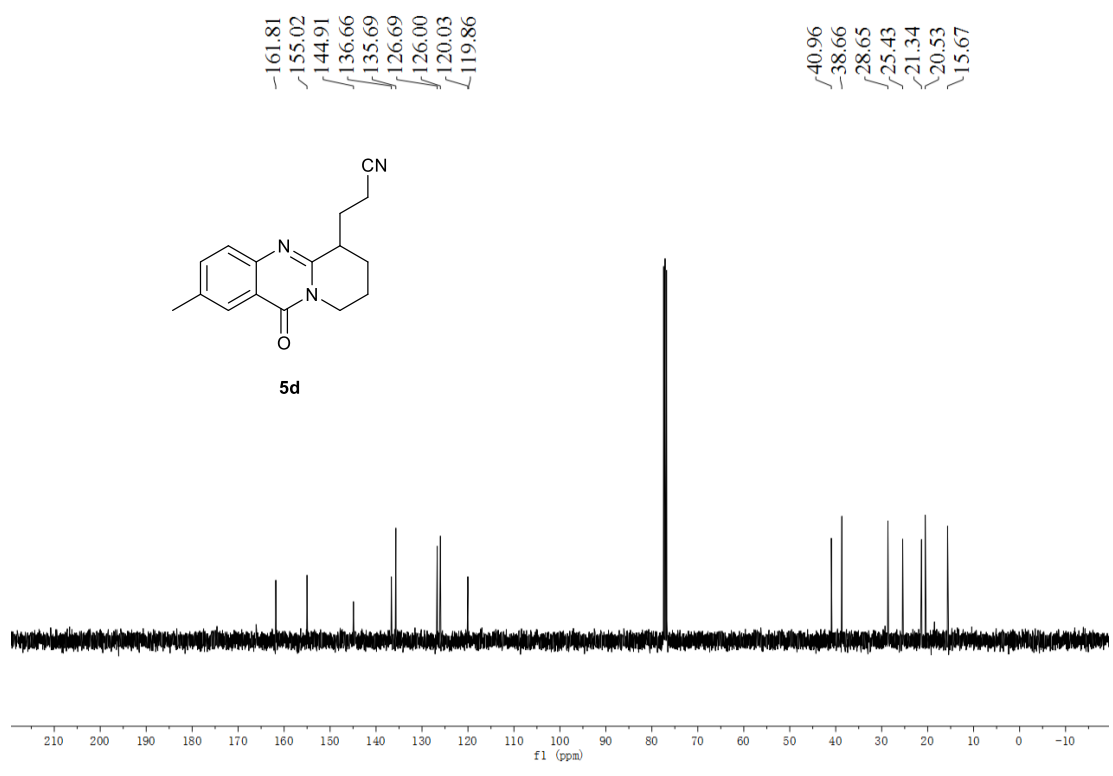

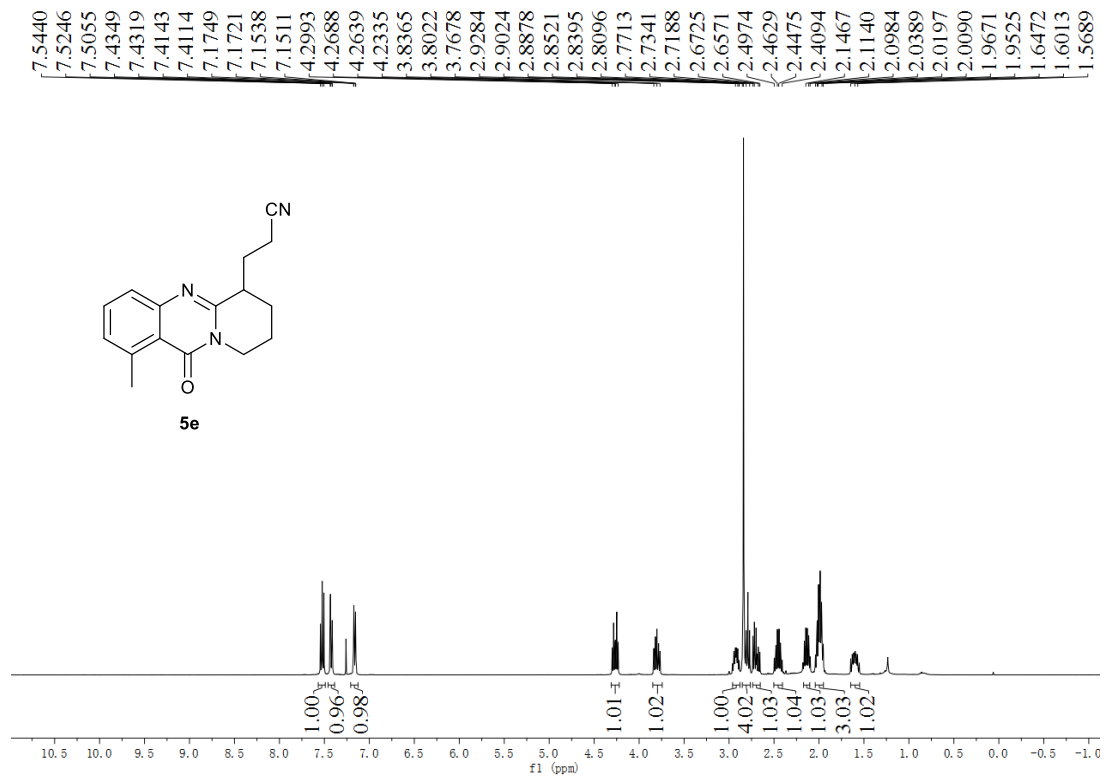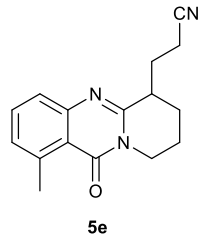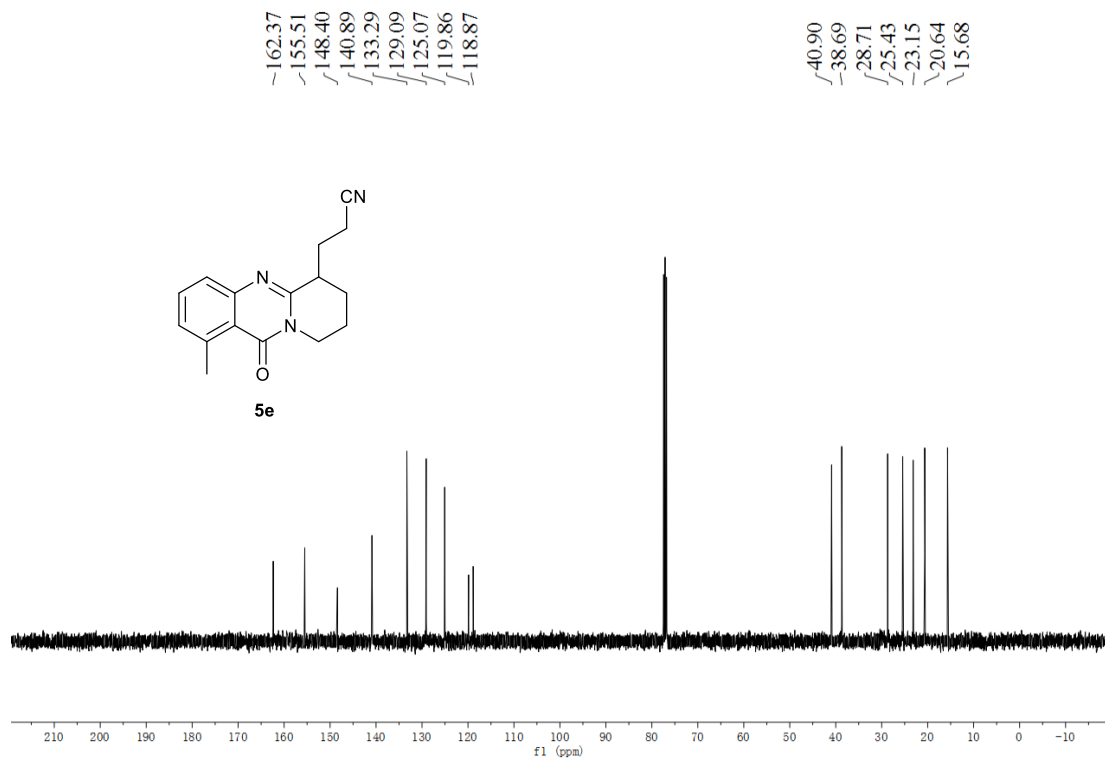

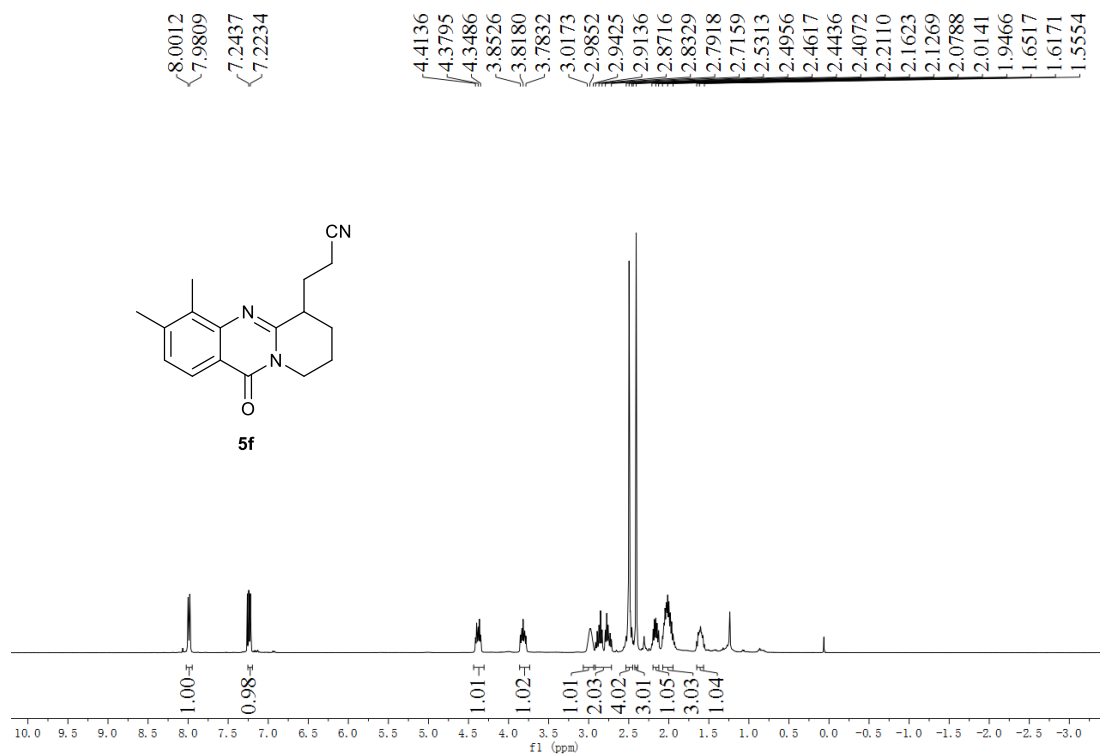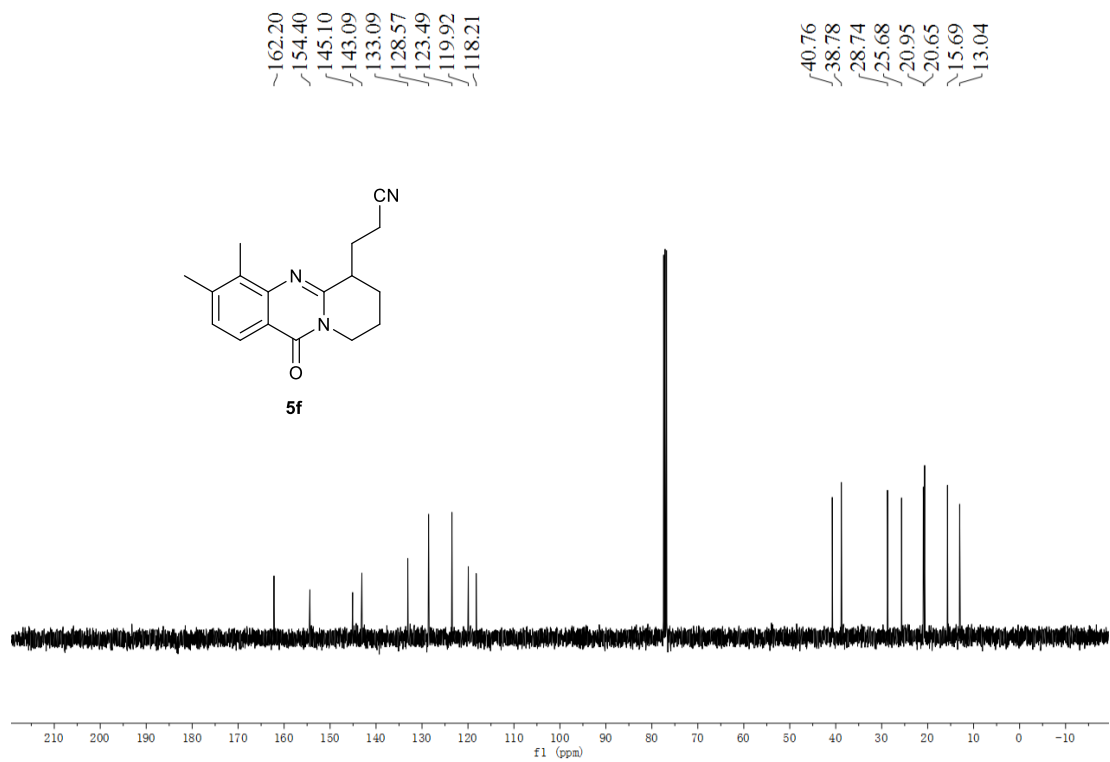

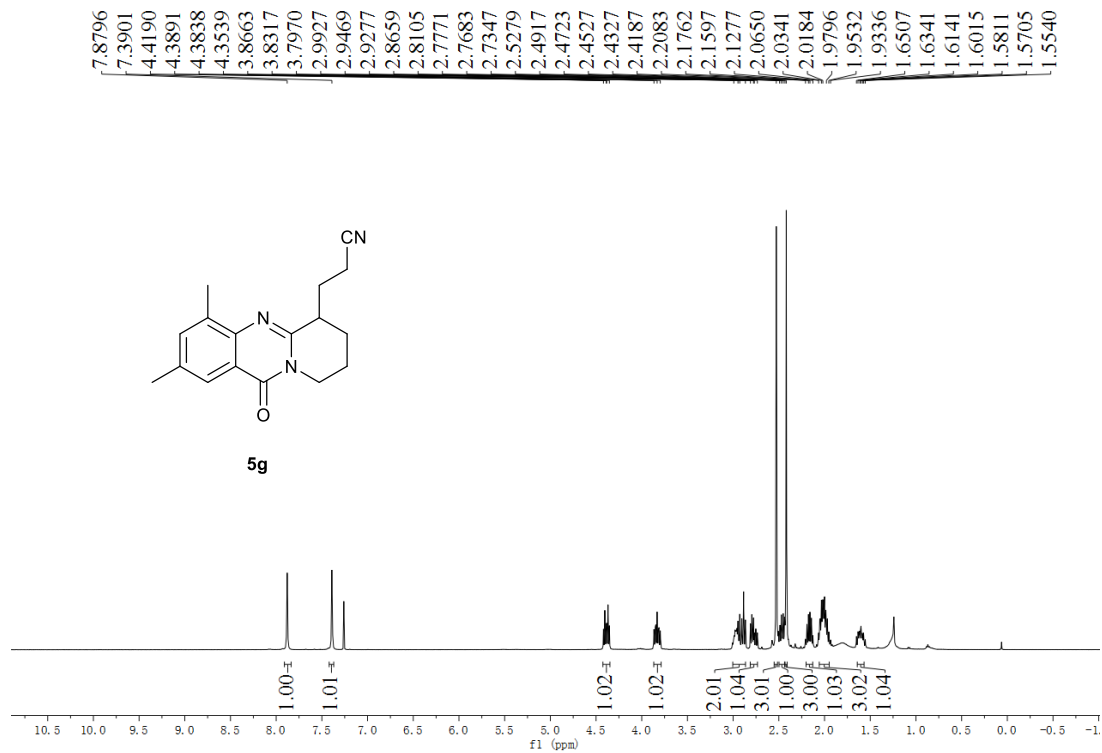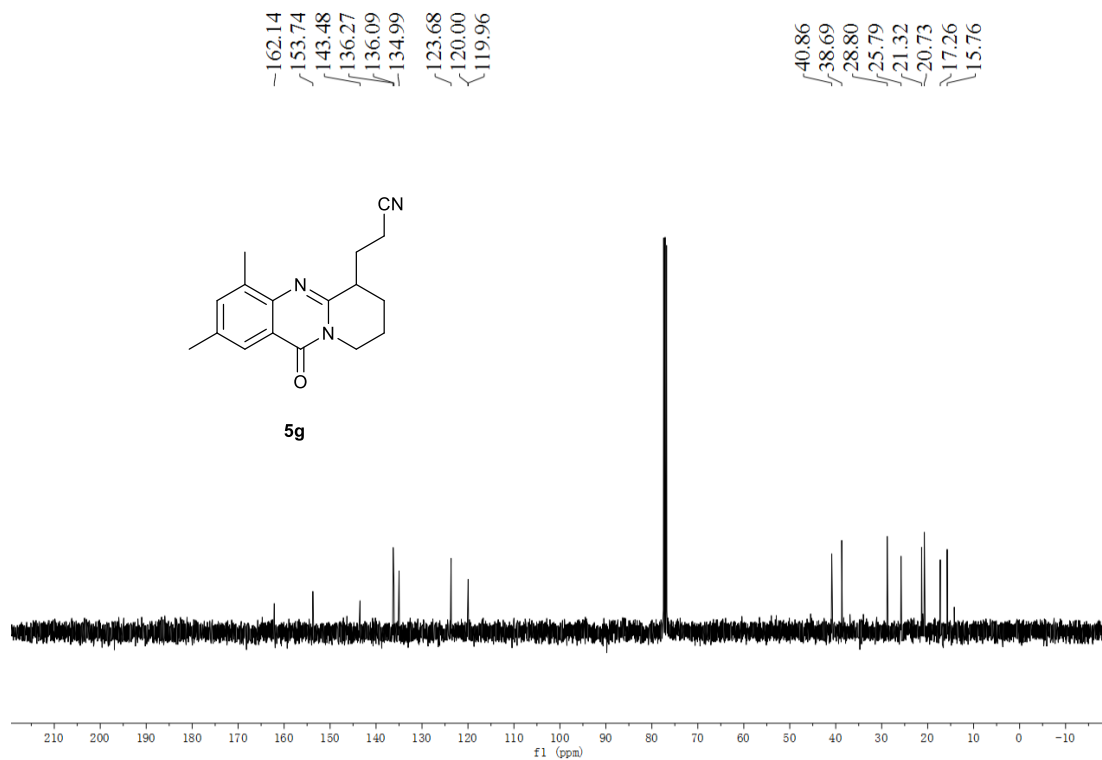



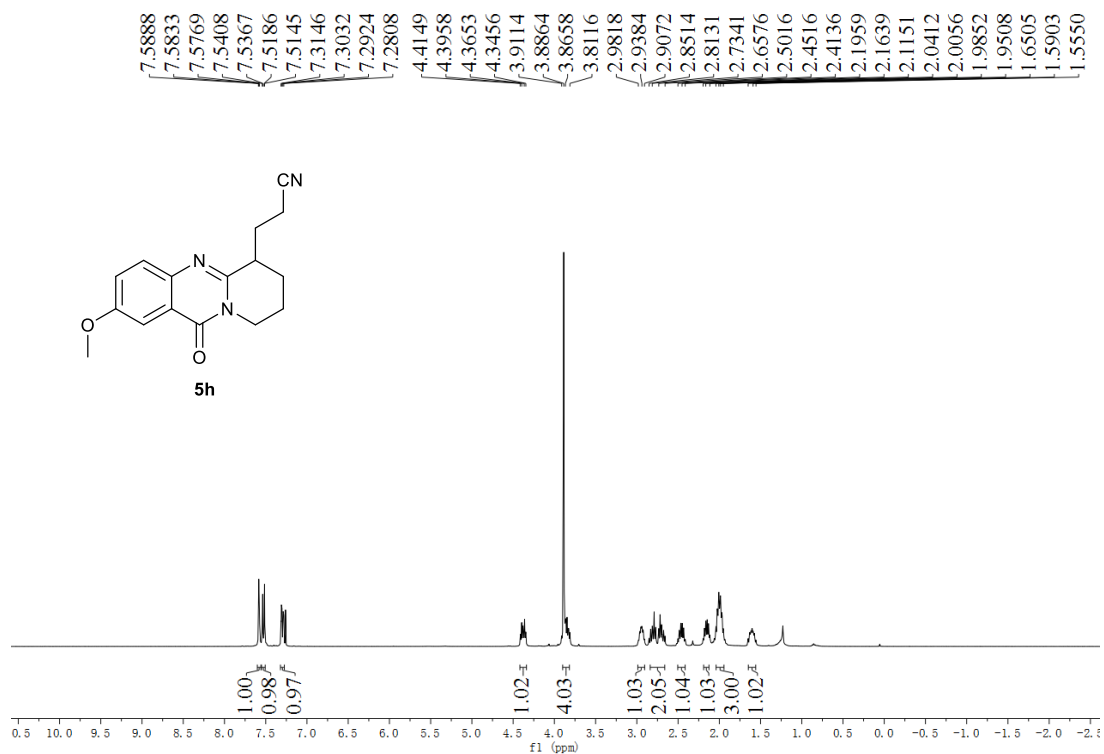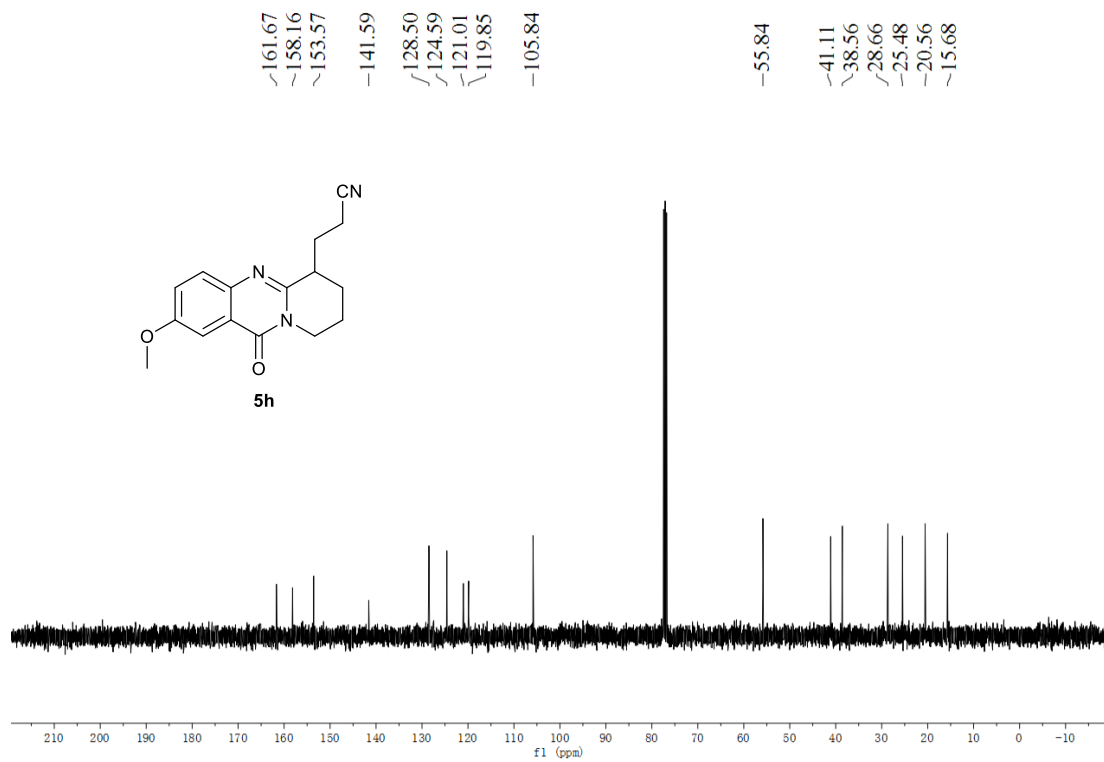

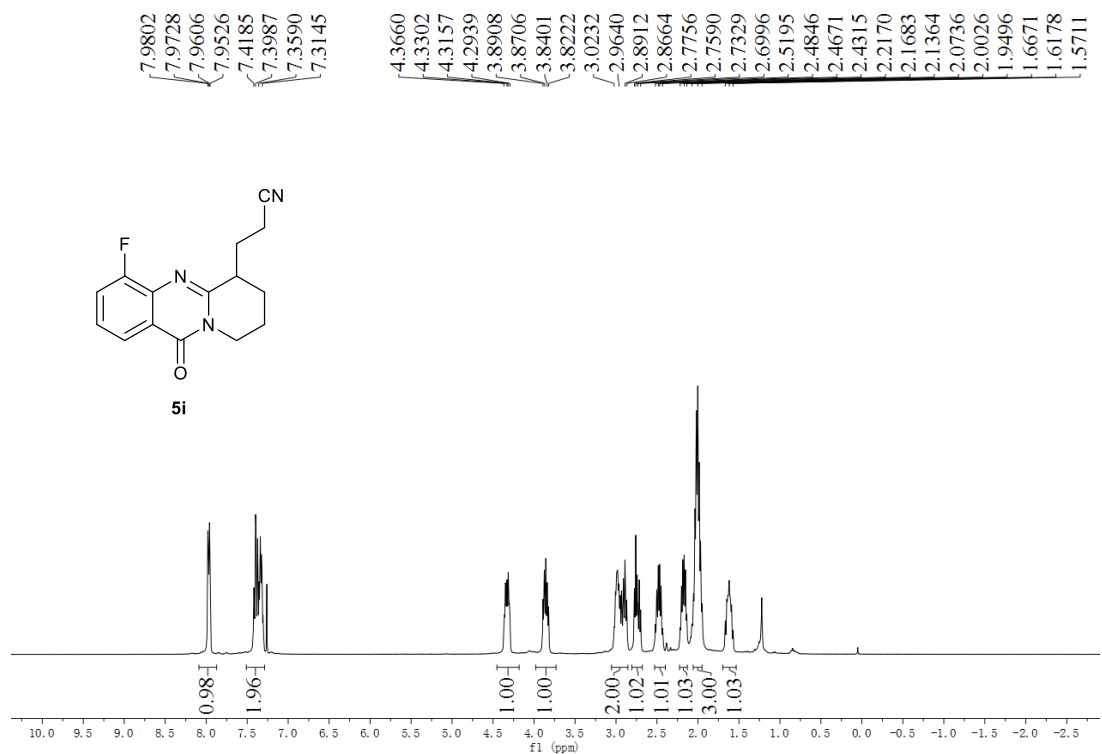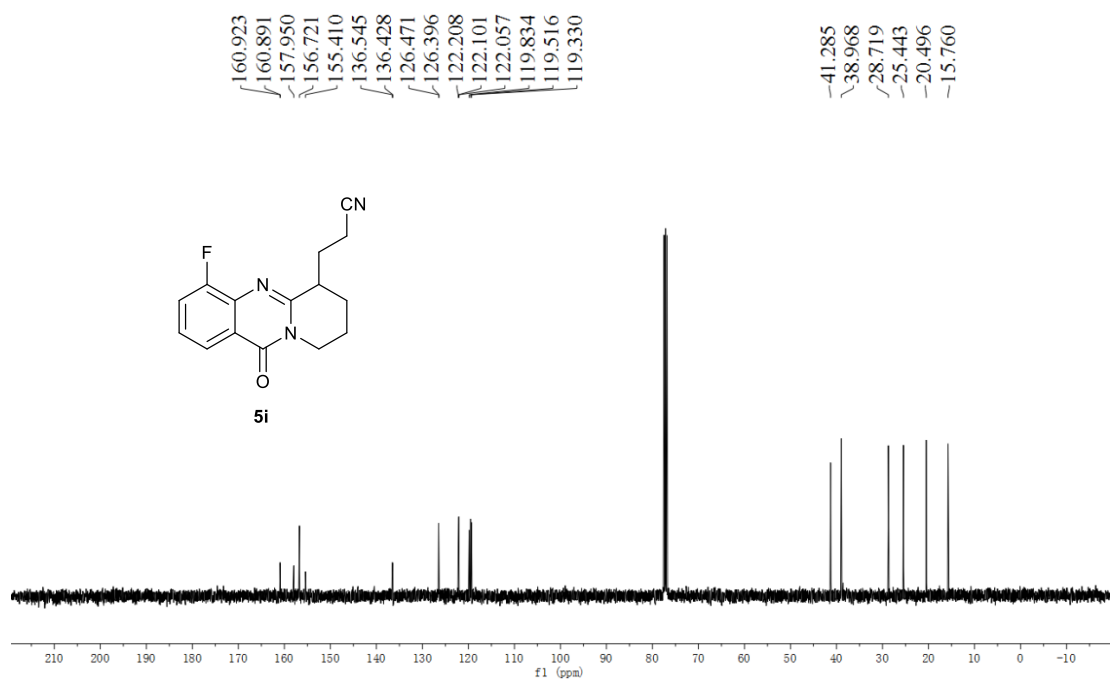

8.2115  
8.1912  
8.1820  
8.1616  
7.2117  
7.2010  
7.1796  
7.1714  
7.1198  
7.1115  
7.0627  
7.0544  
4.3593  
4.3201  
4.3122  
4.2730  
3.8222  
3.7760  
3.7297  
2.9617  
2.9199  
2.8212  
2.7392  
2.6308  
2.5857  
2.4774  
2.4311  
2.3608  
2.1787  
2.1355  
2.1136  
2.0563  
2.0176  
1.9437  
1.8915  
1.6283  
1.5845  
1.5021

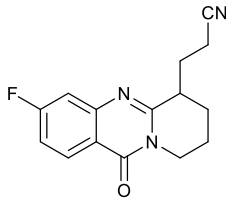

5j

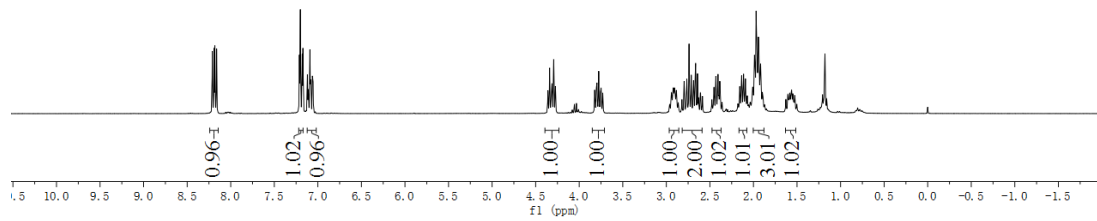

168.093  
164.726  
161.056  
157.457  
148.959  
148.784  
129.545  
129.403  
119.657  
117.040  
117.014  
115.622  
115.309  
112.156  
111.869  
41.031  
38.757  
28.533  
25.260  
20.400  
15.695

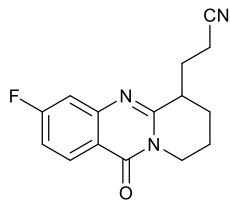

5j

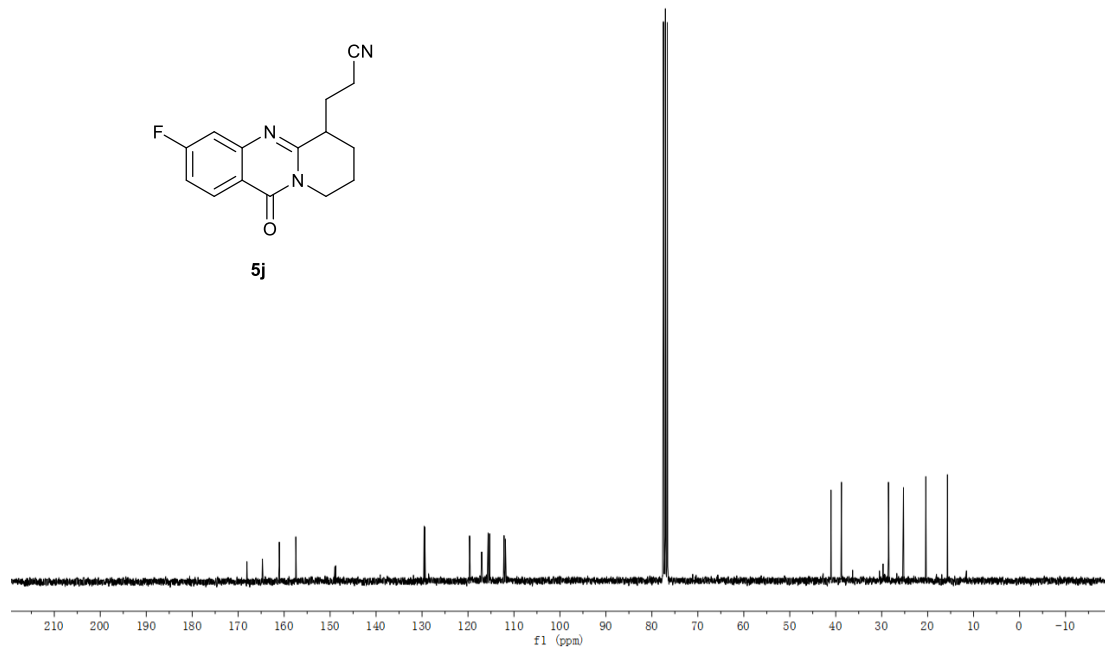

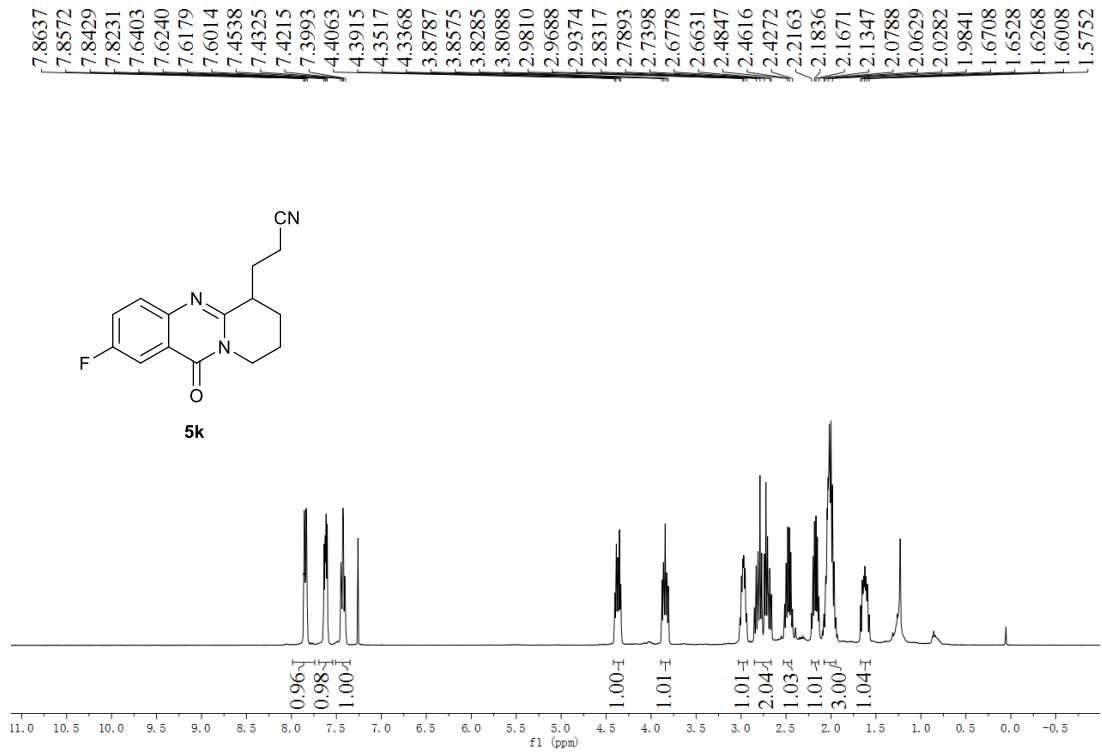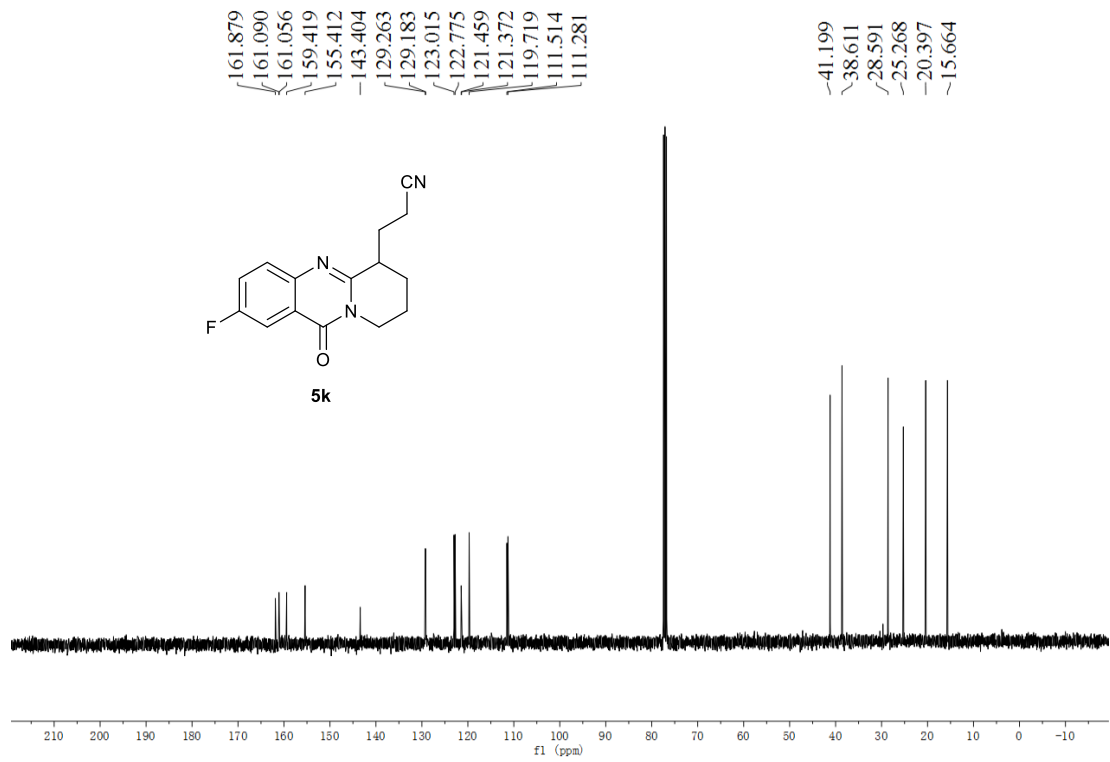

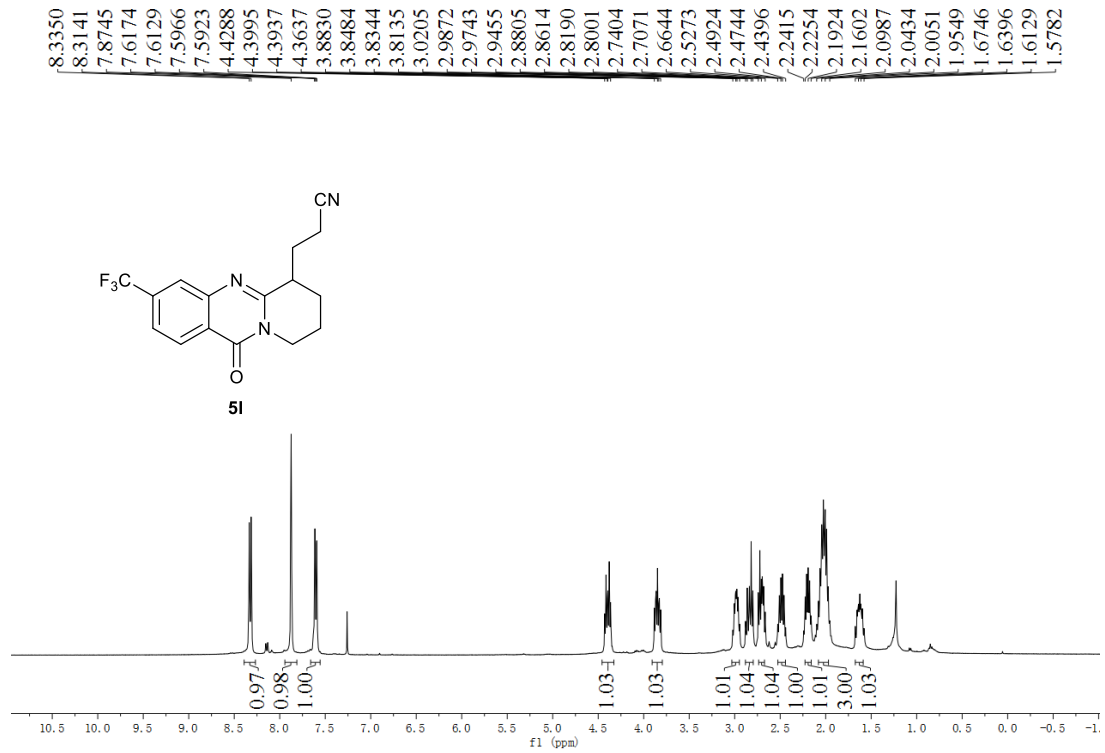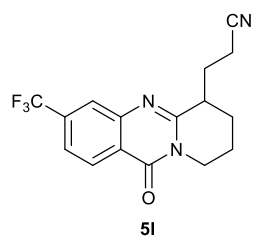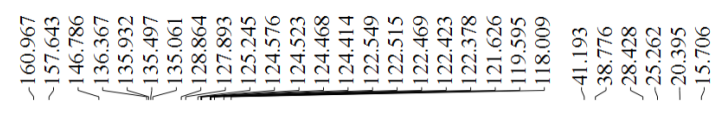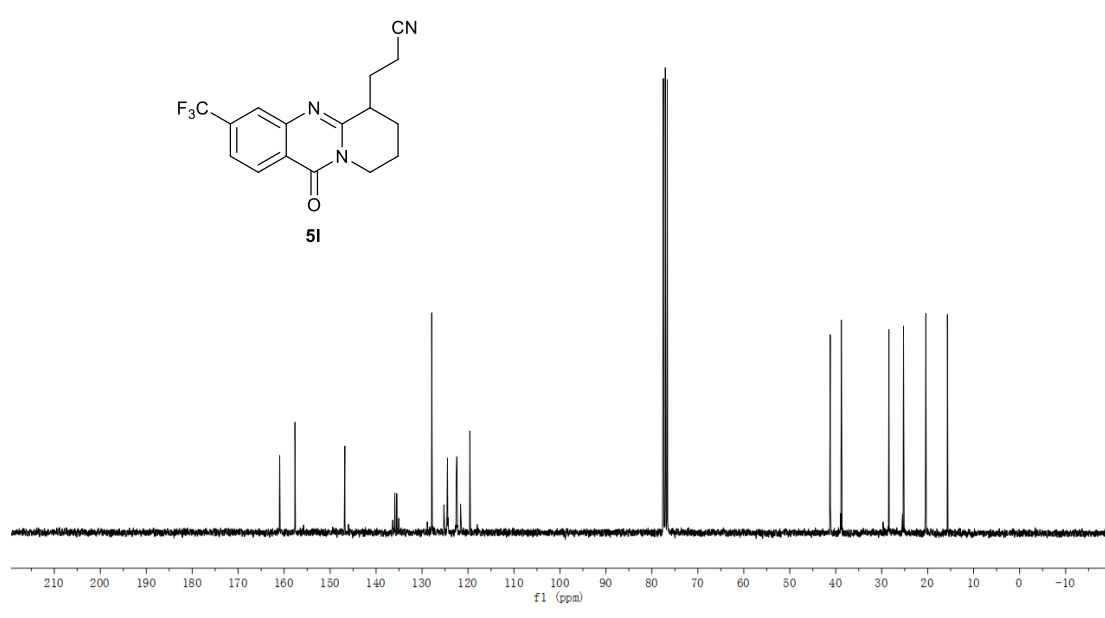

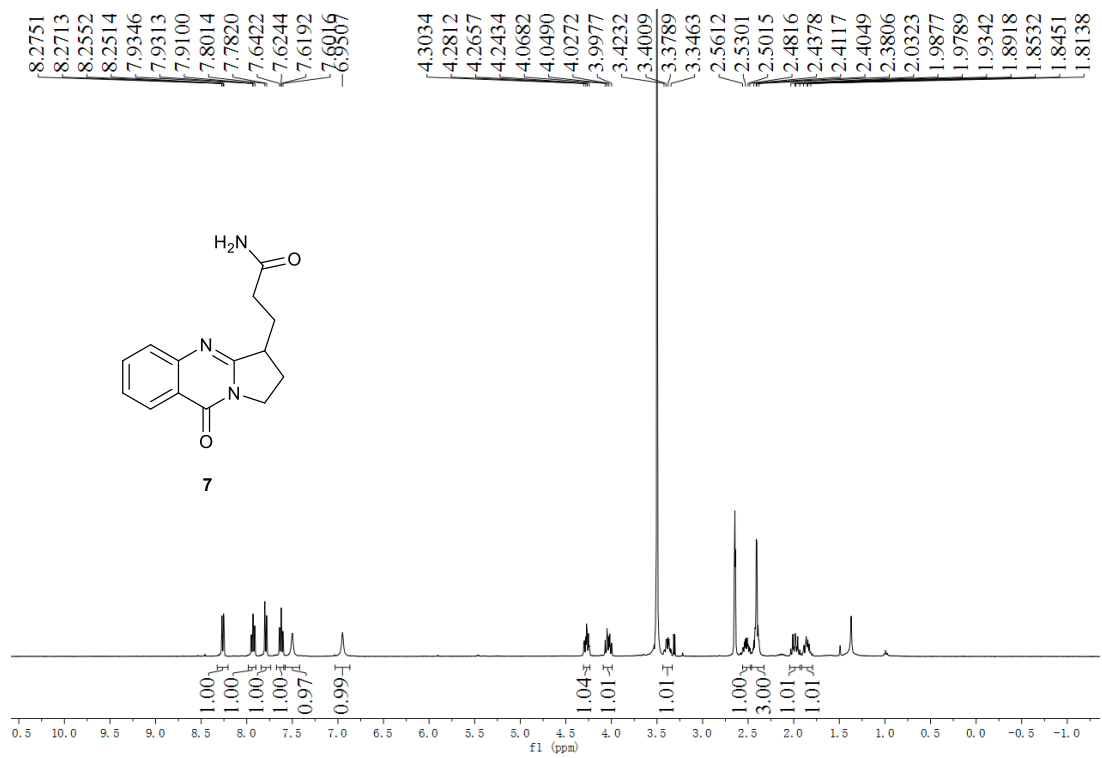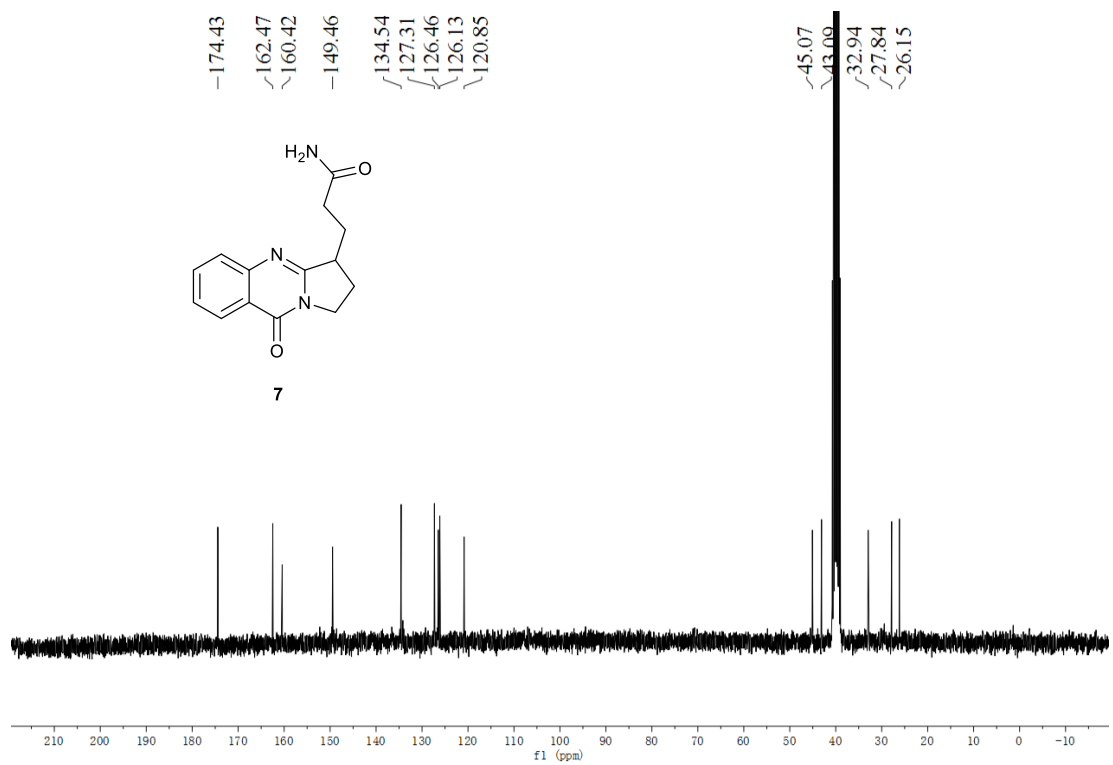

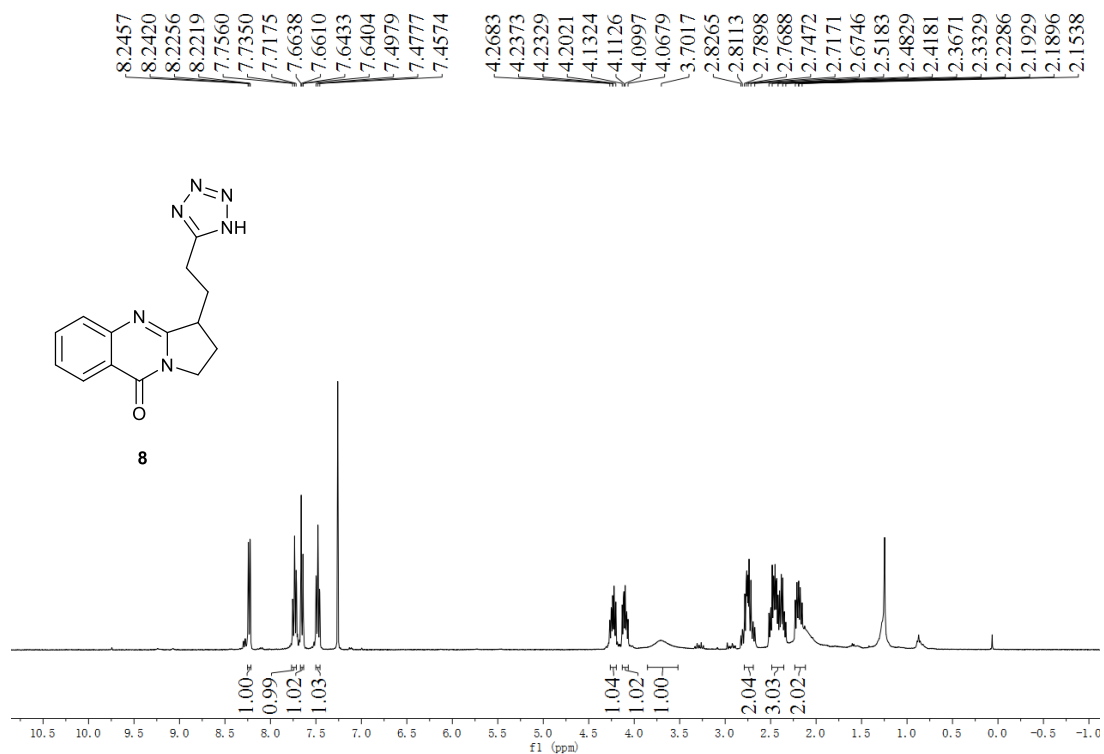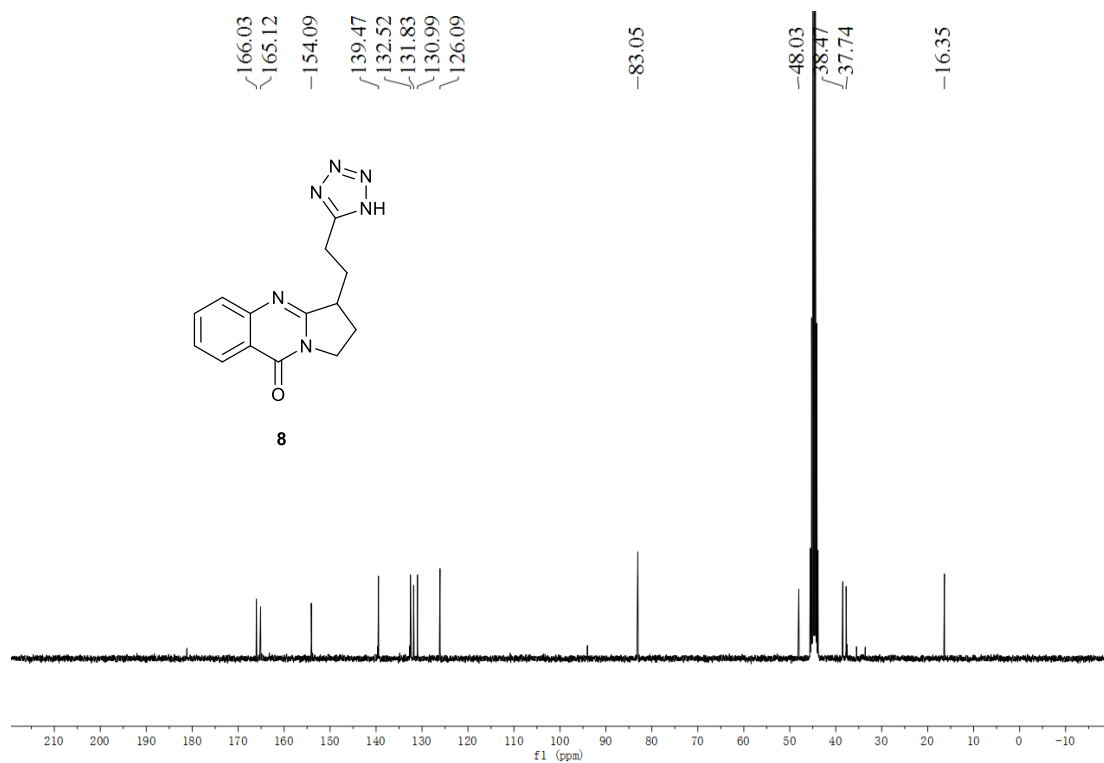

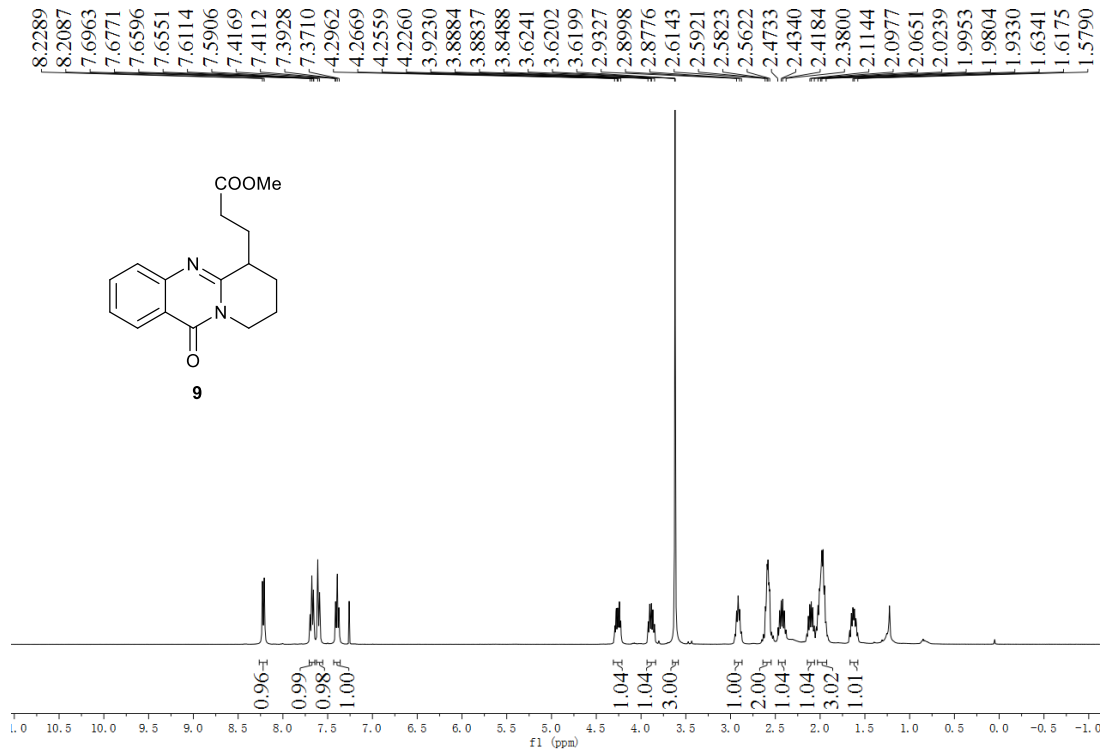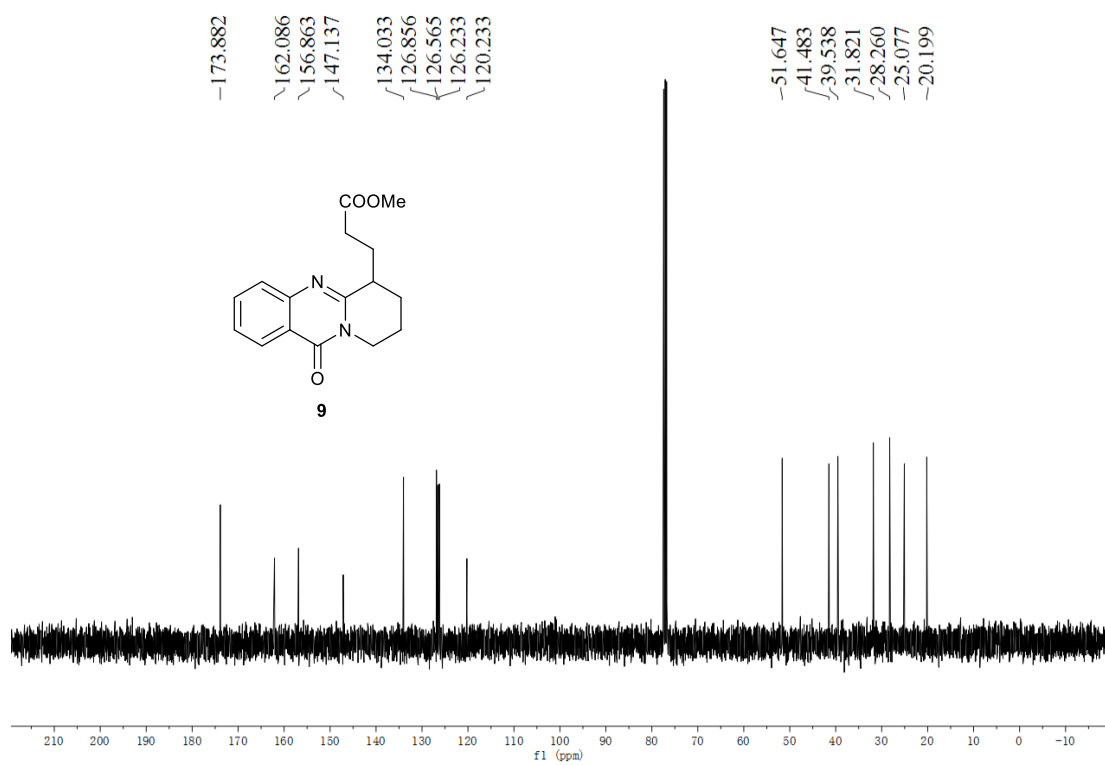

Supplement: d1nj05001j1.pdf [file d1nj05001j1.pdf]
